# Supplementary material for: SeXY chromosomes and the immune system: reflections after a comparative study
Source: Biol Sex Differ. 2020 Jan 14;11:3. doi: 10.1186/s13293-019-0278-y (PMC6958619; doi:10.1186/s13293-019-0278-y)
Supplement: Supplementary file 1 — Additional file 1. XY genes, DEF data and manual system annotation. This Excel file contains 4 sheets: 1 for codes and numerical analysis, and 3 sheets for the DEF data collection on X-, Y-, and PAR-linked genes. It formed the basis for Table 1. [file 13293_2019_278_MOESM1_ESM.xlsx]

## Sheet: ligas
HGNC		https://www.genenames.org/
Genecards (also disease)		https://www.genecards.org/cgi-bin/carddisp.pl?gene=ZIC3&keywords=
BioGPS		http://biogps.org/
ProteinAtlas		https://www.proteinatlas.org/search
ncbi gene		https://www.ncbi.nlm.nih.gov/gene/
OMIM		https://www.omim.org/
Venn chart		https://www.meta-chart.com/venn#/data				emeester	Metachart61
X-linked genes list		https://www.genenames.org/cgi-bin/download?col=gd_hgnc_id&col=gd_app_sym&col=gd_app_name&col=gd_status&col=gd_prev_sym&col=gd_aliases&col=gd_name_aliases&col=gd_pub_chrom_map&col=gd_pub_acc_ids&col=gd_pub_refseq_ids&status=Approved&status=Entry+Withdrawn&status_opt=2&chr=X&where=%28gd_pub_chrom_map+not+like+%27%25patch%25%27+and+gd_pub_chrom_map+not+like+%27%25alternate+reference+locus%25%27%29+a…
Bgee RNAexpr Ranking		https://bgee.org/?page=gene&gene_id					SIB	Swiss Institute of Bioinformatics

## Sheet: System-ISfunction-Codes
Key					X chromosome			Y chromosome				PAR
Functions biol system					n	%		n	%	nY/nX		n	%	nPAR/nX
0	U	ubiquitous, basal metabolism/functions, unknown			335	40.0239		11	17.4603	0.0328358		3	16.6667	0.00895522
1	IS	immune system			54	6.45161		10	15.873	0.185185		8	44.4444	0.148148
2	NS	nervous system			108	12.9032		2	3.1746	0.0185185		0	0
3	ES	endocrine system			35	4.1816		1	1.5873	0.0285714		1	5.55556	0.0285714
4	DRT	digest & respir tracts			7	0.83632		0	0			0	0
5	TS	tegumentary system, skin & acces			8	0.955795		0	0			0	0
6	US	urinary system			6	0.716846		0	0			0	0
7	RS	reprod system			153	18.2796		32	50.7937	0.20915		0	0
8	CV	cvs circulation			20	2.38949		0	0			0	0
9	MECT	musc.skel, connective tissue			24	2.86738		0	0			0	0
10	GDD	growth, diff, dev			87	10.3943		7	11.1111	0.0804598		6	33.3333	0.0689655
	TOTAL				837	100		63	100	0.0924535		18	100	0.0636601
					65	7.76583
Function IS-genes
0	unknown
1	proliferation & apoptosis
2	LB development & activation
3	LT development & activation
4	leukocyte distribution
5	Innate immune system & inflammation
6	Immune regulation, incl. epigenetics
7	signal transduction

## Sheet: Xgenes-DEF data
HGNC	Gene name	Name meaning	Synonyms	Locus	NM #	Function	Disease	Expression: GeneCard	Expression: Biogps	Expression: Protein atlas	Expression: ncbi	ISRG	SystemFunctionCode
48	ABCB7	ATP binding cassette subfamily B member 7	ABC7, ASAT, Atm1p, EST140535	Xq13.3	NM_004299	ATP-binding cassette (ABC) transporters, half transporter of heme from the mitochondria to the cytosol. Many splice isoforms	mitochondrial iron accumulation; sideroblastic anemia; viral infections	RespTract; PBMCs, blood	Origin: Leucocitos, principalmente linfocitos: X72T_B_lymphoblast y BDCA4_Dendritic Cells	Muscle tissues and lung		Y/N	8		Key
61	ABCD1	ATP binding cassette subfamily D member 1	adrenoleukodystrophy, ALD, ALDP, AMN	Xq28	NM_000033	ABC transporters; peroxisomal import of FAs and/or FA-CoAs. Half transporters (homodimer o heterodimer) catabolism very long chain fatty acids.	Adrenoleukodystrophy, demyelinating disorder of the NS	Testis, breast, adrenal	liver, PNS, adrenal	None		N	0		Y = yes
13557	ACE2	Angiotensin I converting enzyme 2	-	Xp22.2	-	ACE-like enzyme:cleavage of angiotensin I , vasodilator angiotensin 1-7. Regulates cardiovascular and renal function, as well as fertility. Receptor entry coronavirus	SARS, neurogenic hypertension, tetanus neonatorum, intracraneal aneurysm	heart, lung, CNS, kidney	Testis germ cells.	GIT, male reprod	GIT, kidney, testis	N	7		N = no
17152	ACOT9	Acyl-CoA thioesterase 9	ACATE2, CGI-16, MT-ACT48	Xp22.11	NM_012332	Mitochondrial acyl-CoA thioesterase of unknown function. Two splice isoforms .	Kabuki Syndrome	Heart, PBMC	-	Médula Osea y Sistema Inmune , cerebro, otros ( varios ) .		N	0		ND = no data
3571	ACSL4	Acyl-CoA synthetase long chain family member 4	ACS4, FACL4, LACS4, MRX63, MRX68	Xq23	NM_004458	Lipid biosynthesis and fatty acid degradation. Conversion of free long-chain FA into FA-CoA esters	Alport syndrome: mental retardation, midface hypoplasia and elliptocytosis	Eye, CNS, liver, DT	fetal liver,	Many, brain: neurons,	many	N	10		- = no data
24027	ACTRT1	Actin related protein T1	AIP1, ARIP1, Arp-T1, KIAA0705	Xq25	NM_138289	Major component mammalian sperm heads.		Testis, spleen, prostate	-	Male tissues		N	7		BM = Bone marrow
4516	ADGRG2	Adhesion G protein-coupled receptor G2	EDDM6, GPR64, HE6, TM7LN2	Xp22.13	-	epididymis-specific transmembrane protein. Multiple splice forms.	Congenital bilateral aplasia of the vas deferens, X-linked (CBAVDX)	Platelet	-	Males tissues		N	7		CNS = Central nervous system
18992	ADGRG4	Adhesion G protein-coupled receptor G4	GPR112, PGR17, RP1-299I16	Xq26.3	-	GPCR orphan receptor, expressed in normal enterochromaffin cells and in gastrointestinal neuroendocrine carcinoma cells.	none	eye, serum	many, everywhere	unreliable	GIT	N	0		CT = Connective tissue
3776	AFF2	AF4/FMR2 family member 2	FMR2, FRAXE	Xq28	NM_002025	Putative transcriptional activator, probably involved in RNA-splicing	Fragile X-syndrome, typhus, Brill-zinsser disease = typhus due to immune suppression	NS, spleen: germ center, blood	BM, appendix, skelMuscle	IS, spleen: surrounding tabiques/vessels, LN:	BM, LN, placenta	Y/N	0		DC = Dendritic cell
338	AGTR2	Angiotensin II receptor type 2	AT2, MRX88	Xq23	NM_000686	The GPCR receptor 1 for angiotensin II, apoptosis; developmental biology & pathophysiology importance. Highly expressed in fetus, but scantily in adult tissues, except brain, adrenal medulla, and atretic ovary.	X-linked mental retardation.	kidney, blood, lung	Tongue	None	lung, endometrium, adrenal, heart, atretic ovary, fetal tissue	N	10		DT = Digestive tract
8768	AIFM1	Apoptosis inducing factor mitochondria associated	AIF, CMTX4, NAMSD, PDCD8	Xq26.1	-	apoptosis, mitochondrial location.	Combined oxidative phosphorylation deficiency 6 (COXPD6) = severe mitochondrial encephalomyopathy; Cowchock syndrome = neuromuscular disorder, aka X-linked recessive Charcot-Marie-Tooth disease-4 (CMTX-4) = a neuropathy, and axonal and motor-sensory defects with deafness and mental retardation.	many: CNS, kidney, liver, skin, intestine	testis, adipocyte,	many	kidney	N	10		GIT = Gastrointestinal tract = DT
374	AKAP4	A-kinase anchoring protein 4	AKAP82, CT99, Fsc1, hAKAP82, HI, p82	Xp11.22	NM_003886	sperm motility (fibrous sheath protein)	Retinitis pigmentosa	Reprod: gonads; heart	male reprod	male reprod. tissues	testis	N	7		HSC = Hematopoyetic stem cell
24061	AKAP14	A-kinase anchoring protein 14	AKAP28	Xq24	NM_178813	regulation protein kinase A activity	none	Gallbladder; lung	ND	reprod. tissues, lung	testis, lung	N	0		IS = Immune system
18783	AKAP17A	A-kinase anchoring protein 17A	721P, CCDC133, CXYorf3, DXYS155E, MGC39904, SFRS17A, XE7, XE7Y	Xp22.33 +Yp11.32	NM_005088	Protein kinase A anchoring protein. Part of the spliceosome complex.	Null-cell leukemia, chronic tic disorder	Blood, liver, spleen, PBMC, fetal ovary	leucocytes, DC, lymphocytes	Kupffer cell, IS B-cell areas, mesangial, collecting tubules kidney	BM, spleen	Y	1		LB = B lymphocyte
397	ALAS2	5'-aminolevulinate synthase 2	ASB	Xp11.21	NM_000032	Heme biosynthetic pathway in erythroid-specific mitochondrially located enzyme.	Sideroblastic anemia.	PBMC, fetal liver	BM, fetal liver, erys	BM,	BM	N	8		LT = T lymphocyte
30881	ALG13	ALG13, UDP-N-acetylglucosaminyltransferase subunit	CDG1S, CXorf45, FLJ23018, GLT28D1, MDS031, TDRD13, YGL047W	Xq23	NM_018466	glycosylation of proteins	Congenital glycosylation disorder, affect: Epileptic encephalopathy, early infantile, embryonic development, (immune def)	many	pineal, LN, Tc	many, incl. SI, neurons, etc.	many	Y/N	0		LN = Lymph node
461	AMELX	Amelogenin X-linked	AMELX	Xq22.2	NM_001142	N-linked glycosylation in ER.	X-linked amelogenesis imperfecta; thin teeth, enamel missing	- ND	myocytes, heart, adrenal cortex, liver	- ND	testis, gall bladder, kidney	N	9		NK = Natural killer cell
26837	AMER1	APC membrane recruitment protein 1	FAM123B, FLJ39827, RP11-403E24.2, WTX	Xq11.2	NM_152424	Upregulation Wilms tumor protein and interacts with many other proteins, including CTNNB1, APC, AXIN1, and AXIN2.	Osteopathia striata with cranial sclerosis (OSCS).	many, incl. liver, spleen	many, liver	many, non-specific	ovary	N	10		NS = Nervous system
467	AMMECR1	Alport syndrome, mental retardation, midface hypoplasia and elliptocytosis chromosomal region gene 1	-	Xq23	-	unknown	Anemia, Mental retardation, midface hypoplasia, and elliptocytosis.	Reprod: placenta, fetal testis	erythrocytes, endothelium	unreliable	BM	N	10		PBMC = Peripheral blood mononuclear cells, i.e. monocytes & lymphocytes
17810	AMOT	Angiomotin	KIAA1071	Xq23	NM_133265	Uptake of polarity proteins along tight junctions, mainly in endothelium	Papilomatosis	BM: HSC, LB, CNS, vessels	Spinal cord, trigeminal & 1a cervical ganglion, pituitary	endothelium (LN)	placenta, brain, kidney	N/Y	0		PFC = Prefrontal cortex
6211	ANOS1	Anosmin 1	ADMLX, KAL, KAL1, KALIG-1, WFDC19	Xp22.31	NM_000216	Chemoattractant for fetal olfactory epithelial cells, branch-promoting and guidance activity olfactory neurons	X-linked Kallmann syndrome: Hypogonadotropic hypogonadism 1 with or without anosmia (HH1) (no smell, absence smell perception neurons)	testis, prostate, fetal brain	ubiquitous, non-specific	unreliable	lung, brain, thyroid, prostate	N	0		PMN = Neutrophil
560	AP1S2	Adaptor related protein complex 1 subunit sigma 2	MRX59, MRXS5, PGS, SIGMA1B	Xp22.2	NM_003916	sorting in (late) transGolgi network/endosomes; AgPresentation (biogps)	mental retardation, hydrocephalus, basal ganglia disease	PBMC, NK, LN, brain	oocyte; leukos: monocytes, blood cells	mail reprod, female reprod. (NOT IS)	endometrium, heart	Y/N	0		PNS = Peripheral nervoys system
17889	APEX2	Apurinic/apyrimidinic endodeoxyribonuclease 2	APE2, APEXL2, XTH2, ZGRF2	Xp11.21	-	somatic hypermutation (SHM) and DNA cleavage step of class switch recombination (CSR) of immunoglobulin genes.endodeoxyribonuclease,	none	BM, lung	B-cells, liver, heart	unreliable	many	Y	1		Tc = Cytotoxic T cell
16665	APLN	Apelin	apelin, XNPEP2	Xq26.1	NM_017413	Fluid homeostasis & cardiovascular regulation; insulin secretion. Coreceptor for the human immunodeficiency virus 1.	Syndrome of inappropiate antidiuretic hormone, balanitis xerotica obliterans, severe pre-eclampsia , body mass index quantitative trait locus 11, diabetes mellitus, non-insulin dependent	CNS, kidney, heart	endothelia	unreliable	placenta, lung	N	0		Th = Helper T cell
28727	APOO	Apolipoprotein O	FAM121B, MGC4825, Mic23, MIC26, My025	Xp22.11	NM_198450	Apolipoprotein family; Lipid transport and metabolism.	none	Many: CNS, lung, skin, H¡heart	pineal, 721 BLymphoblasts	Many, including IS	brain, heart, kidney, adrenal	N	0
24009	APOOL	Apolipoprotein O like	AAIR8193, CXorf33, FAM121A, Mic27, UNQ8193	Xq21.1	NM_198450	Maintenance mitochondrial inner membrane architecture; binds cardiolipin.	none	many: liver, CNS	pineal, CNS, thyroid, CD33+ myeloid stem cells	many	many, brain, heart, kidney, adrenal	N	0
644	AR	androgen receptor	AIS, DHTR, HUMARA, NR3C4, SBMA, SMAX1	Xq12	NM_000044	The androgen receptor; steroid-hormone activated transcription factor.	hypospadia, androgen insensitivity, muscular dystrophy, prostate cancer	liver, NS, muscle	liver	Male Tissues	reprod. liver	N	3
646	ARAF	A-Raf proto-oncogene, serine/threonine kinase	ARAF1	Xp11.3	-	Proto-oncogene ;Ser/Thr protein kinase family; cell growth and development	Pallister-killian syndrome (mental retardation/weak muscle/facial), mycobacterium marinum, aland islad eye disease, adenosquamous cell lung carcinoma.	many, CNS, kidney, liver, IS	liver, HSC, NK	many, IS strong, endocrine		Y/N	10		Code key
674	ARHGAP4	Rho GTPase activating protein 4	C1, KIAA0131, p115, RhoGAP4, SrGAP4	Xq28	NM_001666	neutrophil chemotaxis, rhoGAP; redistribution microtubules. Golgi location, small GTP-binding proteins;	nephrogenic diabetes insipidus.	PBMC, LN, monocytes	Leukocytes all, Th more	BM, IS strong		Y	1		Functions biol system
676	ARHGAP6	Rho GTPase activating protein 6	rhoGAPX-1	Xp22.2	NM_013427	actin remodeling + GTPase-activating for RhoA	Amelogenesis imperfecta, hipoplastic/hypomaturation, x-linked 2. Sclerocornea. Microphthalmia.	blood, platelet	Many, no resalta SI	many, incl. sistema inmune sin resaltar		N	0		0	U	ubiquitous, basal metabolism/functions, unknown
26388	ARHGAP36	Rho GTPase activating protein 36	FLJ30058	Xq26.1	NM_144967	Rho GTPases activator to inactive GDP-bound state	none	pituitary, CNS: hypothalamus; adrenal	pituitary	Cerebro y tejidos endocrinos.		N	3		1	IS	immune system
685	ARHGEF6	Rac/Cdc42 guanine nucleotide exchange factor 6	alpha-PIX, alphaPIX, Cool-2, Cool2, KIAA0006, MRX46	Xq26.3	NM_004840	Guanine nt exchange factor	mental retardation, cancers Respiratory system	IS: PBMC, LN	Leucocitos all, more Th	IS: LN + tonsil + female reprod/fat tissue		Y	1		2	NS	nervous system
14561	ARHGEF9	Cdc42 guanine nucleotide exchange factor 9	KIAA0424, PEM-2	Xq11.1	-	Guanine nt exchange factor, recruits GABAR, GlyR	epilepsy (STHEE), AKAhyperekplexia with epilepsy.	NS, eye, LB	CNS, (less pituitary, NK)	brain, CNS (little other tissues organs)	brain	N	2		3	ES	endocrine system
31709	ARL13A	ADP ribosylation factor like GTPase 13A	ARL13	Xq22.1	NM_001162491	ND	Meckel syndrome, Joubert syndrome, Orofacialdigital syndrome: primary cilia problem; fetal or Newborn death; kidney, NS, liver, many other organs misfunctions	Liver, lung	non-specific	unreliable, many	unreliable, testis many	N	0		4	DRT	digest & respir tracts
18073	ARMCX1	Armadillo repeat containing X-linked 1	ALEX1, GASP7	Xq22.1	NM_016608	axon regeneration, motile mitochondria (Gene cards); [tumor supression (ncbi)]	none	inconsistent	pineal, uterus, thyroid, GIT	endocrine, female reprod. (not LN)	female reprod, adrenal	N	3		5	TS	tegumentary system, skin & acces
16869	ARMCX2	Armadillo repeat containing X-linked 2	ALEX2, GASP9, KIAA0512	Xq22.1	NM_014782	mitochondrial distribution in neurons	none	NS, skin, NOT IS	endocrine, NS	endocrine, male reprod, smooth muscle	endocrine, reprod	N	3		6	US	urinary system
24065	ARMCX3	Armadillo repeat containing X-linked 3	ALEX3, GASP6	Xq22.1	NM_016607	mitochondrial distribution in neurons (Genecards) [tumor suppression; ncbi*	none	NS, kidney, liver, bone	pineal, endocrine, reproductive, DC	endocrine, brain, reprod	endocrine, NS	N	3		7	RS	reprod system
28615	ARMCX4	Armadillo repeat containing X-linked 4	CXorf35, GASP4, MGC40053	Xq22.1	NM_001256155	ND, unknown	none	plasma, NS, intestine	muscle, NS, endocrine (not IS)	unreliable	NS, endocrine, reprod	N	0		8	CV	cvs circulation
25772	ARMCX5	Armadillo repeat containing X-linked 5	FLJ12969, GASP5	Xq22.1	NM_022838	ND, unknown	none	NS	intestine, thyroid, Tc	GIT, endocrine, male reprod. (not IS)	ubiquitous	N	3		9	MECT	musc.skel, connective tissue
26094	ARMCX6	Armadillo repeat containing X-linked 6	FLJ20811, GASP10	Xq22.1	NM_019007	mitochondrial distribution in neurons	none	NS, urinary tract	IS, NS	endocrine, reprod.	urogenital /spleen	N (y)	2		10	GDD	growth, diff, dev
710	ARR3	Arrestin 3	ARRX	Xq13.1	NM_004312	retina-specific signal transduction	myopia, dental pulp necrosis, leber amaurosis (blindness), Usher syndrome: retinitis, deafness	Retina	retina	retina	skin	N	2
717	ARSD	Arylsulfatase D	-	Xp22.33	-	arylsulphatase for bone & cartilage composition	Chondrodysplasia, Atrial heart septal defect.	kidney, liver, intestine, nasal epithelium	skeletal muscle (not IS)	many,incl. IS, not specific at all	kidney, many	N	9
719	ARSE	Arylsulfatase E	CDPX, CDPX1	Xp22.33	NM_000047	arylsulphatase for bone & cartilage composition	chondrodysplasia	bone, kidney, liver, NS	liver	kidney, liver	kidney, liver	N	9
721	ARSF	Arylsulfatase F	-	Xp22.33	-	arylsulphatase (non-warfarin sensitive)	chondrodysplasia	kidney, NS	NS: globus pallidus	unreliable ND	kidney, skin	N	9
32488	ARSH	Arylsulfatase family member H	-	Xp22.33	NM_001011719	hydrolyze sulfate esters; involved in hormone biosynthesis, modulation of cell signaling, and degradation of macromolecules	Mucopolysaccharidosis, psychiatric	ND (serum, urine)	ND	ND	various NOT IS	N	0
18060	ARX	Aristaless related homeobox	CT121, EIEE1, ISSX, MRX29, MRX32, MRX33, MRX36, MRX38, MRX43, MRX54, MRX76, MRX87, MRXS1, PRTS	Xp21.3	-	TF, brain development, axon guidance	mental retardation, epilepsy	NS, fetal reprod. systems	ND	unreliable	ovary	N	7
17184	ASB9	Ankyrin repeat and SOCS box containing 9	DKFZP564L0862, FLJ20636, MGC4954	Xp22.2	-	ubiquitination, protein degradation	none	reproductive, skin, liver, NS (not ISI	testis, HSC, cervical ganglion, appendix	Páncreas, male reprod.	male reprod. kidney	N	7
17186	ASB11	Ankyrin repeat and SOCS box containing 11	DKFZp779E2460	Xp22.2	-	ubiquitination, protein degradation (may be)	osteogenic induction	Tonsil, heart, liver, muscle	ND	unreliable, ND	heart, stomach	N	9
19763	ASB12	Ankyrin repeat and SOCS box containing 12	FLJ39577	Xq11.2	-	ubiquitination, protein degradation (may be)	osteopathy/cranial stenosis	skeletal muscle, NS	many	unreliable, liver, muscle, kidney	heart, testis	N	9
750	ASMT	Acetylserotonin O-methyltransferase	ASMTY, HIOMT, HIOMTY	Xp22.33 + Yp11.3	NM_004043	methyltransferase, melatonin synthesis	Pineocytoma, pineoblastoma; pineal problems	Heart, NS, intestine	pineal	unreliable, ND	many, esp: IS	N (pseudoautosomal)	3
751	ASMTL	Acetylserotonin O-methyltransferase like	-	Xp22.33 + Yp11.3	NM_004192	unknown, putative unique fusion	postnatal death, severe intelectual + physical abnormalities in many body parts, patau syndrome chr13 trisomy: abnormalities urogenital, neural, facial, heart, eye development , carney complex variant	CNS, liver, adrenal, BM, intestine, ubiquitous-cytosol	LT, thyroid, liver, heart, CNS, ubiquitous	ubiquitous	ubiquitous	N/Y	0
16489	ATG4A	Autophagy related 4A cysteine peptidase	APG4A, AUTL2	Xq22.3	NM_052936	autophagy	none (Genecards); promotes metastasis in cancer (ncbi)	skel Muscle, NS,	erythrocytes, HSC	unreliable	GIT, thyroid	N	0
808	ATP1B4	ATPase Na+/K+ transporting family member beta 4	-	Xq24	NM_001142447	Transcriptional coregulator SKIP and may be involved regulation TGF-beta signaling. Muscle development	Kufor-raked syndrome =Juvenile-onset parkinson´s disease. Neurodegeneration + iron accumulation: Thyrotoxic periodic paraylisis.	muscle	muscle, NS cervical ganglia, liver, adrenal	unreliable (muscle9	(Prostate)	N	9
816	ATP2B3	ATPase plasma membrane Ca2+ transporting 3	CFAP39, CLA2, PMCA3, SCAX1	Xq28	NM_021949	Mg-dep. calcium outflux (out of cell)	Spinocerebellar ataxia, X-linked 1 (SCAX1)	CNS	Whole brain	Brain	brain + adrenal	N	2
868	ATP6AP1	ATPase H+ transporting accessory protein 1	16A, Ac45, ATP6IP1, ATP6S1, CF2, ORF, VATPS1, XAP-3, XAP3	Xq28	NM_001183	Endocytosis + exocytosis; Subunit ATPase protein pump: Ca-dep mb-fusion + regulation activity osteoclast and neuroendocrine cells, intracellular iron homeostasisEndo	Immunodeficiency 47 (IMD47), ficolin deficiency, laryngo-bronchitis, mental retardation	ubiquitous; Blood: LB; NS: eye	pineal, thyroid; IS: mph, mo	unreliable	many, brain, endocrine	Y/N	0
18305	ATP6AP2	ATPase H+ transporting accessory protein 2	APT6M8-9, ATP6IP2, ATP6M8-9, M8-9, PRR, RENR	Xp11.4	NM_005765	renin-receptor; PMN degranulation, eye pigmentation, Wnt signaling	Mental retardation, epilepsy (MRXE), Parkinsonism with spasticity, lymphocytic choriomeningitis.	nasal epithelium, NS	PMN, thyroid, NS amygdala, HSC, monocytes	unreliable: (many: thyroid, parathyroid)	thyroid, brain, kidney	N	0
869	ATP7A	ATPase copper transporting alpha	MNK	Xq21.1	NM_000052	subcellular transport (Golgi), copper	Cu-deficiency diseases like Menkes disease, spinal muscular atrophy, and occipital horn syndrome	breast, heart, liver	erys, endothelium	unreliable, many NOT IS	skin, thyroid	N	8
13554	ATP11C	ATPase phospholipid transporting 11C	ATPIG, ATPIQ	Xq27.1	NM_173694	flippase (lipid mb): B-cell differentiation	congenital hemolytic anemia	many: liver NS	fetal; ubiquitour: NS, IS: NK, Tc	unreliable	liver	Y/N	10
886	ATRX	ATRX, chromatin remodeler	JMS, MRX52, RAD54, XH2, XNP	Xq21.1	NM_000489	ATPdep helicase; transcriptional regulation, chromatin remodeling via histones, telomere implication	mental retardation, thalassemia (less erys)	many; NS, liver (blood)	pineal, PFC, pineal, IS: lymphocytes	many: endocrine, neurons, lymphos	many, brain, endocrine	Y/N	3
24173	ATXN3L	Ataxin 3 like	MJDL	Xp22.2	NM_001135995	Deubiquitinating enzyme	Machado joseph disease =neurodegenerative: spinocerebellar ataxia	brain, testis	sperm, testis	unreliable	ND	N	7
897	AVPR2	Arginine vasopressin receptor 2	DIR, DIR3, V2R	Xq28	-	GPC-arginine-vasopressine receptor; blood pressure regulation	kidney antidiuresis problems, diabetes insipidus, candadiasis	kidney, heart, NS	heart	kidney (heart) muscle	fat, kidney, heart	N	8
23252	AWAT1	Acyl-CoA wax alcohol acyltransferase 1	DGAT2L3	Xq13.1	M_001013579	lipid metabolism, acyl-transferase	none	skin (sebaceous gland)	epithelium	skin	skin	N	5
23251	AWAT2	Acyl-CoA wax alcohol acyltransferase 2	DGAT2L4, MFAT	Xq13.1	NM_001002254	lipid metabolism, acyl-transferase	none	skin	unreliable (uterus)	skin	skin	N	5
16695	BCAP31	B cell receptor associated protein 31	6C6-Ag, BAP31, CDM, DXS1357E	Xq28	NM_005745	chaperone in ER, antigen presentation, apoptosis, spermatogenesis,	hypomyelination, deafness, cerebral creatine deficiency, adrenoleukodystrophy = amyelination + accumulation long-chain FA in brain + adrenal gland	nasal epithelium, neurons, endocrine cells	pineal gland; IS: NK, DC, B	many, Neurons, liver, incl. IS	fat, adrenal	Y/N	0	investigate
27413	BCLAF3	BCLAF1 and THRAP3 family member 3	-	Xp22.12	NM_198279	unknown	none	NS, intestine	unreliable	ND	ubiquitous	N	0
20893	BCOR	BCL6 corepressor	FLJ20285, KIAA1575	Xp11.4	NM_017745	transcriptional corepressor, neg osteodentiogenic capacity	Microphthalmia, glioblastoma, myxoid leiomyosarcoma	NS, liver	thymus, Tc, NK, (pineal, cervical ganglion)	unreliable	LN, BM, thyroid	/N	10
25657	BCORL1	BCL6 corepressor like 1	CXorf10, FLJ11362	Xq26.1	NM_021946	transcriptional corepressor	Leukemia, acute myeloid	spleen, NS liver	many: BM: HSC; adrenal	unreliable	placenta, testis, thyroid	Y/N	0
28509	BEND2	BEN domain containing 2	CXorf20, MGC33653	Xp22.13	NM_153346	unknown	none	Testis, blood	platelets	Male reprod	testis	N	0
1036	BEX1	Brain expressed X-linked 1	-	Xq22.1	NM_018476	Signal transduction, RNApolII TF binding, inhibits neuronal differentiaton in response to NGF	none	NS, adrenal, pancreas	SN: todos esp. pineal, pituitaria, testis	unreliable: NS, endocrine	brain, testis	N	2
30933	BEX2	Brain expressed X-linked 2	DJ79P11.1	Xq22.2	NM_032621	mitochondrial apoptosis, cell cycle regulator G1	Breast cancer	embryology, NS	ND	unreliable	brain thyroid	N	2
13388	BEX3	Brain expressed X-linked 3	Bex, DXS6984E, HGR74, NADE, NGFRAP1	Xq22.2	NM_014380	adaptor molecule, apoptosis regulation	none	NS, endocrine	brain, pituitary, thyroid	many, brain, endocrine	many: brain, ovary	N	2
25475	BEX4	Brain expressed X-linked 4	BEXL1, FLJ10097	Xq22.1	NM_001080425	control cell cycle at tubulin level, regulation enzyme activity	none	NS	brain, thyroid	unreliable	brain, thyroid	N	2
27990	BEX5	Brain expressed X-linked 5	NGFRAP1L1	Xq22.1	NM_001159560	unknown	none	NS (heart)	brain: Pineal (day)	Brain	brain	N	2
1044	BGN	Biglycan	DSPG1, SLRR1A	Xq28	NM_001711	Leu-rich protein, collagen assembly: bone growth, muscle development and regeneration; possible regulation inflammation + innate immunity. atherosclerosis, aortic valve stenosis	achondrogenesis, Spondyloepimetaphyseal dysplasia, X-linked (SEMDX), Meester-Loeys syndrome (= aortic aneurism),	Mesenchyme, bone, NS, CT. spleen	Placenta, lung, muscle tissue (fibrous tissue)	Female reprod, muscle, endocrine	placenta, spleen (CT)	N	9
29353	BHLHB9	Basic helix-loop-helix family member b9	GASP3, KIAA1701, p60TRP	Xq22.1	NM_030639	possible transcription factors,possible neuron survival	none	NS	pineal	ND	brain	N	2
1068	BMP15	Bone morphogenetic protein 15	GDF9B	Xp11.22	NM_005448	Oocyte and follicle development: Ligand TGF-b/SMAD signaling: Regulation gene expression.	Ovarian dysgenesis+ premature ovarian failure	Ovary, testis, monocytes	many	ND	testis	N	7
1079	BMX	BMX non-receptor tyrosine kinase	ETK, PSCTK3	Xp22.2	NM_001721	signal transduction incl. STAT for cell migration	Ariboflavinosis	BM, blood: granulocytes, skin, CSF	BM, blood, CSF	Male reprod: epidydimis	inconclusive	Y/N	0
24185	BRCC3	BRCA1/BRCA2-containing complex subunit	BRCC36, C6.1A, CXorf53	Xq28	NM_024332	DNA damage response,regulates the abundance of these polyubiquitin chains in chromatin (metalloprotease); downregulation innate immunity against LPS; required in normal mitotic spindle assembly	T cell leucemia, hypogonadism	blood cells, LN, NS, lung	monocytes, NK; endocrine: thyroid, pancreas	ND	colon	Y/N	10
1113	BRS3	Bombesin receptor subtype 3	BB3, BB3R	Xq26.3	NM_001727	GPCreceptor, sperm division,	Lung cancer, body mass index quantitative trait locus	germ cells in testing, lung carcinoma	skeletal muscle (not IS)	ND	reprod. systems	N	7
17342	BRWD3	Bromodomain and WD repeat domain containing 3	FLJ38568, MRX93	Xq21.1	NM_153252	role cell morphology & cell division	mental retardation, B-cell chronic lymphocytic leukemia.	many	NS: DRG; myeloid lineage	LN strong	many	Y/N	10
1133	BTK	Bruton tyrosine kinase	AGMX1, ATK, IMD1, PSCTK1, XLA	Xq22.1	NM_000061	Crucial role in B-cell development.	X-linked agammaglobulinemia (XLA)	PBMC, LN, platelet, adipose	-	BM, IS		Y	1
24338	C1GALT1C1	C1GALT1 specific chaperone 1	C1GALT2, COSMC	Xq24	NM_152692	chaperone: protein folding, stability + activity of the core 1 beta1,3-galactosyltransferase 1.	Tn syndrome: Tn Ag on blood cell lineages, polyagglutinablity due to Tn Ab	ubiquitous; Blood: LB; NS: eye	pituitario, sup. cervical ganglion	unreliable: many	many	N	0
1378	CA5B	Carbonic anhydrase 5B	-	Xp22.2	NM_007220	hydration CO2	heart conduction, heart defects	heart, blood, LN	many; T cells	unreliable	testis	N	8
1393	CACNA1F	Calcium voltage-gated channel subunit alpha1 F	AIED, Cav1.4, CORDX3, CSNB2, CSNB2A, CSNBX2, JM8, JMC8, OA2	Xp11.23	NM_005183	Voltage-sensitive CA-channel	blindness, retinitis pigmentosa (aland-island disease)	eye	pineal (night), liver	eye	GIT	N	2
1483	CAPN6	calpain 6	CalpM, CANPX, CAPNX	Xq23	-	Microtubule organization, cytoskeleton, mobility	Leomyosarcoma. Mental retardation	placenta, intestine, muscle	placenta	ND	placenta	N	7
1497	CASK	calcium/calmodulin dependent serine protein kinase	CAGH39, FGS4, LIN2, TNRC8	Xp11.4	NM_003688	ion-channel, neuronal development	mental retardation, epilepsy, cerebellar hypoplasia	many, non-spec	non-specific	many, brain, IS: LN, appendix (CT)	brain, intestine	N	2
26371	CBLL2	Cbl proto-oncogene like 2		Xp22.11	NM_152577	ubiquitin ligase	none	spermatocyte	ND	ND	ND	N	7
28909	CCDC22	coiled-coil domain containing 22	CXorf37, JM1	Xp11.23	NM_014008	NFkB signalling	mental retardation, cerebellar malformation, heart defects (Ritscher-Schinzel syndrome)	liver, leukocytes, LN	leukocytes, thymus	unreliable	IS: spleen, BM, LN	Y	1
28910	CCDC120	coiled-coil domain containing 120	JM11	Xp11.23	NM_033626	neurite growth + vesicle transport within	none	skin, GIT, NS	non-specific	ND	skin, GIT	N	10
37286	CCDC160	coiled-coil domain containing 160	-	Xq26.2	NM_001101357	unknown	none	ND	NS, uterus, muscle,	unreliable	salivary, kidney, testis	N	0
18709	CCNB3	cyclin B3	-	Xp11.22	-	cell cycle control	Small cell sarcoma. Ewing sarcoma.	testis, intestine, NS	unspec.	Male Reprod	testis, (brain)	N	10
28434	CCNQ	cyclin Q		Xq28	NM_152274	activating CDK, cell cycle regulation	cloacal malformation, syndactyly	(kidney lung, blood)	B-cell, myeloid, brain, heart	unreliable	many: spleen	N/Y	10
11935	CD40LG	CD40 ligand	CD154, CD40L, gp39, hCD40L, HIGM1, IMD3, TNFSF5, TRAP	Xq26.3	NM_000074	Tsurface Ag; B cell activation	inability Ig-class switch, hyperIgM; toxoplasmosis, rubella	IS: Th	Th	IS: Th	IS: LN	Y	1
7082	CD99	CD99 molecule (Xg blood group)	MIC2	Xp22.32 + Yp11.3	NM_001122898	T cell adhesion, leukocyte extravasation; activates a caspase-indep apoptosis in T cell	thymic epithelial tumor, ewing sarcome	many: NS, blood	thymus, NK	BM, spleen, LN, other: reprod. tissue	many: reprod. fat	Y	1
18237	CD99L2	CD99 molecule like 2	CD99B, MIC2L1	Xq28	NM_031462	unknown	Cerebral palsy	NS, lung, muscle, blood	NS, placenta	many: brain (incl. IS)	brain	N	0
8749	CDK16	Cyclin dependent kinase 16	FLJ16665, PCTAIRE, PCTAIRE1, PCTGAIRE, PCTK1	Xp11.3	NM_006201	vesicle transport, exocytosis, signal transduction in terminally differentiated cells; escape X inactivation.	none	heart, dev. NS	NS, heart	unreliable (brain)	brain, heart testist	N	8
11411	CDKL5	Cyclin dependent kinase like 5	CFAP247, EIEE2, STK9	Xp22.13	NM_003159	protein kinase, ciliogenesis	severe epileptic encephaloty, spasms (West syndrome, and Rett syndrome (RTT))	NS: Nasal epithelium, lung	many, nonspec.	many, incl. IS (LN), brain: neurons	brain	N	2
1798	CDR1	cerebellar degeneration related protein 1	CDR, CDR34, CDR62A	Xq27.1	NM_004065	neuronal signal transduction	cerebellar degeneration, opportunistic mycosis: candidiasis, lupus	CNS, spleen	cerebellum	unreliable	-	Y/N	2
1808	CDX4	caudal type homeobox 4	-	Xq13.2	NM_005193	HOX transcription factors; regulate homeobox gene expression during anteroposterior patterning and hematopoiesis.	Renpenning syndrome = mental retardation, microcephaly, long face.	embryology, neural tube	many, nonspec.	unreliable		N	10
3968	CENPI	centromere protein I	CENP-I, FSHPRH1, LRPR1, Mis6	Xq22.1	NM_006733	centromere protein: attachment kinetochore, cell division	none (gametogenesis)	ND	unreliable (heart)	unreliable	lymph node	Y/N	10
31851	CENPVL1	centromere protein V like 3	CENPVP1 PRR6L1 "proline rich 6-like 1	Xp11.22	XM_001717451	carbon-sulfure lyase activity	ND	ND	CNS: brain	ND	ND	N	2
43880	CENPVL3	centromere protein V like 3	CENPVP3	Xp11.22	NM_001355277	carbon-sulfure lyase activity	ND	ND	ND	ND	ND	N	0
1867	CETN2	centrin 2	CALT CEN2	Xq28	NM_004344	structure microtubule center; cytokinesis, DNA repair	Xerodermia pigmentosa	PBMC	CNS: pineal + hypothalamus, endocrine, IS: NK,	unreliable	endocrine, kidney, lung	N	10
26708	CFAP47	cilia and flagella associated protein 47	CXorf59, CXorf22, CXorf30, CHDC2	Xp21.1	NM_001304548	unknown	ND	amniocyte	fallopian tube	unreliable	testis, lung	N	7
8864	CFP	complement factor properdin	PFC	Xp11.23	NM_002621	alternate complement pathway of the innate immune	properdin deficiency, complement deficiency, gacute poststreptococcal glomerulonephritis, neisseria meningitidis infection	spleen, BM, blood	IS: DC, mo, myeloid,	IS	spleen, BM, appendix	Y	1
1934	CHIC1	cysteine rich hydrophobic domain 1	BRX	Xq13.2	-	unknown	ND	heart, NS: brain	LT: NK ; CNS, fallopian	unreliable (spleen, Leydig)	brain, endocrine	N	0
1940	CHM	CHM, Rab escort protein 1	TCD, DXS540 REP-1	Xq21.2	NM_000390	posttranslation geranylgeranylation (addition 20-C lipophilic groups to C-terminus Cys; for mb insertion)	choroid disease (photorec), disorder arithmetic skills,	CNS, eye, liver	liver, heart, CNS: retina, pineal	CNS, endocrine	CNS, endocrine	N	2
29861	CHRDL1	chordin like 1	MGC1 NRLN1, CHL	Xq23	NM_145234	antagonist BMP4; converts glia to neural fate; DV-axis, bone formation	Isolated congenital megalocornea, Megalocornea, Corneal degeneration, Hypoascorbemmia	NS: Brain, eye,	uterus, adipose, olfactory bulb, retina	endocrine, reprod,NS	uterus, fat	N	2
13817	CHST7	carbohydrate sulfotransferase 7	C6ST-2, C6ST2	Xp11.3	NM_019886	synthesis chondroitin-sulfate (sulfotransferas)	ND	ovary, testis; hearts, spleen, liver; brain, placenta	heart, ovary, blood: mo	ubiquitous	spleen, ovary, fat	N/Y	9
1986	CITED1	Cbp/p300 interacting transactivator with Glu/Asp rich carboxy-terminal domain 1	MSG1	Xq13.1	NM_004143	transcriptional coactivator SMAD/TGFb ESR/EP300: pigmentation melanocytes, inhibition osteoblast mineralization ,	ND	pituitary, brain, testis /¿(fetal)	pituitary, testis, pineal		testis	N	7
2022	CLCN4	chloride voltage-gated channel 4	CLC4, ClC-4	Xp22.2	-	antiport; proton-coupled chloride transporter (brain, heart)	mental retardation, dent disease	NS, eye	NS, pineal	brain, testis	brain, heart, thyroid	N	2
2023	CLCN5	chloride voltage-gated channel 5	NPHL2, NPHL1 DENTS, XLRH, hClC-K2, hCIC-K2, CLC5, XRN, ClC-5 "Dent disease	Xp11.23	-	antiport; chloride against proton: acidification endosome; renal tube function	Dent disease, hypophosphatemic rickets, Proteinuria, low MW hypercalciuria, nephrocalcinosis, renal failure, Nephrolithiasis	kidney, fetal brain, testis	uterus, appendix, PNS, muscle	unreliable	kidney	N	6
2041	CLDN2	claudin 2	-	Xq22.3	-	Ca2+ indep cell-adhesion; tight junction	Osmotic diarrhea, Inflammatory bowel disease	DT, kidney, islets	ND	kidney, liver, gall bladder	kidney, gall bladder	N	6
51259	CLDN34	claudin 34	-	Xp22.2	-	Ca2+ indep cell-adhesion	ND	many	ND	ND	testis	N	0
2063	CLIC2	chloride intracellular channel 2	XAP121	Xq28	NM_001289	chloride channel, inhibits Ca++ influx, sarcolema	mental retardation, seizures,	spleen, fetal tissues; CNS, heart, muscle, many	erys	unrel. LN, appendix, tonsil-Germ center	thyroid, spleen, lung, LN	N/Y	8	artTanaka		investigate
29437	CLTRN	collectrin, amino acid transport regulator	TMEM27 NX17 "collectrin"	Xp22.2	NM_020665	regulator SNARE function; vesicles	Aminoaciduria, Polycystic kidney	kidney; islets-Beta cells; DT, BM	kidney	kidney	kidney	N	6
35428	CMC4	C-X9-C motif containing 4	MTCP1, MTCP1NB P8MTCP1, p8 "mature T-cell proliferation 1, isoform p8"	Xq28	NM_001018024.2	ND	moyamoya disease = cerebrovascular disorder at basal ganglia	fetal testis, heart, pancreas, muscle	(P)NS	many		N/Y	2
2149	CNGA2	cyclic nucleotide gated channel alpha 2	CNCA1, CNCA CNG2, OCNC1, OCNCa, OCNCALPHA, OCNCalpha, FLJ46312	Xq28	NM_005140	odorant signal transduction	Anosmia isolated congenital, Cranial nerve malignant neoplasm, Olfatory nerve neoplasm	testis, lung, plasma	islet	ND	testis	N	2
19701	CNKSR2	connector enhancer of kinase suppressor of Ras 2	KIAA0902, CNK2, KSR2	Xp22.12	NM_014927	adapter protein or regulator of Ras signaling	mental retardation, epileptic encephalopathy	brain, hematopoyetic	brain	ND (RNA: brain)	brain	N	2
2207	COL4A5	collagen type IV alpha 5 chain	ASLN, ATS	Xq22.3	-	basement membrane component (glomerular)	nephropathy, hematuria, hypertension	CT, kidney & others	uterus, fetal lung, CNS: hypothalamus, spinal cord, retina;	ND (RNA: smooth muscle, reprod, urinary)	urogenital	N	9
2208	COL4A6	collagen type IV alpha 6 chain	-	Xq22.3	-	basement membrane component (glomerular)	deafness, nephropathy, leiomyomatosis	DT, kidney, eye	heart, liver, muscle, pineal, myeloid, NK	ND (RNA: smooth muscle, reprod, urinary)	urogenital	N	9
2291	COX7B	cytochrome c oxidase subunit 7B	-	Xq21.1	-	mitochondrial electron transport, proper CNS development	multiple congenital anomalies	nasal epithelium, heart, liver	GIT, hematopoyetic, muscle	unreliable (muscle, brain, adrenal)	heart, kidney, GIT	N	0
2332	CPXCR1	CPX chromosome region, candidate 1	CT77 "cancer/testis antigen 77	Xq21.31	NM_033048	ND(biogps: Zn-finger; DNA binding)	none, but association: ANA Ab vasculitis	bone, testis, fetal tissues	ND	ND (RNA: testis)	testis	N/Y	0	investigate association ANA vasculitis
14281	CRLF2	cytokine receptor like factor 2	CRL2, TSLPR	Xp22.3 + Yp11.3	NM_022148	thymic stromal lymphopoietin receptor, cell proliferation via STAT3 + 5	lymphoblastic leukemia, gastrointestinal allergy, down syndrome	PBMC, LN, spleen, Tcell	skel.Muscle, CNS	ND	appendix, BM, gall bladder	Y	1
24294	CSAG1	chondrosarcoma associated gene 1	SAGE, CT24.1 "cancer/testis antigen family 24, member 1	Xq28	NM_153479	ND	chondrosarcoma	CNS (basal ganglia), testis, cancers	ND	ND (RNA: LN)	testis	N	0
16847	CSAG2	CSAF fam member 2	CSAG3B TRAG3, CT24.2	Xq28	NM_001080848	associated with drug resistance and neoplasia	chondrosarcoma	testis, brain	cancer, leucemia	ND (RNA: testis, LN)		N	10
26237	CSAG3	CSAF fam member 3	CSAG3A	Xq28	NM_203311	associated with drug resistance and neoplasia	chondrosarcoma	testis, cancers	cancer, leucemia	ND (RNA: testis, LN)		N	10
2435	CSF2RA	colony stimulating factor 2 receptor alpha subunit	CSF2R CD116, alphaGMR "alpha-GM-CSF receptor	Xp22.32 + Yp11.3	-	GM-CSF rec, low affinity; proliferation & differentiation hematopoyetic cells	(hereditary) pulmonary alveolar proteinosis, acute basophilic leukemia, crest syndrome (=scleroderma, CT disorder , Ca deposits in CT, Raynaud)	PBMC, BM, spleen, LN	IS: DC, myeloid,	unreliable	placenta, appendix, LN	Y	1
2484	CSTF2	cleavage stimulation factor subunit 2	CstF-64	Xq22.1	NM_001325	olyadenylation & 3-end cleavage mammalian pre-mRNA	ND	liver (PBMC)	non-spec, tonsil + cancers	many	testis, esophagus	N	0
33267	CT45A1	cancer/testis antigen family 45 member A1	CT45-1, CT45.1 "cancer/testis antigen CT45-1	Xq26.3	NM_001017417	ND	ND	testis, brain (diencephalo), bone, lung	ND	testis, skin	testis, lung, brain	N	7
28400	CT45A2	cancer/testis antigen family 45 member A2	CT45-2, CT45.2 "cancer/testis antigen CT45-2"	Xq26.3	NM_152582	ND (biogps: snRNA 3´-end processing)	ND	testis, adipose, cancers	ND	testis	testis, lung, brain	N	7
33268	CT45A3	cancer/testis antigen family 45 member A3	CT45A4 CT45-3, CT45.3, CT45-4, CT45.4 "cancer/testis antigen CT45-3	Xq26.3	NM_001017435	ND (biogps: snRNA 3´-end processing)	ND	testis, cancer	ND	testis, heart muscle	testis, lung, brain	N	7
33270	CT45A5	cancer/testis antigen family 45 member A5	CT45-5, CT45.5 "cancer/testis antigen CT45-5	Xq26.3	NM_001007551	ND (biogps: snRNA 3´-end processing)	ND	testis, CNS (spinal cord), cancer	ND	testis	testis, lung, brain	N	7
33271	CT45A6	cancer/testis antigen family 45 member A6	CT45-6, CT45.6 "cancer/testis antigen CT45-6	Xq26.3	NM_001017438	ND (biogps: snRNA 3´-end processing)	ND	testis, cancer	ND	testis	testis, lung, brain	N	7
51260	CT45A7	cancer/testis antigen family 45 member A7	-	Xq26.3	-	ND (biogps: snRNA 3´-end processing)	ND	testis	ND	testis	testis, lung, brain	N	7
51261	CT45A8	cancer/testis antigen family 45 member A8	-	Xq26.3	-	ND (biogps: snRNA 3´-end processing)	ND	testis	ND	testis, muscle	testis, lung, brain	N	7
51262	CT45A9	cancer/testis antigen family 45 member A9	-	Xq26.3	-	ND (biogps: snRNA 3´-end processing)	ND	testis	ND	testis, muscle	testis, lung, brain	N	7
51263	CT45A10	cancer/testis antigen family 45 member A10	-	Xq26.3	-	ND (biogps: snRNA 3´-end processing)	ND	testis	ND	testis, muscle	testis, lung, brain	N	7
33282	CT47A1	cancer/testis antigen family 47, member A1	CT47.1 "cancer/testis CT47 family, member 1	Xq24	NM_001080146	ND	ND	testis (thyroid)	ND	testis	testis	N	7
33283	CT47A2	cancer/testis antigen family 47, member A2	CT47.2 "cancer/testis CT47 family, member 2	Xq24	NM_001080145	ND	ND	testis (thyroid)	ND	testis	testis	N	7
33284	CT47A3	cancer/testis antigen family 47, member A3	CT47.3 "cancer/testis CT47 family, member 3	Xq24	NM_001080144	ND	ND	testis (thyroid)	ND	testis	testis	N	7
33285	CT47A4	cancer/testis antigen family 47, member A4	CT47.4 "cancer/testis CT47 family, member 4	Xq24	NM_001080143	ND	ND	testis (thyroid)	ND	testis	testis	N	7
33286	CT47A5	cancer/testis antigen family 47, member A5	CT47.5 "cancer/testis CT47 family, member 5"	Xq24	NM_001080142	ND	ND	testis (thyroid)	ND	testis	testis	N	7
33287	CT47A6	cancer/testis antigen family 47, member A6	CT47.6 "cancer/testis CT47 family, member 6	Xq24	NM_001080141	ND	ND	testis (thyroid)	ND	testis	testis	N	7
33288	CT47A7	cancer/testis antigen family 47, member A7	CT47.7 "cancer/testis CT47 family, member 7	Xq24	NM_001080140	ND	ND	bone, gonads	ND	testis	testis	N	7
33289	CT47A8	cancer/testis antigen family 47, member A8	CT47.8 "cancer/testis CT47 family, member 8"	Xq24	NM_001080139	ND	ND	testis (thyroid)	ND	testis	testis	N	7
33290	CT47A9	cancer/testis antigen family 47, member A9	CT47.9 "cancer/testis CT47 family, member 9	Xq24	NM_001080138	ND	ND	testis (thyroid)	ND	testis	testis	N	7
33291	CT47A10	cancer/testis antigen family 47, member A10	CT47.10 "cancer/testis CT47 family, member 10"	Xq24	NM_001080137	ND	ND	testis (thyroid)	ND	testis	testis	N	7
27397	CT47A11	cancer/testis antigen family 47, member A11	CT47.11 "cancer/testis CT47 family, member 11	Xq24	NM_173571	ND	ND	testis (thyroid)	ND	testis	testis	N	7
33292	CT47A12	cancer/testis antigen family 47, member A12	CT47.12 "cancer/testis CT47 family, member 12	Xq24	-	ND	ND	testis (thyroid)	ND	testis	testis	N	7
33293	CT47B1	cancer/testis antigen family 47, member B1	CT47.13 "cancer/testis CT47 family, member 13	Xq24	NM_001145718	ND	ND	testis (thyroid)	ND	testis	testis	N	7
26047	CT55	cancer/testis antigen 55	CXorf48 FLJ20527	Xq26.3	NM_017863	ND	ND	testis	PNS (cervical), testis, trachea	ND (RNA: testis)	testis	N	7
33494	CT83	cancer/testis antigen 83	CXorf61 KK-LC-1, FLJ20611, FLJ22913 "Kita-kyushu lung cancer antigen 1	Xq23	NM_001017978	ND	lung cancer	testis	ND	ND (RNA: testis)	testis	N	7
24198	CTAG1A	cancer/testis antigen 1A	LAGE2A, ESO1	Xq28	NM_139250	ND	ND	bone, liver, testis; gonads; blood, LN	testis	testis	testis	N	7
2491	CTAG1B	cancer/testis antigen 1B	CTAG, CTAG1 NY-ESO-1, LAGE2B, LAGE2A, ESO1, CT6.1	Xq28	NM_001327	ND	cancers	bone, liver, testis; gonads; blood, LN	testis	testis	testis	N	7
2492	CTAG2	cancer/testis antigen 2	LAGE-1, CAMEL, LAGE1, ESO2, MGC3803, MGC138724, CT6.2a, CT6.2b, LAGE-1a, LAGE-1b "CTL-recognized antigen on melanoma", "LAGE-1a protein", "cancer/testis antigen family 6, member 2a", "cancer/testis antigen family 6, member 2b"	Xq28	NM_020994	ND (biogps: centromere binding)	ND	gonads & some cancers	non-spec	gonads	reprod, heart	N	7
2520	CTPS2	CTP synthase 2	-	Xp22.2	NM_019857	cytosine nt synthesis; rate-limiting enzyme (ATP-dependent amination of UTP to CTP)	gliosarcoma	NS, fetal GIT	non-spec	unreliable (many)	many (GIT, reprod)	N	0
2555	CUL4B	cullin 4B	-	Xq24	NM_003588	ubiquitination + proteasomal degradation; involved in DNA damage + repair	mental retardation, seizures	non-spec; many	IS: DC, lymphos, pineal; testis	endocrine, reprod,NS	testis, many	N	0	investigate
4540	CXCR3	C-X-C chemokine receptor	GPR9 CKR-L2, CMKAR3, IP10-R, MigR, CD183	Xq13.1	-	proliferation + survival mesangial, chemotaxis, IFNg induction in T cells	cutaneous lupus erythematosus, pulmonary sarcoidosis, intermediate uveitis, mycosis fungoide, contact dermatitis	PBMC, spleen, DT: Tc (heart, kidney, liver, muscle, endothelium)	IS: DC, Th	IS organs	LN, spleen, appendix	Y	1
25667	CXorf21	chromosome X open reading frame 21		Xp21.2	NM_025159	ND (GWAS: SLE)	none, but associated Lupus	blood	IS: myeloid, mo, LB naive; PNS, muscle, adrenal;	unreliable (IS, endocrine)	IS: appendix, BM, LN	Y	1	interferon-inducible gene involved in sex biased TLR7 expression; Odhams, Nat Comm 2019 31092820
28589	CXorf38	chromosome X open reading frame 38		Xp11.4	NM_144970	ND	ND	bone; blood: leukos	leukos: NK, LB, DC, myeloid, Tc	IS; reprod	IS, thyroid	N/Y	0
28089	CXorf40A	chromosome X open reading frame 40A		Xq28	NM_178124	alias: endothelial-overexpressed LPS-associated factor 1; protection against inflammation	ND	muscle, kidney, liver, placenta; spleen, DT; lung	adrenal, placenta, CNS; leukos	unrel. (RNA: variable)	adrenal	N/Y	3
17402	CXorf40B	chromosome X open reading frame 40B	-	Xq28	NM_001013845	ND	ND	ND	adrenal, placenta, CNS; leukos		adrenal	N/Y	3
30891	CXorf49	chromosome X open reading frame 49	-	Xq13.1	NM_001145140	ND	ND	gonads, adipose	ND	ND (RNA: testis)	testis	N	0
34229	CXorf49B	chromosome X open reading frame 49B	-	Xq13.1	NM_001145139	ND	ND	gonads, adipose	ND	ND (RNA: testis)	testis	N	0
30533	CXorf51A	chromosome X open reading frame 51A	CXorf51	Xq27.3	NM_001144064	ND	ND	(skin, LN)	spermatocytes	ND	testis	N	7
42787	CXorf51B	chromosome X open reading frame 51B	-	Xq27.3	NM_001244892	ND (GWAS: cytokine level; response vaccine)	ND	testis	ND	ND (RNA: testis)	testis	N	7
26239	CXorf56	chromosome X open reading frame 56	FLJ22965	Xq24	NM_022101	ND	mental retardation	Bone; PBMC: lymphos, lung, gonads	oocytes: BM, leukos: NK myeloid, mo; muscle; PNS (cervical); pineal	unreliable, many	many	N /Y	7
26356	CXorf58	chromosome X open reading frame 58	FLJ25444	Xp22.11	NM_152761	ND	retinitis pigmentosa	testis	spermatocytes	unreliable (RNA: testis)	testis	N	7
33713	CXorf65	chromosome X open reading frame 65	-	Xq13.1	NM_001025265	ND	association: X-linked combined immune def	testis, blood, spleen	spermatocytes, Th	unreliable (RNA: testis, IS)	testis; IS	Y/N	7
33743	CXorf66	chromosome X open reading frame 66	RP11-35F15.2, SGPX "secreted glycoprotein, X-linked	Xq27.1	NM_001013403	ND(membrane component)	ND	heart, testis	non-spec	ND (RNA: testis)	testis	N	0
33738	CXorf67	chromosome X open reading frame 67	-	Xp11.22	NM_203407	ND(GWAS: prostate carcinoma)	endometrial-stroma sarcoma	gonads, lung, brain, skin	ND	gonads	ND	N	7
2578	CYBB /NOX2	cytochrome b-245 beta chain	CGD GP91-PHOX, NOX2 "NADPH oxidase 2	Xp21.1-p11.4	-	NADPH oxidase 2; Possible a primary componente of the microbicidal oxidase system of phagocytes	immune def, CGD, atypical mycobacteriosis	spleen, blood: PMN, mo; NS, liver	IS: BM: myeloid, mo, DC, NK	IS: BM	IS	Y	1
2582	CYLC1	cylicin 1	-	Xq21.1	NM_021118	basic protein of sperm head cytoskeleton	Ametropic amblyopia, regular astigmatism, punctate epithelial keratoconjunctivitis	testis, eye	PNS, testis, heart, liver, BM, adrenal, CNS	testis; endocrine	testis	N	7
17451	CYSLTR1	cysteinyl leukotriene receptor 1	CysLT1, CysLT(1), CYSLT1R	Xq21.1	-	bronchoconstriction; eosinophil migration	Asthma, adenoide hypertrophy, rhinitis, sinusitis, bronchial disease	spleen, leukos	PNS	IS	mainly, IS	Y	1
16814	DACH2	dachshund family transcription factor 2	-	Xq21.2	NM_053281	regulation organogenesis and myogenesis	miles carpenter syndrome, allan herndon dudley syndrome, megalocornea					N	10
31810	DCAF8L1	DDB1 and CUL4 associated factor 8 like 1	WDR42B	Xp21.3	XM_066690	ND (heterotrimeric protein complex formation)	ND, association: radiation response, prostate carcinoma, erectile dysfunction	PBMC, testis	ND	reprod; testis (final gametes), oviduct (very spec parts)	ND	N	0
31811	DCAF8L2	DDB1 and CUL4 associated factor 8 like 2	WDR42C	Xp21.3	XM_293354	ND	ND, association: radiation response, prostate carcinoma, erectile dysfunction	reprod: ovary, testia	ND	ND (RNA: testis)	ND	N	7
29395	DCAF12L1	DDB1 and CUL4 associated factor 12 like 1	WDR40B KIAA1892L	Xq25	NM_178470	WD40 regions facilitates protein complexes, multiple functions: (biogps: )ubiquitin complex	spermatogenic failure	gonads, reprod	testis	many: testis	testis (spleen)	N	7
32950	DCAF12L2	DDB1 and CUL4 associated factor 12 like 2	WDR40C	Xq25	NM_001013628	WD40 regions facilitates protein complexes, multiple functions: (biogps: )ubiquitin complex	none	testis, brain	ND	pancreas, testis, reprod, spleen: red pulp	ND	N	7
2714	DCX	doublecortin	SCLH, DC, LISX, DBCN, XLIS "doublecortex"	Xq23	NM_178153	neuronal dispersion, cerebral lamination, via microtuble-associated protein, signaling via Ca	ND	fetal brain	fetal brain	brain	brain	N	2
2745	DDX3X	DEAD-box helicase 3	DDX3 DBX, HLP2, DDX14	Xp11.4	NM_024005	multifunctional RNA helicase	mental retardation (corpus callosum agenesis); T-cell leucemia, lymphocytic choriomeningitis, childhood medulloblastoma	BM, NS	IS: myeloid, PINEAL many	NS, endocrine, reprod	BM, LN, appendix	Y/N	10	DDX3Y		expression in IS + disorders: pmid 30475900 Szappanos
20083	DDX53	DEAD-box helicase 53	CAGE, CT26 "cancer associated gene", "cancer/testis antigen 26	Xp22.11	NM_182699	ATP to ADP (death-domain)	cancers	Reprod; IS: (spleen): NK; lung, DT, liver	spermatocytes; muscle, pons	ND (RNA: testis)	ND	N	7
23250	DGAT2L6	diacylglycerol O-acyltransferase 2 like 6	DC3, FLJ25989	Xq13.1	NM_198512	acyltransferase, but without wax production; probably regulation	ND	many, skin	non-spec	ND	skin	N	5
32395	DGKK	diacylglyceral kinase kappa	-	Xp11.22	NM_001013742	phosphorylates DAG to generate phosphatidic acid	hypospadia	pituitary, brain, kidney, pancreas	non-spec	ND (adrenal)	adrenal	N	0
18399	DHRSX	dehydrogenase/reductase	DHRS5X, DHRSXY, DHRSY, DHRS5Y, SDR46C1, SDR7C6	Xp22.33 + Yp11.2	NM_145177	starvation-induced autophagy	ND	many: nasal epithelium, pancreas	ND	many: BM, neurons	many	N	0
2877	DIAPH2	diaphanous related formin 2	POF, DIA, POF2, DIA2	Xq21.33	NM_006729, NM_007309	endosome dynamics, oogenesis, new signal transduction pathway	ovarian failure, non-syndromic deafness	PBMC: monocytes; reprod. GIT,	PNS	many: reprod, GIT, IS	reprod, fat, BM	N	7
25866	DIPK2B	divergent protein kinase domain 2B	CXorf36 FLJ14103, DIA1R	Xp11.3	NM_024689	ND	autism	placenta	liver, muscle, PNS	unrelialbe (RNA: liver, NS, colon)	placenta, fat	N	0
2890	DKC1	dyskerin pseudouridine synthase 1	DKC XAP101, dyskerin, NAP57, NOLA4, Cbf5 "H/ACA ribonucleoprotein complex subunit 4"	Xq28	NM_001363	ribosome biogenesis, telomere maintenance; in proliferative cells	dyskeratosis congenita = BM failure, leukoplakia, skin pigmentation & nail dystroph, pancytopenia	PBMC, Tcell, many	IS: HSC; pineal	many: nasopharynx, bronchus	BM, LN, appendix	Y/N	10
2902	DLG3	discs large MAGUK scaffold protein 3	NE-Dlg, SAP102, SAP-102, NEDLG, KIAA1232, MRX90, PPP1R82 "neuroendocrine-dlg", "protein phosphatase 1, regulatory subunit 82	Xq13.1	NM_021120	synaptic plasticity NMDA rec signaling , synaptogenesis	mental retardation	NS: brain	non-spec	NS	brain, many	N	2
2928	DMD	dystrophin	MRX85 BMD, DXS142, DXS164, DXS206, DXS230, DXS239, DXS268, DXS269, DXS270, DXS272 "muscular dystrophy, Duchenne and Becker types"	Xp21.2-p21.1	NM_004006	anchors ECM to cytoskeleton, function neuromuscular junction and synapses in PNS and CNS	muscular dystrophy, cardiomyopathy	muscle, heart, uterus	PNS (cervical), CNS: spinal cord, pineal; liver, heart	muscle, brain	heart, fat, bladder	N	2
13910	DMRTC1	DMRT like family C1	-	Xq13.1	NM_033053	transcription factor	ND	kidney, pancreas, gonads (many)	ND	unreliable (RNA: brain, reproductive)	brain, reprod.	N	0
31686	DMRTC1B	DMRT like family C1B	-	Xq13.1	-	ND (double sex and Mab-3-related transcription factor)	ND	CNS, pituitary, kidney, pancreas, gonads	ND	unreliable (RNA: brain, reprod)	brain, reprod.	N	0
2957	DNASE1L1	deoxyribonuclease 1 like 1	DNL1L DNAS1L1, XIB, DNASEX "DNase X"	Xq28	-	endonuclease (cardiac, muscle spec); GWAS: DM-1, celiac	monocytic ehrlichiosis, xerophtalmia, keratomalacia, glycogen storage disease	muscle, PBMC: mo; placenta; DT (not CNS)	IS (BM): myeloid, monocytes, DC, NK	many: nasopharynx, bronchus	many: heart, spleen, thyroid	Y/N	0
23483	DOCK11	dedicator of cytokinesis 11	FLJ32122, FLJ43653, ZIZ2, ACG "zizimin2"	Xq24	NM_144658	B-cell development in BM and marginal zone; guanine nt exchange factor: GDP-GTP	ND	PBMC, nasal epithelium, LN	non-spec	unrel. (RNA: adipose, IS)	adipose, IS organs	Y	1
3032	DRP2	dystrophin related protein 2	-	Xq22.1	NM_001939	myelination involvement	neuropathy, hypomyelination, charcot-marie-tooth disease	NS: nerve, spinal cord, bone	PNS, NS, pituitary	ND (RNA: NS)	CNS	N	2
3076	DUSP9	dual specificity phosphatase 9	MKP-4, MKP4 "map kinase phosphatase 4"	Xq28	NM_001395	ND (double sex and Mab-3-related transcription factor)	ND	kidney, fetal tissues, DT: liver, stomach	fetal liver, placenta	placenta, kidney	placenta, kidney	N	10
20476	DUSP21	dual specificity phosphatase 21	LMW-DSP21, E.C. 3.1.3.16	Xp11.3	NM_022076	phosphatase activity (protein activity regulation: inactivation MAPK)	ND	testis, IS: PBMC, B, liver	non-spec (liver, heart, pineal, myeloid, NK)	ND (RNA: testis)	ND	N/Y	0
11694	DYNLT3	dynein light chain Tctex-type 3	TCTE1L TCTEX1L	Xp11.4	NM_006520	regulation dynein function; intracellular retrograde mobility	retinitis pigmentosa	DT, retina, islets, NS	CNS(thalamus, amygdala, PFC), pituitary, IS: lymphos	ubiquitous	adrenal, DT	N	2
3133	EBP	EBP, cholestenol delta-isomerase	CDPX2 CPX, CPXD, CHO2 "3-beta-hydroxysteroid-delta-8,delta-7-isomerase", "Chondrodysplasia punctata-2, X-linked dominant (Happle syndrome)", "sterol 8-isomerase"	Xp11.23	NM_006579	cholesterol biosynthesis; converts delta(8)-sterols to delta(7) isomers	chondrodysplasia, mental retardation, =mend syndrome	liver, gall bladder, adrenal, tesits, liver	liver, adrenal, bronchoepithelial, NK (DC, pineal)	testis, adrenal, DT	liver, adrenal, duodenum	N	0
3157	EDA	ectodysplasin A	ED1, EDA2, ODT1 EDA1, XLHED, HED, XHED, ED1-A1, ED1-A2, EDA-A1, EDA-A2	Xq13.1	NM_001399	Morphogenesis skin derivatives, ligand activation DEATH signaling, cell adhesion	ectodermal dysplasia, tooth agenesis	ectodermal derivatives, heart, liver, muscle, kidney	PNS, adrenal	RNA: endocrine	endocrine (adrenal, thyroid)	N/Y	10		?
17756	EDA2R	ectodysplasin A2 receptor	XEDAR, EDA-A2R, EDAA2R, TNFRSF27	Xq12	NM_021783	Morphogenesis skin derivatives; rec mediates NFkB and JNK pathways, via TRAF3 and 6 (TNFRSF27)	ectodermal dysplasia, tonsil cancer, androgenic alopecia	PNS, heart	PNS (cervical, DRG), liver, muscle	RNA: endocrine, muscle, reprod	endocrine, reprod	N/Y	10		?
26233	EFHC2	EF-hand domain containing 2	MRX74 FLJ22843	Xp11.3	NM_025184	unknown; biogps: cell response to leukemia inhibitor factor	eye degenerative disease; gonadal dysgenesis	DT, adipose; BBB	appendix; PNS (cervical)	unreliable (RNA: brain, DT)	testis, lung, uterus	N	3
3226	EFNB1	ephrin B1	EPLG2, CFNS LERK2, Elk-L	Xq13.1	NM_004429	adapter tyr-kinase receptor, involved in migration, cell adhesion, bidirectional signaling between cells	craniofrontonasal, hypertelorism, synostosis	bone	GIT, heart	unreliable, many	adipose, placenta	N	2
3235	EGFL6	EGF Like Domain Multiple 6	MAEG	Xp22.2	NM_015507	may bind ITGa8/b1; hair follicle morphogenesis (fetal tissues + cancers)	none	liver, lung, sc skin	lung, placenta, retina	placenta	placenta, lung	N	10
3250	EIF1AX	eukaryotic translation initiation factor 1A X-linked	EIF4C, EIF1A eIF-1A, eIF-4C	Xp22.12	-	stabilizes rRNA-protein complex: maximizes protein biosynthesis	cancers	islotes	NS; IS: HSC, B, myeloid	unreliable (many)	many; fem. reprod; thyroid	N/Y	0
3267	EIF2S3	Eukaryotic Translation Initiation Factor 2 Subunit Gamma	EIF2G EIF2gamma, EIF2 "eukaryotic translation initiation factor 2G"	Xp22.11	NM_001415	initiation protein synthesis	mental retardation, microcephaly, hypogenitalism, etx.	testis, brain. Liver, muscle	cancers: IS: B, Tc, DC,	many, MALT	LN, appendix, ovary	N/Y	0
3319	ELF4	E74 like ETS transcription factor 4	MEF, ELFR	Xq26.1	NM_001421	development&function; NK, NKT & innate; transcription factor, promotes: CSF2, IL3, IL8, lysozyme; development&function; NK, NKT & innate		blood	thymus, BM, blood	many, MALT	BM, placenta	Y	1
3321	ELK1	ELK1, ETS Transcription Factor	-	Xp11.23	NM_005229	transcription factor via JNK signaling, 3a complex with serum responsive elements,	hypervitaminosis A	ovary (fetal); B cell	PNS	gonads, neurons	NS, gonads	N	2
3331	EMD	Emerin	STA, LEMD5 "LEM domain containing 5"	Xq28	-	formation (nuclear) actin network; stabilization; nucleus periphery	myopathy, muscular dystrophy	bone, muscle	liver, heart, muscle; IS: B, Th	:	many	N	9
2259	ENOX2	Ecto-NOX Disulfide-Thiol Exchanger 2	COVA1 APK1, tNOX "tumor-associated NADH oxidase", "ecto-NADPH oxidase disulfide-thiol exchanger 2"	Xq26.1	NM_182314	disulfide-thiol interchange/oxidoreductase activity; control physical membrane displacements associated with vesicle budding or cell enlargement	none	plasma, stomach, various cancers	non-spec	unreliable (muscle)	non-spec	N	0
5174	ERAS	ES cell expressed Ras	HRAS2, HRASP	Xp11.23	NM_181532	activates the phosphatidylinositol 3-kinase signal transduction pathway in undifferentiated stem cells, but is not expressed in differentiated cells. tumor growth embryonic stem cells	chondrodysplasia, orbital tenonitis, neuropathy, intracranial abscess,	IS: NK; brain	non-spec	ND	brain, reprod	N	10
20794	ERCC6L	ERCC excision repair 6 like, spindle assembly checkpoint helicase	FLJ20105, PICH, RAD26L "PLK1-interacting checkpoint helicase"	Xq13.1	NM_017669	DNA helicase, mitotic checkpoint,	none	CSF, PBMC, breast, GIT	PNS, muscle, liver, HSC	many	BM, appendix, LN	N/Y	0
14865	ESX1	Esx homeobox 1	ESX1L ESXR1	Xq22.2	NM_153448	cell cycle progression; spermatogenesis regulation	GH def, skeletal TB, mental retardation-extropia-muscle wasting (Miles-Carpenter syndrome)	testis, placenta, CNS	uterus, DRG, DC	testis	testis	N	7
44269	ETDB	embryonic testis differentiation homolog B	LINC00633	Xq26.3	NR_033941	unknown; testis differentiation	none	ND	ND	ND	testis	N	7
53450	ETDC	embryonic testis differentiation homolog C	-	Xq26.3	NM_001358449	unknown	none	ND	ND	ND	ND	N	0
3546	F8	coagulation factor VIII	F8C FVIII, DXS1253E, HEMA "Factor VIIIF8B", "hemophilia A"	Xq28	-	blood coagulation	hemophilia	heart, serum, retina, BM, blood	pineal >>>, NS: PFC,, cervical ganglion; appendix, LN, gonads	ubiquitous: kidney, placenta, TC	adipose, lung, spleen, ovary	N	8
3547	F8A1	coagulation factor VIII associated 1	F8A DXS522E	Xq28	NM_012151	unknown	severe hemophilia; GWAS: DM-1	blood, fetal brain, pancreas; ubiquitous	leukos>>: NK>>>, thymus; lung, heart, liver; CNS: brain, pineal	ubiquitous: muscle	ND	Y/N	8
31849	F8A2	coagulation factor VIII associated 2	-	Xq28	NM_001007523	unknown	severe hemophilia; GWAS: DM-1	blood, fetal brain, pancreas; ubiquitous	leukos>>: NK>>>, thymus; lung, heart, liver; CNS: brain, pineal	unreliable: muscle	ND	N	8
31850	F8A3	coagulation factor VIII associated 3	-	Xq28	NM_001007524	unknown	severe hemophilia	blood, fetal brain, pancreas; ubiquitous	leukos>>: NK>>>, thymus; lung, heart, liver; CNS: brain, pineal	unreliable	ND	N	8
3551	F9	coagulation factor IX	FIX "Factor IX", "plasma thromboplastic component", "Christmas disease", "hemophilia B"	Xq27.1	-	coagulation	hemophilia	liver, serum, heart	liver; pineal-day	ND (RNA: liver)	liver	N	8
26440	FAAH2	fatty acid amide hydrolase 2	AMDD RP11-479E16.1, FLJ31204, FAAH-2	Xp11.21	NM_174912	degradation fatty acid amides, ej. cannabinoid-like	none	pancreas, lung, PBMC, spleen, brain, GIT, testis	non-spec	ND (RNA: parathyroid, prostate, skin)	liver	N	0
13749	FAM3A	family with sequence similarity 3 member A	DXS560S, 2-19, XAP-7	Xq28	-	may be: defensin against fungal infections	none	nasal epithelium, bone, testis, pancreas, adrenal, placenta, brain	pineal >>>; endocrine, liver, heart, DC	unreliable, kidney	ubiquitous	N	0
18403	FAM9A	family with sequence similarity 9 member A	TEX39A "testis expressed 39A	Xp22.31	NM_174951	unknown; biogps: meiotic cycle; spermatogenesis	none	testis, liver	ND	ND (RNA: testis)	testis	N	7
18404	FAM9B	family with sequence similarity 9 member B	TEX39B "testis expressed 39B"	Xp22.31	NM_205849	unknown; biogps: meiotic cycle; spermatogenesis	none; GWAS: androgenetic alopecia, susceptibility plantar warts	testis (uterus, liver)	ND	ND (RNA: testis)	testis, uterus, liver, prostate	N	7
18405	FAM9C	family with sequence similarity 9 member C	TEX39C "testis expressed 39C	Xp22.2	NM_174901	unknown; biogps: meiotic cycle; spermatogenesis; synaptonemal complex	none	spleen (RNA), testis	non-spec	ND (RNA: spleen)	spleen	Y/N	7
29962	FAM47A	family with sequence similarity 47 member A	MGC27003 "similar to hypothetical protein FLJ35782"	Xp21.1	NM_203408	unknown	none (GWAS: periodontitis)	testis, liver	activated PMN/mph	unreliable (RNA: testis)	ND	N	7
26659	FAM47B	family with sequence similarity 47 member B	FLJ35782	Xp21.1	NM_152631	unknown	none (GWAS: MS)	testis	spermatocytes	unreliable, many: testis	ND	N	7
25301	FAM47C	family with sequence similarity 47 member C	-	Xp21.1	NM_001013736	unknown	none	testis, colon muscle, esophagus	ND	ND	ND	N	7
18786	FAM50A	family with sequence similarity 50 member A	DXS9928E, XAP5, HXC-26, 9F "DNA segment on chromosome X (unique) 9928 expressed sequence"	Xq28	NM_004699	may be, transcription factor	none	PBMC; BM stromal ,spleen; many, fetal	lung, endocrine, NS: retina, pineal; IS: Th, Tc, moncyes	many	many	N	3
25085	FAM104B	family with sequence similarity 104 member B	CXorf44 FLJ20434	Xp11.21	NM_138362	unknown	none	non-spec	non-spec/ES-derived neuroepithelium	many	many	N	10
16949	FAM120C	family with sequence similarity 120 member C	CXorf17 ORF34, FLJ20506	Xp11.22	NM_017848	unknown	mental retardation, autism, (Aarskog-Scott syndrome: short stature, hypertelorism, etc.)	non-spec	non-spec	unreliable: many	brain	N	0
30490	FAM122B	family with sequence similarity 122 member B	DKFZp686L20116, RP11-308B5.5	Xq26.3	NM_145284	unknown	none (associated: colon cancer)	gonads (fetal)	pineal; HSC, Th!	IS organs >>>; gonads	gonad, LN, spleen	Y/N	3
25202	FAM122C	family with sequence similarity 122 member C	RP3-473B4.1	Xq26.3	NM_138819	unknown	ovarian failure	ovary, amniocyte, pancreas	non-spec/Immature B-cell	unreliable: skin, kidney	gonads	N	7
26748	FAM133A	family with sequence similarity 133 member A	RP1-32F7.2, FLJ37659, CT115 "cancer/testis antigen 115"	Xq21.32	NM_173698	unknown	none	testis, brain, PBMC	testis, skel muscle (thymus)	ND (RNA: testis, brain)	testis, brain	N	7
30701	FAM155B	family with sequence similarity 1555 member B	TMEM28, CXorf63 TED	Xq13.1	NM_015686	unknown; biogps: Ca2+ channel	non-bacterial endocarditis, DT infection; GWAS: tooth eruption	heart	heart, thyroid	unreliable: muscle, endocrine, seminal vesicle: LN diffuse, very spec; brain	thyroid, heart	N/Y	10
30114	FAM156A	family with sequence similarity 156 member A	TMEM29 PRO0659	Xp11.22	NM_014138	unknown	none	placenta, NS, LN	ND	many	skin, placenta	N	0
31962	FAM156B	family with sequence similarity 156 member B	TMEM29B	Xp11.22	-	unknown	none	placenta, LN; NS	ND	unreliable (many)	skin, placenta, many	N	0
25195	FAM199X	family with sequence similarity 199 member X	CXorf39	Xq22.2	NM_207318	unknown	none	skin, NS	uterus, DT, ciliary ganglion	many	many; adipose, brain	N	0
44268	FAM236A	family with sequence similarity 236 member A	DMRTC1-AS1, LINC00684	Xq13.1	NM_001348071	unknown	none	ND	ND	ND	testis	N	0
52640	FAM236B	family with sequence similarity 236 member B	-	Xq13.1	NM_001348072	unknown	none	ND	ND	ND	testis	N	0
52641	FAM236C	family with sequence similarity 236 member C	-	Xq13.1	-	unknown	none	ND	ND	ND	ND	N	0
52642	FAM236D	family with sequence similarity 236 member D	-	Xq13.1	-	unknown	none	ND	ND	ND	testis	N	0
3583	FANCB	FA complementation group B	FAB, FLJ34064, FAAP95	Xp22.2	NM_152633	DNA repair, ubiquitination	fanconi anemia, BM; anemia, leukopenia, thrombopenia; VACTERL: cardiac, renal, limb malformation	heart	appendix, LN	unreliable (RNA: LN,; protein: pancreas)	BM, LN, placenta	N/Y	4
24683	FATE1	fetal and adult testis expressed 1	FATE, CT43 "cancer/testis antigen 43	Xq28	NM_033085	regulation apoptosis via ER-mitochondria coupling	none	gonads	ND	testis	testis	N	10
3663	FGD1	FYVE, RhoGEF and PH domain containing 1	FGDY ZFYVE3	Xp11.22	NM_004463	GDP-to-GTP: cytoskeleton org; cell shape	developmental problem; short bones, stature (syndromes)	(fetal) brain, heart, lung, kidney	CNS, PNS, ubiquitous	unreliable (RNA: CNS, muscle, reprod)	brain, reprod, ubiquitous	N	10
3670	FGF13	fibroblast growth factor 13	FHF2, FGF2 "fibroblast growth factor homologous factor 2"	Xq26.3-q27.1	NM_004114	polymerization & stabilisation microtubules; axonal branching	hypertrichosis, epilepsy, mental issues; cervico-oculo-acoustic issues	CNS, eye, kidney, lung, skin	CNS, PNS, prostate, uterus	ND (RNA: brain, endocrine)	brain, endocrine	N	2
3672	FGF16	fibroblast growth factor 16	MF4	Xq21.1	NM_003868	embryonic development, cariomyocyte and heart debe	metacarpal 4-5 fusion, chronic lymphocyte leukemia	heart, sc adipose	non-spec	ND	adipose	N	10
3702	FHL1	four and a half LIM domains 1	SLIM1, KYO-T, bA535K18.1, FHL1B, XMPMA, FLH1A, MGC111107	Xq26.3	NM_001449	muscle development or hypertrophy	myopathy	muscle (skel)	muscle (skel), thyroid	muscle	muscle	N	10
3754	FLNA	filamin A	FLN1, FLN, OPD2, OPD1 ABP-280 "actin binding protein 280"	Xq28	-	cytoskeleton: actin branching; intracellular traficking; function adherens junction, cell contacts, role platelet morphology	multiple congenital birth defects	blood vessels, epithelia, muscle, many	uterus, prostate, IS	muscle, IS	epithelia	N	10
3775	FMR1	fragile X mental retardation 1	POF1, POF FMRP, FRAXA, MGC87458	Xq27.3	NM_002024	multifunctional polyribosome RNA-BP; neuronal development & plasticity	ovarian failure, mental retardation, fragile X syndrome; GWAS: ANA-associated vasculitis	PBMC, lung, brain, gonads, many	lymphos; Tc>>, placenta; CNS + pineal	many	many	N/Y	2
26372	FMR1NB	FMR1 neighbor	FLJ25736, NY-SAR-35, CT37	Xq27.3-q28	NM_152578	unknown;	none; GWAS: ANA-associated vasculitis	gonads, cancers	ND	testis	testis	N	7
7139	FOXO4	forkhead box O4	MLLT7 AFX1	Xq13.1	NM_005938	transcription factor (insulin pathway); high proteasome acti; neg regulation cell cycle	skin sarcoma, melanoma, cancers	fetal gonads, placenta; BM, muscle, skin, many	placenta; CNS, PNS	unreliable: muscle, gonads	muscle	N	0
6106	FOXP3	FOXP3 forkhead box P3	IPEX JM2, XPID, AIID, PIDX, DIETER, SCURFIN	Xp11.23	NM_014009	transcription factor for Treg; inhibits Th17	immune dysregulation, polyendocrinopathy, autoimmunity syndrome	blood, IS	adrenal, pineal, NS, myeloid	IS	IS	Y	1
30469	FOXR2	FOXR2 forkhead box R2	MGC21658, FOXN6	Xp11.21	NM_198451	regulation transcription by RNApol II activity	none	testis	non-spec	unreliable (RNA: testis)	ND	N	3
8079	FRMD7	FERM domain containing 7	NYS, NYS1 FLJ43346	Xq26.2	NM_194277	neurite development, gaze stability; pos signal transduction: GTPase	nystagmus	reprod, kidney, vessels, liver	liver, trachea, thymus, brain, Leydig, blood	unreliable (RNA: sm muscle)	kidney, uterus	N	0
29382	FRMPD3	FERM and PDZ domain containing 3	RP5-1070B1.1, KIAA1817	Xq22.3	NM_032428	unknown; biogps: cytoskeleton-secretory granule mb	none	brain, retina; Th	astrocytes	unreliable (RNA: brain, endocrine, ovary)	ovary, brain, endocrine	N	2
29007	FRMPD4	FERM and PDZ domain containing 4	PDZK10, PDZD10 KIAA0316	Xp22.2	NM_014728	regulation dendritic spine morphogenesis and density; synaptic transmission	mental retardation	CNS, nasal epithelium	CNS	ND (RNA: brain, endocrine)	brain, heart	N	2
3987	FTHL17	ferritin heavy chain like 17	CT38	Xp21.2	NM_031894	unknown; biogps: intracell sequestring (redox)	none	testis; LT, brain	oocyte	ND	embryonic germ cells	N	7
13254	FTSJ1	FtsJ RNA methyltransferase homolog 1	MRX9, MRX44 JM23, CDLIV, SPB1, TRM7, TRMT7	Xp11.23	-	methylates tRNA	mental retardation	PBMC, retina, gonads, fetal brain + tissues	lung, IS: NK, Tc, B; muscle	reprod, GIT, liver	many: LN, appendix, thyroid	N/Y	0
28746	FUNDC1	FUN14 domain containing 1	MGC51029	Xp11.3	NM_173794	hypoxia induced mitophagy activator	association: Hypoxia	many: NS, brain PFC	pineal, IS	NS	many: brain	N	3
24925	FUNDC2	FUN14 domain containing 2	HCBP6, DC44	Xq28	NM_023934	unknown	none	many, non-spec	thyroid, retina, pineal, HSC, IS: innate leukos + lymphos	many: neuron, pancreas	heart, ovary, adrenal	N	5
4057	G6PD	glucose-6-phosphate dehydrogenase	G6PD1	Xq28	NM_000402	glycolysis + rate-limiting step pentose-phosphate pathway	anemia, malaria,	blood, testis, LN; NK	IS: innate leukos, lung; adipose, muscle		many: testis, BM	N	0
17515	GAB3	GRB2 associated binding protein 3	DOS/Gab family member 3", "Gab3 scaffolding protein	Xq28	NM_001081573	unknown; macrophage differentiation pmid29180997	none	blood, spleen, platelet, Tc, LN	non-spec	many (RNA: IS)	spleen, BM, appendix, LN	Y	1	Bourgin MolCellBiol2002 11997510; Wolf 2002 11739737
4077	GABRA3	gamma-aminobutyric acid type A receptor alpha3 subunit	GABA(A) receptor, alpha 3	Xq28	NM_000808	integral Cl channel, neuronal inhibition	thyrotoxic periodic paralysis, sympathetic dystrophy, rett syndrome (=menta/neuronal)	breast, NS, fetal brain	non-spec	NS	NS, placenta	N	2
4085	GABRE	gamma-aminobutyric acid type A receptor epsilon subunit	GABA(A) receptor, epsilon	Xq28	NM_004961, NM_021990, NM_021984	integral Cl channel, neuronal inhibition	glycogen storage disease	many; adipose, heart, placenta	placenta	unreliable (adipose, muscle)	fat, placenta, skin	N	7
14454	GABRQ	gamma-aminobutyric acid type A receptor theta subunit	GABA(A) receptor, theta	Xq28	NM_018558	integral Cl channel, neuronal inhibition	none	NS: brain	skel Muscle	astrocyte	brain, adrenal, reprod	N	2
4098	GAGE1	G antigen 1	CT4.1	Xp11.23	NM_001468	melanoma Ag recognized by Tc	none	testis + tumors (variety)	testis	ND	testis , stomach	N	7
4099	GAGE2A	G antigen 2A	GAGE2 CT4.2	Xp11.23	-	unknown	none	testis	testis	testis: gametes	testis	N	7
31957	GAGE2B	G antigen 2B	-	Xp11.23	NM_001098411	melanoma Ag recognized by Tc	none	testis + tumors (variety)	testis	ND	ND	N	7
31958	GAGE2C	G antigen 2C	-	Xp11.23	NM_001472	melanoma Ag recognized by Tc	none	testis + tumors (variety)	testis	ND	ND	N	7
31959	GAGE2D	G antigen 2D	GAGE8	Xp11.23	NM_001098407	unknown	none	testis	testis	testis: gametes (RNA: GIT)	ND	N	7
31960	GAGE2E	G antigen 2E	GAGE8	Xp11.23	NM_001127200	unknown	none	testis	testis	testis: gametes (RNA: GIT)	ND	N	7
30968	GAGE10	G antigen 10	OTTHUMG00000024136	Xp11.23	NM_001098413	unknown	none	testis, pituitary	ND	testis	testis , stomach	N	7
26779	GAGE12B	G antigen 12B	OTTHUMG00000024142	Xp11.23	-	unknown	none	ND	ND	ND	testis	N	0
28402	GAGE12C	G antigen 12C	OTTHUMG00000024144	Xp11.23	-	unknown	none	testis	testis	testis: gametes (RNA: GIT)	testis , stomach	N	7
31904	GAGE12D	G antigen 12D	OTTHUMG00000024145	Xp11.23	-	unknown	none	ND	testis	testis: gametes	testis , stomach	N	7
31905	GAGE12E	G antigen 12E	OTTHUMG00000024146	Xp11.23	-	unknown	none	ND	testis	testis: gametes	testis , stomach	N	7
31906	GAGE12F	G antigen 12F	OTTHUMG00000024147	Xp11.23	-	unknown	none	ND	testis	testis: gametes	testis , stomach	N	7
31907	GAGE12G	G antigen 12G	OTTHUMG00000024148	Xp11.23	-	unknown	none	testis	testis	testis: gametes (RNA: GIT)	testis , stomach	N	7
31908	GAGE12H	G antigen 12H	OTTHUMG00000024149	Xp11.23	-	unknown	none	testis	testis	testis: gametes	testis	N	7
4105	GAGE12I	G antigen 12I	GAGE7B	Xp11.23	-	unknown	none	testis	testis	ND	ND	N	7
17778	GAGE12J	G antigen 12J	GAGE11	Xp11.23	NM_001098406	unknown	none	testis	testis	testis: gametes	testis	N	7
29081	GAGE13	G antigen 13	GAGE12A	Xp11.23	-	unknown	none	testis	testis	testis: gametes	testis	N	7
4170	GATA1	GATA binding protein 1	GF1 ERYF1, NFE1, GATA-1, NF-E1	Xp11.23	NM_002049	transcriptional activator or repressor(recognizes GATA); ery switc on	thrombocytopenia (with or without neutropenia), megakaryocytic leukemia,	blood, BM, fetal liver	HSC	BM	BM, placenta	N	8	platelets
15805	GCNA	germ cell nuclear acidic peptidase	ACRC NAAR1	Xq13.1	-	unknown	none	testis, many	Tc, Th, adrenal	testis	testis, adrenal	N/Y	7
4226	GDI1	GDP dissociation inhibitor 1	MRX48, MRX41, GDIL RABGDIA, XAP-4, OPHN2, FLJ41411 "mental retardation, X-linked 41", "mental retardation, X-linked 48", "rab GDP-dissociation inhibitor, alpha	Xq28	NM_001493	regulation vesicular-mediated cellular transport, neuronal development	mental retardation, tumor exocrine pancreas, ficolin3 def, mohr-tranebjaerg syndrome = deafness, dystionia	NS, sensory tissue	CNS	many; brain	brain	N	2
25974	GDPD2	glycerophosphodiester phosphodiesterase domain containing 2	OBDPF, FLJ20207, GDE3 "osteoblast differentiation promoting factor	Xq13.1	NM_017711	hydrolyzes glycerophosphoinositol as only substrate , bone growth	none	spleen, skin	pituitary	ND (RNA; spleen, skin)	spleen, skin, GIT	N/Y	0
26044	GEMIN8	gem nuclear organelle associated protein 8	FAM51A1 FLJ20514	Xp22.2	NM_017856	spliceosome formation	spinal muscular atropy	bone, pancreas, NS	SkelMuscle, pineal (day)	unreliable, many	thyroid, fem. reprod	N	9
4283	GJB1	gap junction protein beta 1	CMTX1, CMTX CX32 "Charcot-Marie-Tooth neuropathy, X-linked", "connexin 32	Xq13.1	NM_000166	gap junctions - connexons, low MW diffusion between cells	neuropathy	liver, brain, kidney	liver	unreliable	liver	N	4
4289	GK	glycerol kinase	GK1, GKD	Xp21.2	NM_000167	glycerol metabolism	intrauterine growth retardation, adrenal hypoplasia, ocular albinism, metaphyseal dysplasia	liver, blood, lung	intestine, blood, adrenal	liver, kidney	intestine, kidney	N	0
4296	GLA	galactosidases alpha	GALA	Xq22.1	-	galactosidase	fabry disease (neuronal) angiokeratoma, sphingolipidosis	urine, seminal vesicle, fetal gut, lung	hematopoyetic; myeloid, monocytes	adrenal, reprod	BM, placenta	N/Y	0
33358	GLOD5	glyoxalase domain containing 5	-	Xp11.23	NM_001080489	unknown	none	kidney, GIT: colon	hepatocytes	unreliable	GIT, kidney	N	4
4327	GLRA2	glycine receptor alpha 2	GLR	Xp22.2	-	ligand-gated chlorine channels, neurotransmission	none	NS	non-spec	NS	brain, colon (NS)	N	2
31715	GLRA4	glycine receptor alpha 4	-	Xp22.2	NM_001024452	ligand-gated chlorine channels, neurotransmission	pelizaeus-merzbacher syndrome (= degenerative CNS)	NS, muscle	ND	unreliable, muscle	NS	N	2
4336	GLUD2	glutamate dehydrogenase 2	GLUDP1	Xq24	NM_012084	neurotransmission	parkinson, rett (seizure)	retina, testis, NS	liver, lung, CNS	unreliable, many	ND	N	2
25553	GNL3L	G protein nucleolar 3 like	FLJ10613, GNL3B "G protein nucleolar 3B"	Xp11.22	NM_019067	processing pre-rRNA via prevents ubiquitination, for telomeric association stabilization	none	lung, NS	prostate, heart	many	many	N	8
4451	GPC3	glypican 3	SDYS OCI-5, SGBS, SGBS1, SGB, DGSX "glypican proteoglycan 3	Xq26.2	NM_004484	development mesoderm-derived tissues/organs via heparan sulfate-containing cell surface proteoglycan	wilms tumor, perlman syndrome (kidney problem), simpson-golabi-behmei syndrom = Neuronal/mental disease	kidney, lung, liver	placenta, fetal liver & lung	ND (placenta)	placenta, kidney, lung	N	10
4452	GPC4	glypican 4	K-glypican "glypican proteoglycan 4	Xq26.2	NM_001448	heparan sulfate-containing cell surface proteoglycan needed in kidney tubule and NS development	wilms tumor, perlman syndrome (kidney problem), simpson-golabi-behmei syndrom = Neuronal/mental disease	placenta, NS, skin	pituitary, lung, GIT	many: NS	placenta, kidney, lung	N	3
30677	GPKOW	G-patch domain and KOW motifs	T54, GPATC5, GPATCH5, Spp2 "G patch domain containing 5	Xp11.23	NM_015698	pre-mRNA splicing	none	cervix, PBMC, LN	IS: NK, Th, DC	many	many: brain	N/Y	0
4461	GPM6B	glycoprotein M6B	M6B, MGC17150, MGC54284	Xp22.2	NM_001001995	neural and bone development	rett syndrome =seizures	NS, eye	NS, olfactory bulb	ND	NS	N	2
4490	GPR34	G protein-coupled receptor 34	-	Xp11.4	NM_005300	orphan GPC receptor in brain, adipose, placenta, fetal, liver, spleen	night blindness, MALT-associated lymphoma	many, NS	act. Mph	many	placenta, fat, urinary bladder	N	0
4506	GPR50	G protein-coupled receptor 50	H9, Mel1c	Xq28	NM_004224	inhibitor melatonin rec 1A	mayor depression	NS: hypothalamus; pituitary, platelet	PNS (cervical); heart, liver, pituitary		placenta, fat, LN, testis	N	3
4533	GPR82	G protein-coupled receptor 101	-	Xp11.4	NM_080817	orphan rec;	none	blood, DT, thyroid	Mo+mcsf, LBm	IS: LN, msucle	IS, many	N	0
14963	GPR101	G protein-coupled receptor 83	GPCR6, PAGH2, PITA2	Xq26.3	-	orphan rec; unknown function	acromegaly, gigantism, endocrine overactivity	CNS: basal ganglia; plasma, adipos	muscle, pineal, pancreas	unreliable	ND	N	0
19060	GPR119	G protein-coupled receptor 119	hGPCR2, GPCR2	Xq26.1	NM_178471	endogenous fatty acid receptor, activates adenylate cyclase; glc-dep insulinotropic	none	adipose, pancreas (islets), testis	non-spec	ND	ND	N	0
20145	GPR143	G protein-coupled receptor 143	OA1 "ocular albinism 1"	Xp22.2	NM_000273	Tyr, L-dopa, dopamine receptor, Ca2+ influx; melanosome biogenesis	albinism, nystagmus	CNS: basal ganglia, eye; melanoycytes	retina	skin	skin (placenta)	N	2
18186	GPR173	G protein-coupled receptor 173	SREB3	Xp11.22	NM_018969	orphan rec; unknown function	neuronal, eye issues (leber congenital amaurosis)	brain, ovary (DT, lung)	liver, heart (pineal, pituitary)	ND (RNA: brain, fem. reprod)	brain, ovary	N	2
30245	GPR174	G protein-coupled receptor 174	FKSG79, GPCR17, LYPSR3	Xq21.1	NM_032553	T cell homeostasis; putative purine rec (GPC)	autoimmune polyendocrine syndreom	GIT, spleen, blood	non-spec	IS	ND	Y	1
24834	GPRASP1	G protein-coupled receptor associated sorting protein 1	GASP, GASP1	Xq22.1	NM_014710	lysosomal sorting GPC-rec	none	pancreas, retina, brain	CNS; LN: Tc, Th, endocrine	unreliable: many (ICNS)	CNS, reprod, endocrine	N/Y	2
25169	GPRASP2	G protein-coupled receptor associated sorting protein 2	GASP2, FLJ37327	Xq22.1	NM_138437	GPCR regulation	auditory canal dysmorphism	fetal brain, adrenal, heart	ND	many: CNS, endocrine, lung, reprod	CNS, reprod, endocrine	N	10
4573	GRIA3	glutamate ionotropic receptor AMPA type subunit 3	GLUR3 GluA3, GLURC, MRX94	Xq25	NM_000828	excitotory neurosynaptic transmission	mental retardation, mental issues	CNS	CNS, liver, heart	unreliable (RNA: CNS)	brain, adrenal	N	2
18706	GRIPAP1	GRIP1 associated protein 1	GRASP-1, GRASP1, KIAA1167, MPMGp800B12492Q3, DKFZp434P0630	Xp11.23	NM_207672	endosomic recycling; dendritic spine morphology, synaptic plasticity	none	PBMC, LN, liver, eye	pineal, DC, Tc, Th	endocrine		N/Y	3
4609	GRPR	gastrin releasing peptide receptor	BB2, BB2R "bombesin receptor 2	Xp22.2	NM_005314	itch-stimuli perception; gastrin-releasing peptide receptor	agorophobia, autism, cancer	DT: pancreas; lung, CNS, adrenal	muscle, PNS, CNS, other	ND (RNA: pancreas)	DT: pancreas, endometrium	N	2
4622	GSPT2	G1 to S phase transition 2	eRF3b, FLJ10441	Xp11.22	-	translation termination	autism , seizures, mental retardation	heart	leukos: NK, DC, B, , NS; testis	many	many	N	2
30189	GTPBP6	GTP binding protein 6 (putative	PGPL, FLJ20977 "pseudoautosomal GTP binding protein-like	xp22.33 + Yp11.31	NM_012227	unknown	none	lymphos: LB, heart, muscle, CNS, lung	heart, liver, thyroid; leukos: lymphos (Tc), mo	ubiquitous	kidney, spleen	N/Y	0
4691	GUCY2F	guanylate cyclase 2F, retinal	GUC2DL, GC-F, RetGC-2, ROS-GC2, CYGF "guanylate cyclase 2D-like, membrane (retina-specific)	Xq22.3-q23	NM_001522	photorec	retinits pigmentosa, leber congenital amaurosis (neuronal, eye)	ND	many	ND	testis	N	0
4700	GYG2	glycogenin 2	GN-2 "glycogenin glucosyltransferase	Xp22.33	NM_003918	formation oligosaccharide primer for glucogen synthase	glycogen-storage disease, myoclonic epilepsy,	adipose, CNS, liver	adipose, CNS: spinal cord, retina	adipose	adipose	N	2
22516	H2AFB1	H2A histone family member B1	-	Xq28	NM_001017990	Nucleosome, transcription control	none	testis, blood	liver, heart (pineal, endocrine	ND (RNA: testis)	ND	N	7
18298	H2AFB2	H2A histone family member B2	-	Xq28	NM_001017991	atypical histone, associated with active transcription and mRNA processing	none	gonads, blood,	liver, heart (pineal, endocrine), myeloid	ND (RNA: testis)	ND	N	0
14455	H2AFB3	H2A histone family member B3	H2AFB	Xq28	NM_080720	atypical histone, associated with active transcription and mRNA processing	none	gonads	liver, heart (pineal, endocrine), myeloid	ND (RNA: testis)	ND	N	0
27867	H2BFM	H2B histone family member M	-	Xq22.2	NM_001164416	nucleosome remodeling	none	testis, colon	uterus, pineal, mo, myeloid	ND (RNA: muscle, reprod, various)	ND	N	0
27252	H2BFWT	H2B histone family member W, testis-specific	-	Xq22.2	NM_001002916	atypical histone; no chromosome condensation	male infertility	testis, nasal epithelium	ND	ND (RNA: testis)	testis, placenta	N	0
32979	HAUS7	HAUS augmin like complex subunit 7	UCHL5IP UIP1 "UCH37 interacting protein 1", "26S proteasome-associated UCH interacting protein 1	Xq28	NM_017518	spindle assembly and maintenance until cytokinesis	none	vessels, bone, pancreas, PBMC: NK, Th	CNS: PFC; leukos: myeloid, mono, NK, DC, lymphos	ND (RNA: skin, liver, IS)	skin	N	0
4837	HCCS	holocytochrome c synthase	MLS CCHL "cytochrome c heme-lyase	Xp22.2	-	morphogenesis; links heme to apoprotein of cytochrome c	linear skin defects w/ multiple anomalies: neurological, ocular, cardiac, sclerocornea, diaphragmetic hernia, mental retardation	bone, breast, CNS, heart; IS: blood, LN, spleen	erys, retina, DC	liver, lung, oral mucosa; parathyroid, IS	heart, DT, various	N	10
4839	HCFC1	host cell factor C1	HFC1, MRX3 HCF-1, HCF1, CFF, VCAF, MGC70925, PPP1R89 "VP16-accessory protein", "protein phosphatase 1, regulatory subunit 89	Xq28	NM_005334	cell cycle control; multiprotein-DNA complex formation with viral transactivator protein	homocysteinemia, mental retardation, herpes simplex, lymphangitis; GWAS: SLE	LN, PBMC, heart, fetal tissues, kidney	heart, liver, PNS (cervical), CNS (parts, pineal), leukos	ND (RNA: many;thymus, spleen)	BM, spleen, LN, appendix	Y/N	10
14064	HDAC6	histone deacetylase 6	KIAA0901, JM21, HD6, FLJ16239, PPP1R90 "protein phosphatase 1, regulatory subunit 90	Xp11.23	NM_006044	epigenetic control, microtubule-dep motility; degradation misfolded protein; histone -K and tubulin deacetylation	chondrodysplasia, microphtalmia, brachydactyly	liver, PBMC; lung, kidney, gall bladder	pineal, pituitary, kidney	endocrine, reprod, & others	kidney, testis	N	3
13315	HDAC8	histone deacetylase 8	HDACL1, WTS, MRXS6 RPD3	Xq13.1	NM_018486	regulation of transcription, cell cycle progression & development; histone -K deacetylation	mental retardation, microcephaly, multiple anomalies	retina, rectum, heart,reprod; LB, Tc	pineal; PNS	endocrine; IS, pancreas, salivary gl	endocrine	N	3
26411	HDX	highly divergent homeobox	CXorf43 FLJ30678	Xq21.1	NM_144657	RNApol II transcription factor activity	none	plasmam (DT, lung NS, heart)	muscle, PNS, uterus	unreliable	endocrine, NS, uterus	N	0
4866	HEPH	hephaestin	KIAA0698, CPL	Xq12	NM_138737	copper & iron conversion-association	anemia, macular degeneration, encephalopathy	DT, heart, breast, bone	DT, CNS, muscle, uterus	ubiquitous	DT, uterus	N	2
5004	HMGB3	high mobility group box 3	HMG4 HMG2A, MGC90319 "non-histone chromosomal protein	Xq28	NM_005342	binds ssDNA: DNA looping: innate immune response to nucleic acids by acting as a cytoplasmic promiscuous immunogenic DNA/RNA sensor (By similarity). Negatively regulates B-cell and myeloid cell differentiation. In hematopoietic stem cells may regulate the balance between self-renewal and differentiation	microphtalmia, coloboma, osseous dysplasia	liver, lung, placenta	placenta, lung, HSC	lung, placenta	placenta	N	0
8013	HMGN5	high mobility group nucleosome binding domain 5	NSBP1	Xq21.1	NM_030763	modulation cell transcription	none	testis, liver, NS, BM	sup.cerv.ganglion	ubiquitous	testis	N	0
5042	HNRNPH2	heterogeneous nuclear ribonucleoprotein H2	HNRPH2 hnRNPH', FTP3, HNRPH'	Xq22.1	NM_019597	pre-mRNA processing	agammaglobulinemia, mental retardation	ubiquitous: spleen, blood, heart, kidney	DT, pineal, CNS: PFC+amygdala, IS: myeloid, mo, NK, DC, lymphos	many, incl IS	brain, kidney,adrenal appendix	Y/N	0
5157	HPRT1	hypoxanthine phosphoribosyltransferase 1	HPRT HGPRT "Lesch-Nyhan syndrome	Xq26.2-q26.3	NM_000194	purine salvage pathway	lack enzymatic activity, nt synthesis disorder	brain, liver, blood, lung, BM, many	HSC, myeloid, NK; pineal, CNS: PFC+amygdala, testis	many; CNS, IS, reprod	testis, CNS	N	0
19133	HS6ST2	heparan sulfate 6-O-sulfotransferase 2	-	Xq26.2	NM_147174	formation heparan sulfate/ECM: guidance migration; mitochondrial dehydrogenase	none; GWAS: HIV infection, periodontitis	brain, gonads,	NS, muscle	unreliable (RNA: CNS, gonads)	kidney, placenta, gonad	N	0
4800	HSD17B10	hydroxysteroid 17-beta dehydrogenase 10	HADH2, MRXS10 ERAB, MHBD, 17b-HSD10, ABAD, SDR5C1, MRPP2, CAMR "type 10 17b-HSD", "type 10 17beta-hydroxysteroid dehydrogenase	Xp11.22	NM_004493	beta-oxidation of sex hormones, bile acids, mitochondrial tRNA platform	mitochondrial disease, mental retardation	ubiquitous; CNS-AD>>>	liver, heart; thymus, leukos (pineal)	ubiquitous; CNS, IS, reprod	liver, kidney, endocrine	N	4
29603	HSFX1	heat shock transcription factor family, X-linked 1	LW-1	Xq28	NM_016153	transcription factor	none	testis, monocytes	heart, liver, pineal, PNS (cervical)	testis	gonads	N	0
32701	HSFX2	heat shock transcription factor family, X-linked 2	-	Xq28	-	transcription factor	none	testis, monocytes	heart, liver, pineal, PNS (cervical)	testis	gonads	N	0
52395	HSFX3	heat shock transcription factor family, X-linked member 3	-	Xq28	-	transcription factor	none	ND	spermatocytes	ND	testis, adrneal	N	0
52398	HSFX4	heat shock transcription factor family, X-linked member 4	-	Xq28	-	transcription factor	none	ND	ND	ND	testis, adrneal	N	0
5276	HTATSF1	HIV-1 Tat specific factor 1	TAT-SF1	Xq26.3	NM_014500	transcription elongation; upregulated by HIV-protein	none	ubiquitous: PBMC, LB, nasal epithelium	pintuitary, CNS: pineal, PFC; HSC, NK	non-spec	CNS; endocrine, testis	N	0
5295	HTR2C	5-hydroxytryptamine receptor 2C	HTR1C 5-HT2C, 5HTR2C	Xq23	NM_000868	5-HT (serotonin) rec; stress response, cortisol release	anxiety, mental issues	CNS, brain (platelet)	pineal (night), amygdala, hypothalamus, caudate	ND (RNA: brain)	brain	N	2
30892	HUWE1	HECT, UBA and WWE domain containing 1, E3 ubiquitin protein ligase	Ib772, KIAA0312, UREB1	Xp11.22	NM_031407	neural differentiation, ubiquitination, protein degradation.	mental retardation	heart, brain, placenta, ovary, PBMC	retina, thymus,	non-spec	gonads, reprod	N	0
18417	HYPM	huntingtin interacting protein M	CXorf27 HIP17	Xp11.4	NM_012274	chromatin organization; elongated polyglutamin chains	none	ND	testis	testis	ND	N	10
5386	IDH3G	isocitrate dehydrogenase 3 (NAD(+)) gamma	-	Xq28	-	decarboxylation isocitrate, metabolism, essential	none	many	heart, CNS, IS: thymus, leukos	many	kidney, heart, DT, spleen	N	0
5389	IDS	iduronate 2-sulfatase	SIDS, "Hunter syndrome	Xq28	-	lysosomal degradation heparan sulfate, dermatan sulfate, heparin	lysosomal storage disease, mucopolysaccharidosis	lymphos; NK, LT; brain, amniocyte	NK, heart, amygdal	islets, brain, pineal, Leukos:	brain	Y/N	2
5461	IGBP1	immunoglobulin binding protein 1	IBP1 , "alpha 4"	Xq13.1	-	CD79-BP; CD79 is part BCR; IgM rec-associated	labyrinthitis, agenesis corpus callosum, mental retardation, hypertelorism	heart, skel muscle, pancreas, kidney, blood	IS: leukos>>; IS organs; pancreas, fetal brain,	ubiquitous: LN, DT, fem.reprod.	ovary, fetal brain	Y	1
5948	IGSF1	immunoglobulin superfamily member 1	KIAA0364, IGDC1, IGCD1, INHBP, MGC75490, PGSF2	Xq25	-	corec inhibin; antagonized activin A (reprod hormones)	hypothyroidism	pituitary, spinal cord, testis, fetal liver, heart;	pituitary, fetal liver	pituitary, endocrine, testis	testis, adrenal	N	3
5961	IKBKG	inhibitor of nuclear factor kappa B kinase subunit gamma	IP2, IP1, IKK-gamma, NEMO, Fip3p, FIP-3, FIP3, ZC2HC9	Xq28	NM_003639	degrades NFkB inhibitor; innate protection against viral infections	immunodef, pneumococcal infection, ectodermal dysplasia	BM, blood, heart, brain, liver, skin	leukos >>	fallopian tube, many	IS organs, lung, many	Y	1
5996	IL1RAPL1	interleukin 1 receptor accessory protein like 1	IL1RAPL, MRX34, MRX21, MRX10 OPHN4, TIGIRR-2, IL1R8	Xp21.3-p21.2	NM_014271	regulation function of N-type voltage-gated Ca2+ channels, neuronal plasticity	mental retardation; GWAS: vitiligo, circadian rhythm, mosquito bite rx	CNS, (others)	CNS	ND (RNA: brain)	brain, endo	N	2
5997	IL1RAPL2	interleukin 1 receptor accessory protein like 2	IL-1R9, TIGIRR-1, IL1RAPL-2, IL1R9	Xq22.3	NM_017416	unknown. Biogps: cytokine signaling; regulation presynapse; neuronal activity	autoinflammation, joint disease, ant scleritis, urticaria, eosinophilic cellulitis (Wells syndrome)	brain, ovary, heart	PNS (cervical); pineal-day;	unreliable (RNA: brain, endocrine, IS)	IS	Y	1
6010	IL2RG	interleukin 2 receptor subunit gamma	SCIDX1, IMD4, CIDX, CD132	Xq13.1	-	common subunit various cytokine rec	cvid, lymphopenia, omenn syndrome	IS organs: PBMC, Tc	thymus, tonsil, LN: leukos	IS organs	IS organs	Y	1
6012	IL3RA	interleukin 3 receptor subunit alpha	CD123	xp22.33 + Yp11.2	-	IL-3 rec;	diphteria, leukemia, chilblain lupus, blastic plasmacytoid DC	lung, NS: IS: spleen, LN; blood	lung; DC >>>	brain, oviduct	IS organs	Y	1
6030	IL9R	interleukin 9 receptor	CD129	Xq28 + Yq12	NM_002186	IL-9 rec; escapes X-inact	asthma	hematopoyetic	testis (interstitial), cardiac muscle	IS, DT, bladder	IS, DT, bladder	Y	1
5974	IL13RA1	interleukin 13 receptor subunit alpha 1	IL-13Ra, NR4, CD213a1 "IL13 receptor alpha-1 chain", "CD213a1 antigen"	Xq24	NM_001560	cytokine signaling; low-affinity rec IL-13;	scleroderma	cervix, serum, heart, liver, muscle, ubiquitous	leukos: myeloid, mo, DC>>; islet, muscle, colon	ND (RNA: many;liver)	many; DT	Y	1
5975	IL13RA2	interleukin 13 receptor subunit alpha 2	IL-13R, IL13BP, CD213a2, CT19 "cancer/testis antigen 19	Xq23	NM_000640	cytokine signaling; high-affinity rec IL-13;	brain cancers	vessels, brain, lung	testis, pituitary	ND (RNA: testis)	testis	Y	1
27334	INTS6L	integrator complex subunit 6 like	DDX26B FLJ41215	Xq26.3	NM_182540	unkown; biogps: snRNA 3´-end processing	none	ectodermal tissue	IS, tonsil	unreliable: IS, testis	IS organs: LN, spleen, BM, appendix	N/Y	3
29059	IQSEC2	IQ motif and Sec7 domain 2	MRX1, MRX78, MRX18 KIAA0522, BRAG1, IQ-ArfGEF "brefeldin A resistant Arf-guanine nucleotide exchange factor 1"	Xp11.2	NM_001111125	Guanine nt exchange factor for ARF GTP-BP	mental retardation, neurological	brain, kidney, liver, DT	CNS, BM, liver, heart	unreliable (RNA: CNS)	brain	N	2
6112	IRAK1	interleukin 1 receptor associated kinase 1	IRAK, pelle	Xq28	-	antiviral state; TLR/IL-1R signaling, induction IFN-type I	lupus, mumps, pneumonia; mental retardation	ubiquitous: serum, lung, bone	leukos >>, resp tract	ubiquitous: IS	ubiquitous: IS, DT	Y	1
6128	IRS4	insulin receptor substrate 4	PY160, IRS-4	Xq22.3	NM_003604	mitogenic signal processing; regulation differentiation	lipodystrophy, DM, bone excess	myoblasts, liver cancer; kidney	muscle, liver, heart	unreliable (RNA: brain, endocrine, female reprod)		N	3
6154	ITGB1BP2	integrin subunit beta 1 binding protein 2	CHORDC3 "melusin"	Xq13.1	NM_012278	muscle maturation	myopathy, mental retardation	cardiac and skel muscle	heart, pineal	ND (RNA: muscle)	heart	N	9
28907	ITIH6	inter-alpha-trypsin inhibitor heavy chain family member 6	ITIH5L UNQ6369	Xp11.22	NM_198510	trypsin inh	none; GWAS: egg allergy	muscle, heart, CSF; breast, prostate	non-spec	unreliable (RNA: reprod. , muscle)	reprod.	N	0
6173	ITM2A	integral membrane protein 2A	BRICD2A, E25A "BRICHOS domain containing 2A	Xq21.1	NM_004867	plasma cell differentiation, Ig production: target gene of GATA3; osteo y chondrogenic differentiation	none	NS, retina; pancreas, blood, lung, bone	thymus, LN, blood: lymphos; retina, CNS: various;	ND (RNA: thymus, CNS, female reprod)	ovary, adrenal, adipose, LN, heart, various	Y/N	1	expre LT during hematopoyesis and pos selection pmid: 24831988
22982	JADE3	jade family PHD finger 3	PHF16 KIAA0215, JADE-3	Xp11.3	NM_014735	histone acetylation	none	ubiquitous: placenta; plasma, platelet, LB	reprod., endocrine (Leydig, placenta)	unreliable (RNA: reprod)	endocrine, reprod	N	3
6237	KCND1	potassium voltage-gated channel subfamily D member 1	Kv4.1	Xp11.23	NM_004979	voltage-gated K+ channel; heart, neurons	none	brain, heart	non-spec (thyroid; liver, heart, pineal; myeloid)	non-spec	bladder brain, IS	N	2
6241	KCNE5	potassium voltage-gated channel subfamily E regulatory subunit 5	KCNE1L	Xq23	NM_012282	Kv channel; inhibition repolarizing cardiac potassium	heart issues, hypokalemic paralysis	heat, CNS, muscle, placenta	HSC, pituitary, heart, liver, retina, pineal	unreliable (RNA: CNS)	ND	N	8
11114	KDM5C	lysine demethylase 5C	SMCX, JARID1C, MRX13 DXS1272E, XE169	Xp11.22	NM_004187	transcriptional repression neuronal genes; CLOCK GENE; histone demethylase	mental retardation, neurological	brain, muscle, retina, placenta, heart, adipose	brain, muscle, placenta	ubiquitous, inconsistent	uterus, IS organs	N	2
12637	KDM6A	lysine demethylase 6A	UTX	Xp11.3	NM_021140	regulation HOX + T-box expr; histone demethylation; spec: K-27	mental retardation (kabuki syndrome), neurological, chronic myelomonocytic leukemia, tanycytic ependymoma (cancers)	placenta; BM: LB, Tc	PNS (cervical); heart, liver, adrenal, uterus, appendix, blood	DT, IS organs; reprod	BM, endocrine, LN	N/Y	10
29218	KIAA1210	KIAA1210	-	Xq24	NM_020721	unknown; acrosomal protein	none	gonads	non-spec	reprod. Organs	testis	N	7
13339	KIF4A	kinesin family member 4A	KIF4-G1, KIF4, HSA271784, FLJ12530, FLJ12655, FLJ14204, FLJ20631, MRX100 "chromokinesin	Xq13.1	NM_012310	cell cycle from metaphase to anaphase	mental retardation	hematopoyetic: liver, spleen, thymus, BM; liver, blood, testis	HSC, thymus (cancers	IS, DT	BM, LN, appendix	N	10
6351	KLF8	Kruppel like factor 8	BKLF3, ZNF741, DXS741	Xp11.21	NM_007250	transcription modulation (repression & activation); cell cycle regulation	none	ubiquitous; kidney	non-spec	ND (RNA: skin, sm muscle)	skin, esophagus	N	0
6355	KLHL4	kelch like family member 4	KIAA1687, DKELCHL, KHL4	Xq21.31	-	unknown; biogps	mullerian aplasia, orofacial cleft	adrenal, NS, BM, heart, testis, LN, CT	liver, heart, fetal, muscle	various, not IS	adrenal, brain, reprod	N	0
22931	KLHL13	kelch like family member 13	BKLHD2, KIAA1309 FLJ10262	Xq24	NM_033495	mitotic progression	none	uterus, gall bladder	uterus, CNS: thalamus	muscle, reprod	uterus	N	7
29347	KLHL15	kelch like family member 15	KIAA1677	Xp22.11	NM_030624	key role DNA damage response; favors repair; adapter cullin-ubiquitinas	mental retardation	testis	non-spec	non-spec	BM, testis	N	0
26634	KLHL34	kelch like family member 34	FLJ34960, RP11-450P7.3	Xp22.12	NM_153270	unknown	none	muscle, heart, mu	non-spec; dev: teeth	unreliable (RNA: muscle)	ND	N	0
26007	KRBOX4	KRAB box domain containing 4	ZNF673 FLJ20344 "hypothetical protein FLJ20344	Xp11.3	NM_017776	unknown; biogps: transcription regulation	mesangial sclerosis, wilms tumor	many (Brain, femal reprod)	IS (LN): B, DC, Tc, NK; uterus	many on RNA	many: brain, female reprod.	Y/N	0
6470	L1CAM	L1 cell adhesion molecule	HSAS1, SPG1, HSAS, MASA, MIC5, S10 CD171 "neural cell adhesion molecule L1	Xq28	NM_024003	neural cell adhesion, migration, axon growth	partial agenesis corpus callosum, other neuro-anamolies	CNS, brain	CNS	CNS	brain, adrenal	N	2
26058	LAGE3	L antigen family member 3	ITBA2, CVG5, DXS9951E, DXS9879E, ESO3, Pcc1 "DNA segment on chromosome X (unique) 9879 expressed sequence	Xq28	NM_006014	involved tRNA function	Galloway-Mowat syndrome = renal-neurological disease + facial dysmorphy, contagious pustular dermatitis= viral infection	many	endothelia, CNS, heart, thymus	many	brain, adrenal, BM	N	0
6501	LAMP2	lysosomal associated membrane protein 2	CD107b	Xq24	-	chaperon-mediated autophagy; less endogeneous autoAg pres by MHC-II	glycogen-storage disease, myopathy	placenta, lung, liver, IS: PMN,	CNS, IS: PMN + thyroid,	many	brain, gall bladder, thyroid	N/Y	0
24767	LANCL3	LanC like 3	FLJ42925	Xp21.1	NM_198511	unknown	none	CNS: spinal cord, heart, PBMC	non-spec; embryonic; Tc memory	varied, but not IS	epithelia, GIT, brain	N	10
25726	LAS1L	LAS1 like, ribosome biogenesis factor	FLJ12525	Xq12	NM_031206	ribosome regulator	Wilson-Turner syndrome= mental retardation, short stature, hypogonadism, facial features; spinoMuscular atrophy	many: bone, liver, lung , CNS, spleen	many: HSC, neoplastic cells	many, incl. IS	testis, ovary, brain	N	0
6548	LDOC1	LDOC1, regulator of NFKB signaling	CUR1 Mar7, Mart7, SIRH7, RTL7 "Sushi-Ichi retrotransposon homolog 7", "mammalian retrotransposon-derived 7", "retrotransposon Gag like 7	Xq27.1	NM_012317	may be: development & progression of cancers	none	many: aorta, bone, lung, brain, thyroid, (little: leukos)	CNS, endocrine, Muscle	many (placenta)		N	2
6587	LHFPL1	LHFPL tetraspan subfamily member 1	-	Xq23	NM_178175	unknown	none	many: lung, thymus, skelMuscle, brain	non-spec	unreliable (placenta)	brain, salivary gl.	N	0
21152	LONRF3	LON peptidase N-terminal domain and ring finger 3	RNF127 FLJ22612	Xq24	NM_024778	unknown	none	skel.Muscle, PBMC, lung, brain	non-spec	unreliable	liver, lung, thyroid	N	0
4478	LPAR4	lysophosphatidic acid receptor 4	GPR23 P2Y9, P2Y5-LIKE, P2RY9, LPA4	Xq21.1	NM_005296	lysophosphatic acid receptor, signal transduction; Ca2+ intracellular AdenylateCyclase up	thyroid carcinoma	ovary, many	heart, muscle, sup.cerv.ganglion, adrenal	unreliable	ovary, brain	N	10
29292	LRCH2	leucine rich repeats and calponin homology domain containing 2	KIAA1495	Xq23	NM_020871	unknown	none	CNS, adrenal	non-spec; embryonic	many (placenta)	many, prostate, brain, NOT IS	N	10
24971	LUZP4	leucine zipper protein 4	HOM-TES-85, CT-8, CT28 "cancer/testis antigen 28	Xq23	NM_016383	mRNA nuclear export	parapsoriasis, urethritis	testis, fetal ovary, PBMC	non-spec	testis	ND	N	7
6796	MAGEA1	MAGE family member A1	MAGE1 MGC9326, CT1.1 "melanoma-associated antigen 1	Xq28	NM_004988	recruitment histone deacetylase	melanoma, testicular cancer, other cancers	testis, Neutrophil. Lung, bone	lymphoblastoma	testis	ND	N	0
6800	MAGEA2	MAGE family member A2	MAGE2 MAGEA2A, CT1.2 "cancer/testis antigen family 1, member 2	Xq28	NM_005361	reduces p53/TP53 transactivation	melanoma, dyskeratosis congenita	bone, heart	leucemia	ND (testis)	testis	N	10
19340	MAGEA2B	MAGE family member A2B	MAGEA2b, MAGE2, MGC16973, MAGEA2	Xq28	NM_153488	may be ubiquitination	melanoma, dyskeratosis congenita	testis, bone	leucemia	ND (testis)	testis	N	0
6801	MAGEA3	MAGE family member A3	MAGE3 HYPD, HIP8, MGC14613, CT1.3 "melanoma-associated antigen 3"	Xq28	NM_005362	may be ubiquitination	melanoma, lung cancer, dyskeratosis congenita, femoral neuropathy	testis, bone	leucemia	ND (testis)	testis	N	0
6802	MAGEA4	MAGE family member A4	MAGE4 MAGE4A, MAGE4B, MAGE-41, MAGE-X2, MGC21336, CT1.4	Xq28	NM_002362	unknown (embryonic dev & tumor progression)	testiicular cancer + melanoma	testis, ovary, lung	muscle, heart, liver, PNS	testis	testis	N	0
6804	MAGEA6	MAGE family member A6	MAGE6 CT1.6, MAGE3B, MAGE-3b "MAGE-6 antigen", "melanoma-associated antigen 6	Xq28	NM_005363	may be ubiquitination	terminal osseous dysplasia, melanoma, dyskeratosis congenita	testis, bone	leucemia	ND (testis)	testis	N	7
6806	MAGEA8	MAGE family member A8	MAGE8 MGC2182, CT1.8 "MAGE-8 antigen", "cancer/testis antigen family 1, member 8	Xq28	NM_005364	unknown (embryonic dev & tumor progression)	melanoma, dyskeratosis congenita	testis, monocytes	placenta	testis, placenta	placenta (testis	N	7
6807	MAGEA9	MAGE family member A9	MAGE9 MGC8421, CT1.9 "MAGE-9 antigen", "melanoma-associated antigen 9", "cancer/testis antigen family 1, member 9"	Xq28	NM_005365	unknown (embryonic dev & tumor progression)	terminal osseous dysplasia, melanoma, dyskeratosis congenita	ovary, testis	tesits: spermatocytes PNs	ND (testis)	testis	N	7
31909	MAGEA9B	MAGE family member A9B	-	Xq28	NM_001080790	unknown (embryonic dev & tumor progression)	tumors, terminal osseous dysplasia	ovary, testis	tesits: spermatocytes PNs	ND (testis)	testis	N	7
6797	MAGEA10	MAGE family member A10	MAGE10 MGC10599, CT1.10 "MAGE-10 antigen", "melanoma-associated antigen 10", "cancer/testis antigen family 1, member 10	Xq28	NM_021048	unknown (embryonic dev & tumor progression)	melanoma, dyskeratosis congenita	testis, bone, stomach, placenta	placenta	placenta, testis	placenta, testis	N	7
6798	MAGEA11	MAGE family member A11	MAGE11 MAGE-11, MAGEA-11, MGC10511, CT1.11 "MAGE-11 antigen", "melanoma-associated antigen 11", "cancer/testis antigen family 1, member 11"	Xq28	NM_005366	androgen receptor coregulator; embryonic development & tumor progression	melanoma, dyskeratosis congenita	testis	non-spec	ND (testis)	testis, placenta	N	7
6799	MAGEA12	MAGE family member A12	MAGE12 CT1.12 "cancer/testis antigen family 1, member 12	Xq28	NM_005367	unkown	melanoma, cancers	testis, many cancers	adrenal medulla, leucemia	ND (testis)	testis	N	3
6808	MAGEB1	MAGE family member B1	AGEL1, MAGE-Xp, DAM10, MGC9322, CT3.1 "DSS/AHC critical interval MAGE superfamily 10", "cancer/testis antigen family 3, member 1	Xp21.2	NM_002363	unknown	alternating hemiplagia (Neuronal)	reprod, testis + ovary	testis	testis	ND	N	7
6809	MAGEB2	MAGE family member B2	DAM6, MAGE-XP-2, MGC26438, CT3.2 "DSS/AHC critical interval MAGE superfamily 6	Xp21.2	NM_002364	ubiquitination	melanoma, alternating hemiplagia (Neuronal)	testis, placenta, ovary, melanoma	testis, skel Muscle	testis	testis	N	7
6810	MAGEB3	MAGE family member B3	CT3.5 "cancer/testis antigen family 3, member 5	Xp21.2	NM_002365	unknown	testicular tumor	testis (heart)	heart, liver, PNS	testis, neurons	testis	N	10
6811	MAGEB4	MAGE family member B4	MGC33144, CT3.6 "melanoma-associated antigen B4", "cancer/testis antigen family 3, member 6"	Xp21.2	NM_002367	unknown	none	platelet, testis (heart, ovary)	PNS, muscle, cardiac	testis	ND	N	0
23795	MAGEB5	MAGE family member B5	MAGE-B5, CT3.3 "cancer/testis antigen family 3, member 3"	Xp21.3	XM_293407	unknown	none	Testis	ND	Testis (25%)	Testis	N	7
23796	MAGEB6	MAGE family member B6	FLJ40242, MAGE-B6, MAGEB6A, CT3.4 "cancer/testis antigen family 3, member 4"	Xp21.3	NM_173523	unknown	none	Testis:, plasma.	spermatocytes	Trophoblasts, Seminiferous, Tonsil (50%)		N	7
25377	MAGEB10	MAGE family member B10	FLJ32965	Xp21.3	NM_182506	unknown	none	platelet, testis (ovary)	ND	Testis (25%)		N	7
21188	MAGEB16	MAGE family member B16	-	Xp21.1	-	unknown	none	amniocyte, testis	ND	unreliable		N	7
17418	MAGEB17	MAGE family member B17	-	Xp22.2	XM_066701	unknown	none	DT, testis	non-spec	testis		N	7
28515	MAGEB18	MAGE family member B18	MGC33889	Xp21.3	NM_173699	Enhance ubiquitin ligase activity of RING-type zinc finger-containing E3 ligases	none	testis, placenta	ND	testis	ND	N	7
6812	MAGEC1	MAGE family member C1	MAGE-C1, CT7, MGC39366, CT7.1 "cancer/testis antigen family 7, member 1"	Xq27.2	NM_005462	unknown	Melanoma, multiple myleooma, spermocytoma, parapsoriasis	testis, bone, ovary	non-spec	testis		N	7
13574	MAGEC2	MAGE family member C2	MAGEE1 CT10, MAGE-C2, HCA587 "cancer/testis antigen 10"	Xq27.2	NM_016249	may be a protein kinase inhibitor	Melanoma, Hepatocellular carcinoma	testis, bone	skel.Muscle	testis		N	7
23798	MAGEC3	MAGE Family Member C3	HCA2, MAGE-C3, CT7.2 "cancer/testis antigen family 7, member 2"	Xq27.2	NM_138702	unknown	none	CNS: brain, spinal cord, cervix; IS: T-cell	many (muscle)	testis		N	0
6813	MAGED1	MAGE Family Member D1	NRAGE, DLXIN-1	Xp11.22		apoptosis after NGF binding in neurons, regulation circadian rhythm	melanoma/cancer, mental retardation, seborrheic kerastosis	ubiquitous: BM, bone, heart	pituitary, muscle, CNS, IS: DC	ND (RNA: endocrine, reprod.)		N	10
16353	MAGED2	MAGE family member D2	MAGE-D2 Antigen, Hepatocellular Carcinoma-Associated Protein JCL-1, Breast Cancer-Associated Gene 1 Protein, BCG-1	Xp11.21	NM_014599	cell cycle regulation, traslocation of NaCl cotransporters TCD	mental retardation, cancers, polyhydramnios, Antenatal Bartter Syndrome (hipocalemia, alcalosis)	many: kidney, PBMC, nasal epithelium	endocrine, muscle, CNS (pineal; night)	many		N	0
23793	MAGED4	MAGE Family Member D4	MAGE1, MGC3210, KIAA1859, MAGE-E1	Xp11.22	NM_001098800	Enhance ubiquitin ligase activity of RING-type zinc finger-containing E3 ligases	none	brain, reprod, BM stroma	endocrine, CNS	unreliable		N	0
22880	MAGED4B	MAGE Family Member D4B	KIAA1859, Melanoma Antigen Family D, 4B	Xp11.22	-	Enhance ubiquitin ligase activity of RING-type zinc finger-containing E3 ligases	glioma	brain, reprod, BM stroma	endocrine, CNS	endocrine, reprod.		N	10
24934	MAGEE1	MAGE Family Member E1	MAGE-E1 Antigen, Hepatocellular Carcinoma-Associated Protein 1, Alpha-Dystrobrevin-Associated MAGE Protein, Dystrobrevin-Associated MAGE Protein, KIAA1587	Xq13.3	NM_020932	Enhance ubiquitin ligase activity of RING-type zinc finger-containing E3 ligases	melanoma	NS, stomach	embryonic, IS:T cell	CNS		N	10
24935	MAGEE2	MAGE Family Member E2	MAGE-E2 Antigen, Hepatocellular Carcinoma-Associated Protein 3, HCA3	Xq13.3	NM_138703	unknown	melanoma	heart; IS: Th; NS	non-spec	unreliable		N/Y	2
24092	MAGEH1	MAGE Family Member H1	APR1, Apoptosis-Related Protein 1, Restin	Xp11.21	NM_014061	cell cycle arrest, growth inhibition, apoptosis, , all-trans retinoic acid & STAT1alpha signaling	none	fetal brain, NS, pancreatic islets	CNS, pituitary, testis, prostate	unreliable (LN very strong)	ND	N	10
30006	MAGIX	MAGI Family Member, X-Linked	PDZX, JM10, FLJ21687	Xp11.23	NM_024859	unknown	none	adipocyte, skin, CNS,	non-spec: PNS, muscle	unreliable	GIT, kidney	N	0
28880	MAGT1	Magnesium Transporter 1	DKFZp564K142, IAP, OST3B, MRX95 "oligosaccharyltransferase 3 homolog B (S. cerevisiae)"	Xq21.1	NM_032121	N-glycosylsaton (from lipid to nascent proteins)	immunedef, selective Ig deficiency, lymphoproliferative syndrome, epstein-barr virus infection (glycosylation disorder, mental disability)	ubiquitous: nasal epithelium, PBMC: monocytes	thyroid, smooth-Muscle, IS: DC, NK, monocytes	many, endocrine		Y/N	0
2568	MAMLD1	Mastermind Like Domain Containing 1	CXorf6, CG1, Chromosome X Open Reading Frame 6, HYSP2	Xq28	NM_005491	transcriptional co-activator NOTCH proteins	Hypospadias, androgen insensitivity	breast, fetal tissues	testis, pineal (night-day)	unreliable		N	10
6833	MAOA	Monoamine Oxidase A	-	Xp11.3	NM_000240	oxidation of monoamines DA, NA, A, 5HT	psiquiatric disease (brunner sx, antisocial)	many, not IS	DT, endocrine, ovary (not IS)	many, CNS, endocrine, etc. (NOT IS)		N	0
6834	MAOB	Monoamine Oxidase B	-	Xp11.3	NM_000898	oxidation of monoamines benzylamine & phenylethylamine.	blindness, depression, encephalopathy	many, Spinal cord	CNS, uterus, DT: intesting	many, no		N	0
31689	MAP3K15	Mitogen-Activated Protein Kinase Kinase Kinase 15	Apoptosis Signal-Regulating Kinase 3, MAPK/ERK Kinase Kinase 15, EC 2.7.11.25, EC 2.7.11.25	Xp22.12	NM_001001671	signal transduction by cell stress: apoptosis	pyruvate dehydrogenase deficiency, lethargy, seizures and nasal flaring	adrenal gland	non-spec	adrenal gland	adrenal, heart	N	3
25899	MAP7D2	MAP7 Domain Containing 2	MAP7 Domain Containing 2 Brain	Xp22.12	NM_152780	microtubule assembly & stability (low G2)	none	CNS; female reprod; IS: monocytes	non-spec	brain, DT, reprod	brain, reprod	N	2
25742	MAP7D3	MAP7 Domain Containing 3	MDP3, MAP7 Domain-Containing Protein 3	Xq26.3	-	microtubule assembly & stability (low G2)	muscular dystrophy, hemangioma	Artery, BM stromal, adipose, testis	many; skel Muscle	many; reprod	many, testis, adipose	N	9
20564	MBNL3	Muscleblind Like Splicing Regulator 3	Cys3His CCG1-Required Protein, MBLX39, CHCR, Protein HCHCR	Xq26.2	NM_018388	alternative splicing regulation; (inhibits muscle diff?)	muscular dystrophy, cerebellum cancer, C3 deficiency	heart, placenta, liver, blood	non-spec	femal reprod &	reprod.	N	9
15455	MBTPS2	Membrane Bound Transcription Factor Peptidase, Site 2	KFSD, S2P, site-2 protease	Xp22.12	-	Cleaves type-2 transmembrane transcription factors, including sterol regulatory element-binding protein (SREBP	keratoderma, keratosis	placenta	non-spec	non-spec	many	N	0
6940	MCF2	MCF.2 Cell Line Derived Transforming Sequence	DBL, ARHGEF21 "Oncogene MCF2 (oncogene DBL)	Xq27.1	NM_005369	guanine nt exchane, modulates Rhos- GTPases (bound GDP-to bound GTP)	parasitic protozoa infection, discharging ear, faciogenital dysplasia (Aarskog-Scott syndrome	fetal brain, CNS, heart, testis, adrenal	pineal gland, (testis, adrenal cortex; mouse: spinal cord: blastocyst)	adrenal, reprod, CNA	adrenal, reprod, CNA	N	0
23357	MCTS1	MCTS1, Re-Initiation And Release Factor	MCT-1 "multiple copies in T-cell lymphoma-1	Xq24	NM_014060	cell cycle regulation; proliferation, anti-oncogene	none (cancers'')	ubiquitous: IS: Lt	lung; IS: LB, DC, mo, PMN, NK; lung, smooth muscle	ND-non-spec	LN, brain, appendix, thyroid, many	N	0
6990	MECP2	Methyl-CpG Binding Protein 2	RTT, MRX16, MRX79	Xq28	NM_004992	corepressor via methylated DNA	mental retardation, autism, encephalopathy	many: PBMC, Tc, blood, incl. GIT	pineal; NS; IS: T cell	many, except GIT	ovary, endometrium, brain	N	2
11957	MED12	Mediator Complex Subunit 12	TNRC11, FGS1 CAGH45, HOPA, OPA1, TRAP230, KIAA0192, OKS	Xq13.1	NM_005120	coactivator nearly all RNApol-II dep genes	mental retardation, agenesis corpus callosum, facial, stature, voice	ubiquitous, breast, NS	pineal, IS; thymus, Tc + others, placenta, thymus, adrenal	many	ovary, spleen, adrenal	N	0
2370	MED14	Mediator Complex Subunit 14	CXorf4, CRSP2 EXLM1, CRSP150, TRAP170, RGR1, CSRP	Xp11.4	NM_004229	coactivator nearly all RNApol-II dep genes	none	IS: spleen, LN; many	many, non-spec (PNS)	ND (para)thyroid, epidydimis	Thyroid, GIT, appendix, LN	N	0
40162	MED14OS	MED14 Opposite Strand	MED14-AS1	Xp11.4	NM_001289773	unknonw (anti-sense strand)	none	ND	ND	ND	many: kidney, colon	N	0
7095	MID1	Midline 1	OS, FXY, TRIM18, RNF59 "Opitz/BBB syndrome	Xp22	-	ubiquitination & degradation route, microtubule org., stress response	midline malformation, hipospadia, cleft lip, tracheoesophageal fistular, etc, (opitz-gobb syndrome,	heart, placenta, NS, liver (fetal kidney=	Treg naive, embryo: neura precursor	NS: glial; neuroendocrine in colon	prostate, GIT, bladder	N	10
20715	MID1IP1	MID1 Interacting Protein	TRAIT11499, FLJ10386, MIG12, THRSPL, G12-like "gastrulation specific G12 homolog (zebrafish)	Xp11.4	-	lipid biosynthesis (incl. TAG, DAG, phospholipid; stabilization microtubules	none	fetal liver, esophagus, NS, muscle	lung, IS: monocytes, myeloid (PMN), CNS	unreliable	BM, fat, lung	N/Y	0
7096	MID2	Midline 2	FXY2, TRIM1, RNF60, MRX101	Xq22.3	NM_012216	microtubule stabilitzation,	mental retardation, anogenital venereal wart (HPV), hypertelorism, hypospadia, discitis (Inflammation)	NS, kidney	keratinoyctes	Non-spec	ND	N	0
28100	MMGT1	Membrane Magnesium transporter 1	MEM32 EMC5 "ER membrane protein complex subunit 5	Xq26.3	NM_173470	Mg transport	none	bone, placenta	AV-node, PNS, pineal, DC, myeloid, monocytes	kidney, adrenal, CT	thyroid	N	0
23485	MORC4	MORC Family CW-Type Zinc Finger 4	ZCWCC2 ZCW4, FLJ11565	Xq22.3	NM_024657	unknown (nucleic acid and protein binding motifs, Zn-finger)	none	fetal gut, pancreas, heart, placenta testis	placenta	placenta, testis, adrenal	placenta, testis, adrenal	N	7
16849	MORF4L2	Mortality Factor 4 Like 2	KIAA0026, MRGX "MORF-related gene X	Xq22.2	NM_012286	replicative senescence, apoptosis, growth arrest; transcription activation of select genes via H4, H2A acetylation	paraneoplastic cerebellar degeneration	lung, breast, adrenal, NS, pancreas	CNS, pituitary, muscle	many	reprod, brain, adrenal	N	10
25235	MOSPD1	Motile Sperm Domain Containing 1	dJ473B4	Xq26.3	NM_019556	proliferation or differentiation of mesenchyme	double outlet right ventricle	bone (NS)	immature erythrocytes, endothelium	unrel. Many	adrenal, endometrium, testis	N	10
28381	MOSPD2	Motile sperm domain containing 2	MGC26706	Xp22.2	NM_152581	monocyte-PMN migration in response to chemokines; PMN degranulation; innate immunesystem	VACTERL + hydrocephalus (ventriculomegaly)	IS: monocytes++, PMN, Bone, NS	IS: granulocytes, monocytes; NS	unreliable	thryoid, brain, skin	Y/N	2
44205	MPC1L	Mitochondrial Pyruvate Carrier 1 Like	SLC54A3	Xp11.4	NM_001195522	unknown	none	testis	non-spec	male reprod	ND	N	0
7219	MPP1	Membrane Palmitoylated Protein 1	DXS552E PEMP	Xq28	NM_002436	regulates neutrophil polarity byt AKT1 phosphorylation	nasopharyngeal carcinoma, burkitt lymphoma	PBMC, many: NS, blood	BM: HSC, immature leuks & erys	placenta, BM	placenta, BM	Y	1
7370	MSL3	MSL Complex Subunit 3	MSL3L1	Xp22.2	NM_006800	chromatin-remodeling; H4 acetylation especially at K-16; role X-inactivation	none	PBMC, esophagus, NS, liver	many, PNS, muscular	IS (RNA)	LN, appendix, spleen	Y	1
7373	MSN	Moesin	-	Xq12	NM_002444	immunosynapse formation; proliferation, migration, adhesion lymphocytes	Immunodef 50, measles, neisseria meningitidis; Robinow syndrome=facial-genital abnormalities; neurofibromatosis II=acne, facial paralysis, sebaceous gl malfunction	IS: LN, blood; many: liver, blood, NS	IS++: NK, myeloind, leukos; BM, thymus, LN, lung	IS+++		Y	1
7423	MTCP1	Mature T cell proliferation 1	P13MTCP1, p8MTCP1, C6.1B	Xq28	NM_001018025	mature LT proliferation; enhances phosphorylation + activation of AKT1 + 2; discovered in T cell, but present in liver, testis	cardiomyopathy, mental retardation, T cell leukemia, queensland tick thyphus	many, blood, IS: NK, Tc	PNS, cardiac muscle	testis, skin	testis, heart	Y/N	10
7448	MTM1	Myotubularin 1	-	Xq28	NM_000252	phosphatase for the substrates: PI3P, PI(3,5)P2, P-Tyr and P-Ser-peptides; endosome-lysosome fusion, vacuolar formation, desmin assembly, muscle maintenance	myopathy, charco-marie-tooth disease (=neuronal-muscle disease);	PBMC, NS muscle	many, PNS, muscular, adrenal, BM	GIT	colon, testis, thyroid	N	0
7449	MTMR1	Myotubularin related Protein 1	-	Xq28	NM_003828, NM_176789	phosphoinositol-3P phosphatase, lipid metabolism	charco-marie-tooth disease (=neuronal-muscle disease)	NS, liver, (muscle)	IS++: DC, lymphos, thymus, tonsil, placenta; NS; pineal, amigdal		IS: LN, spleen; esophagus	Y/N	7
16825	MTMR8	myotubularin-related protein 8	FLJ20126	Xq11.2	NM_017677	phosphoinositol-phosphatase	none	fetal brain, intestine	skel.Muscle, pituitary	ND	colon, stomach	N	0
37167	MTRNR2L10	MT-RNR2-Like 10	Humanin-Like 10, HN10, MT-RNR2-Like Protein 10	Xp11.21	NM_001190708	neuroprotective, anti-apoptopic	none	brain, thyroid, testis	ND	ND	ND	N	9
26583	MUM1L1	MUM1 Like 1	Mutated Melanoma-Associated Antigen 1-Like Protein 1, PWWP Domain-Containing Protein MUM1L1	Xq22.3	NM_152423	unknown	none	reprod: gonads	female reprod.	reprod.	ovary testis	N	7
7539	MXRA5	Matrix Remodeling Associated 5	Adlican, Adhesion Protein With Leucine-Rich Repeats And Immunoglobulin, Domains Related To Perlecan; DKFZp564I1922	Xp22.33	NM_01541	anti-inflammatory in kidney	lung cancer	kidney, liver, spleen, amniocyte,	GIT, adrenal, uterus, thyroid, retina	unreliable; neuropile (6-yr-old male)		N/Y	0
18704	NAA10	N(Alpha)-Acetyltransferase 10, NatA Catalytic Subunit	ARD1A, HARD1, TE2, MCOPS1, ARD1, DXS707	Xq28	NM_003491	acetyl transferase, protein Met-def proteins, or initiates degradation, chromatid separation -mitosis	microphtalmia, cardiogenic shock, premature aging	breast, nasal epithelium, liver lung	non-spec, IS IR+, cancers +	many	many	N	0
7638	NAP1L2	Nucleosome Assembly Protein 1 Like 2	BPX, MGC26243	Xq13.2	NM_021963	may be interaction DNA-protein (intronless)	neural tube defects	fetal granulocytes, NS	NS, pituitary	brain (RNA)	ND	N	2
7639	NAP1L3	Nucleosome Assembly Protein 1 Like 3	MB20, NPL3, MGC26312	Xq21.32	NM_004538	may be interaction DNA-protein (intronless)	none	fetal keratinocytes, NS, heart	NS, pituitary	brain (RNA)	ND	N	2
50713	NBDY	negative regulator of P-body association	LINC01420, NoBody "non-annotated P-body dissociating polypeptide	Xp11.21	NM_001348129	mRNA decapping; dispersal P-body components	none	ND	embryonic tissue	endocrine (RNA)	endocrine	N	10
31795	NCBP2L	nuclear cap binding protein subunit 2 like	-	Xq22.3	NM_001348372	unknown; nucleic acid binding	none	PBMC ++, testis, adrenal	ND	unreliable	ND	N	7
7678	NDP	NDP, norrin cystine knot growth factor	EVR2, norrin; "exudative vitreoretinopathy 2 (X-linked)", "Norrie disease (pseudoglioma)"	Xp11.3	NM_000266	Wnt signaling pathway, neural cell differentiation + proliferation	vitreoretinopathy, blindness, retinal telangiectasis	NS: brain; ovary	reprod male + female, NS	unreliable (neurons)	ovary, brain	N	2
7683	NDUFA1	NADH:ubiquinone oxidoreductase subunit A1	MWFE, CI-MWFE "NADH:ubiquinone oxidoreductase (complex 1)", "type I dehydrogenase", "NADH dehydrogenase (ubiquinone) 1 alpha subcomplex, 1 (7.5kD, MWFE)", "complex I MWFE subunit	Xq24	NM_004541	mitochondrial resp. chain NADH dehydrogenase component	trichothiodystrophy, keratitis, optic nerve disease, mitochondrial def	many, heart, NS	pineal, IS: all; heart	many	many, heart	N	0
20372	NDUFB11	NADH:ubiquinone oxidoreductase subunit B11	ESSS, NP17.3, Np15 "complex I NP17.3 subunit"	Xp11.3	NM_019056	mitochondrial resp. chain NADH dehydrogenase component	lethal neonatal, cardiomyopathy, many other	many, heart, bone	heart	many, muscle	many	N	8
29433	NEXMIF	neurite extension and migration factor	KIAA2022, XLMR Protein Related To Neurite Extension, XPN, MRX98	Xq13.3	NM_001008537	neurite outgrowth, cell-cell signaling via N-cadherin and ITGb	mental retardation, epilepsy, pyelitis (Renal infection: IS)	NS	non-spec	unreliable	brain	N/Y	2
7820	NHS	NHS actin remodeling regulator	Nance-Horan Syndrome (Congenital Cataracts And Dental Anomalies), Congenital Cataracts And Dental Anomalies Protein, CTRCT40	Xp22.2-p22.13	NM_198270	actin remodelling regulator + pseudopodia formation: eye, brain, tooth, face embryology	Nance Horan syndrome: cataracts + dental problems, mental retardation	adipose tissue, adrenal, reprod.	PMN	unreliable	endometrium, kidney, adrenal, tesits	N	10
33737	NHSL2	NHS like 2	NHS-Like Protein 2	Xq13.1	NM_001013627	unknown	none	IS: PBMC, monocytes, Tc; esophagus, testis	PMN	unreliable	gall bladder	N/Y	0
29873	NKAP	NFKB activating protein	FLJ22626, "NF kappaB activating protein"	Xq24	NM_024528	transcriptional repressor of Notch-signaling for T cell development; also involved in TNFa + IL-1 signaling	none	PBMC, DT, adrenal, placenta	IS: leukos, APC (mo, mph, DC, B)	many, non-spec	many, non-spec	Y	1
19374	NKRF	NFkB repressing factor	ITBA4, NRF	Xq24	NM_017544	transcriptional repression NFkB responsive genes, silencing IFN-b rec, cytokine-induced iNOS induction, regulation IL-8 transcription	cardiomyopathy, familial	many: lung, monocytes, PBMC	NS; pineal, hypothalamus, PFC; IS: lymphos	NS	brain, LN	Y/N	2
14289	NLGN3	neuroligin 3	HNL3, KIAA1480, ASPGX1, AUTSX1	Xq13.1	NM_018977	neuronal cell-cell interaction	schizophrenia associated, autism, Asperger	NS: brain; testis	NS	NS+++	brain	N	2
14287	NLGN4X	neuroligin 4 X-linked	NLGN4 KIAA1260, NLGN, HLNX	Xp22.32-p22.31	NM_020742	neuronal cell-cell interaction	schizophrenia associated, autism, Asperger	NS: FC, brain, retina; testis	NS	NS (muscle, fem Reprd)	NS, brain, Fem reprod	N	2
29887	NLRP2B	NLR family pyrin domain containing 2B	NLRP2P NOD24, NALP2P, CLRX.1, POP4	Xp11.21	NG_002752	maybe neg. Regulation NFkB, altering TLR signaling and innate IR	none	many, incl. IS	ND	ND	ND	Y/N	0
7871	NONO	non-POU domain containing octamer binding	NRB54, NMT55, P54NRB, P54, PPP1R114 "Nuclear RNA-binding protein, 54-kD", "non-Pou domain-containing octamer (ATGCAAAT) binding protein", "protein phosphatase 1, regulatory subunit 114	Xq13.1	NM_007363	transcription reguluation; role in innate IR against DNA virus	mental retardation, cancers, pyomyositis = rare bacterial infection skelMuscle	many; IS.. LN; ovary, m	IS: thymus, leucos; NS: pineal	many	many	Y/N	0
7889	NOX1	NADPH oxidase 1	NOH1, NOH-1, MOX1, GP91-2 "mitogenic oxidase (pyridine nucleotide-dependent superoxide-generating)", "NADPH oxidase homolog-1", "NADPH oxidase 1 variant NOH-1L"	Xq22.1	NM_007052	respiratory burst; V-gated proton channel, pH control in phagocytes + other cells	synucleinopathy, CGD, vascular disease, retinitis pigmentosa	DT, secretome	DT: colon; cerebellum	unrel. DT	colon	Y	1	pmid29091079 : IBD
7960	NR0B1	nuclear receptor subfamily 0 group B member 1	AHC, DSS DAX1, AHCH	Xp21.2	NM_000475	orphan nuclear (steroid/thyroid/retinoid) receptor, suppression steroid synthesis	adrenal hypoplasia congenita , sex-reversal, hypogonadism	Ns: hypothalamus, pituitary; endocrine: adrenal; lung, testis	testis, PNS, muscle	unrel. Testis, adrenal	testis, adrenal	N	3
25391	NRK	Nik related kinase	DKFZp686A17109	Xq22.3	NM_198465	may phosphorylate for actin organization; TNFa-signaling	cerebral/head gigantism; musculoskeletal hypermobility syndrome, Sotos syndrome:	ovary, adrenal, plasma,	non-spec	unrel. Reprod.	adrenal, female reprod	N	10
13398	NSDHL	NAD(P) dependent steroid dehydrogenase-like	XAP104, H105e3, SDR31E1 "short chain dehydrogenase/reductase family 31E, member 1"	Xq28	NM_015922	methyl removal in cholesterol syntesis	chondrodysplasia, limb defects, cognitive impairmente, disorder lipid metabolism	NS, nasal epithelium, heartl,	adrenal, adipose tissue, bronchial-epitheliasl	many, liver	adrenal, esophagus	N	0
17621	NUDT10	nudix hydrolase 10	DIPP3a, hDIPP3alpha	Xp11.22	NM_153183	endopolyphosphatase activity, hydrolase activity	autoimmune disease of the endocrine system	reprod; NS, PBMC, adrenal	embryonic, spermatocytes,	endocrine; testis, IS: IR+		Y/N	0
18011	NUDT11	nudix hydrolase 11	DIPP3b, FLJ10628, hDIPP3beta	Xp11.22	-	endopolyphosphatase activity, hydrolase activity	none	fetal: heart, NS; NS, heart, testis	testis, fetal brain, embryonic, oocytes: NK	NS, endocrine, testis	testis, brain	N	0
25960	NUP62CL	nucleoporin 62 C-terminal like	FLJ20130	Xq22.3	NM_017681	nuclear pore protein	none	testis, adrenal, GIT, BM	non-spec (testis9	NS: neurons; endocrine: adrenal, thyroid; reprod: gametes	testis; endocrine: adrenal, thyroid	N	0
8072	NXF2	nuclear RNA export factor 2	CT39, TAPL-2 "cancer/testis antigen 39", "TAP like protein 2	Xq22.1	NM_017809	nuclear mRNA export factor	none	testis, pituitary, NS, skin	non-spec. Many	unreliable, many	testis	N	7
23984	NXF2B	nuclear RNA export factor 2B	bA353J17.1	Xq22.1	-	nuclear mRNA export factor	none	reprod: testis, pituitary, NS	non-spec: many	unreliable	testis	N	7
8073	NXF3	nuclear RNA export factor 3	-	Xq22.1	NM_022052	tissue specific nuclear mRNA export factor	none	reprod., NS	testis (lymphoblastoma)	reprod (gametes)	testis	N	7
8075	NXF5	nuclear RNA export factor 5	-	Xq22.1	-	mRNA nuclear export, protein export, mRNA localization in neurons	mental retardation & short stature (1 px)	NS, breast	ND	unrel. Many	testis	N	2	Bgee
18151	NXT2	nuclear transport factor 2 like export factor 2	P15-2	Xq23	NM_018698	mRNA nuclear export, protein export	diversion colitis; IBD (IFN signalling)	ovary, bone, BM, LN, spleen PBMC	testis, IS: DC, NK	LN:IR+++, spec cells, many: NS testis IR+	testis	Y	1
8082	NYX	nyctalopin	CSNB1, CSNB4 CLRP, CSNB1A	Xp11.4	NM_022567	may be a protein kinase inhibitor	abnormal macular pigmentation, myopia, night blindness	kidney, testis, NS, eye	many, heart	ND	kidney, testis, NS	N	2
8108	OCRL	OCRL, inositol polyphosphate-5-phosphatase	OCRL1	Xq26.1	NM_000276	may function in lysosomal trafficking by regulation of phosphatidylinositol pool	affects NS (mental retardation), kidney (Dent disease: phosphaturemia, acidosis, bone deformation, hypotonia	NS, kidney, muscle, mesoderm derivatives	pituitary, testis, heart	unrel. Many	adrenal, reprod	N	0
2567	OFD1	OFD1, centriole and centriolar satellite protein	CXorf5, RP23 71-7A, JBTS10	Xp22.2	NM_003611	cilia assembly, centrosome/centriole assembly, needed for development & homeostasis; OFD1 = oro-facial-digital syndrome protein 1	enhances celiac disease, embryologic face anomalies, acerebellar, fibrosis	fetal ovary, monocytes, many	LN, DC+++++, NK; lymphos, all, pineal (bit)	thyroid/parathyroid	many: LN	Y/N	10
8127	OGT	O-linked N-acetylglucosamine (GlcNAc) transferase	O-GLCNAC, HRNT1, MGC22921, FLJ23071, OGT1	Xq13.1	NM_003605, NM_181672	glycosylation; chromatin structure, insulin resistance, circadian oscillation of CLOCK genes	Mental retardation, Alzheimer,	many; IS: LN; NS: PFC	many; IS: LN; NS: PFC, pineal;	many,	many: IS: LN, spleen	N/Y	0
8148	OPHN1	oligophrenin 1	MRX60 OPN1, ARHGAP41	Xq12	NM_002547	stabilizaton (Glu)AMPA-rec synaptic vesicle endocytosis at presynaptic mb	mental retardation; NS problems	NS	non-spec: many	unrel: many	brain, prostate	N	2
9936	OPN1LW	opsin 1, long wave sensitive	CBBM, RCP, CBP COD5 "cone dystrophy 5 (X-linked)	Xq28	NM_020061	mediate vision; photo receptor	color blindness, cone dystrophy, etc	eye	NS: face recognition; saliva; IS: BM immature	ND	testis	N	2
4206	OPN1MW	opsin 1, medium wave sensitive	GCP, CBBM, CBD OPN1MW1, COD5 "cone dystrophy 5 (X-linked)"	Xq28	NM_000513	mediate vision; medium wave length sensitivity	color blindness, cone dystrophy, etc	eye	NS: face recognition; saliva; IS: BM immature	ND	testis skin	N	2
26952	OPN1MW2	opsin 1, medium wave sensitive 2	-	Xq28	NM_001048181	visual pigment, light absorption	none	eye	NS: face recognition; saliva; IS: BM immature	ND	testis, skin appendix,	N	2
51831	OPN1MW3	opsin 1, medium wave sensitive 3	-	Xq28	-	visual pigment, light absorption	none	ND	NS: face recognition; saliva; IS: BM immature	ND	testis, skin appendix,	N	2
14755	OR13H1	olfactory receptor family 13 subfamily H member 1	-	Xq26.2	-	odorant receptor (Olfactory rec gene fam = largest in genome)	none	ND	ND	ND	ND	N	2
8512	OTC	ornithine carbamoyltransferase	-	Xp11.4	-	ornithine-carbamoyl transferase, urea cycle; mitochondria	urea cycle; hyperammonemic coma	liver, intestine	liver, salive	liver, GIT	liver, GIT	N	4
25402	OTUD5	OTU deubiquitinase 5	DKFZp761A052, DUBA	Xp11.23	NM_017602	negative regulator of the IS; deubiquinating enzyme	none	retina, fetal liver, PB leukos	IS: leukos; epithelia	many	NS: brain; IS: spleen	Y	1
32312	OTUD6A	OTU deubiquitinase 6A	FLJ25831, HSHIN6, DUBA2	Xq13.1	NM_207320	deubiquinating enzyme	none	testis, bone	ND	testis	ND	N	7
8542	P2RY4	pyrimidinergic receptor P2Y4	NRU, P2Y4, UNR, P2P	Xq13.1	NM_002565	signal transduction via Ca2+; UTP + UDP-GPC receptors	none	intestine: ileum, pancreas; skin	epithelia	unreliable	ND	N	0
15524	P2RY8	P2Y receptor family member 8	P2Y8	Xp22.33 +Yp11.3	NM_178129	down-regulation on granulocyte regulation; putative receptor for G-prot-coupled purines	none	IS: leukos, heart, kidney	IS: leukos	IS	IS	Y	1
19906	P2RY10	P2Y receptor family member 10	P2Y10	Xq21.1	-	putative receptor for G-prot-coupled purines	none, associated rheumatoid arthritis	IS, leukos:B	IS: leukos	IS	IS	Y	1
27989	PABPC1L2A	poly(A) binding protein cytoplasmic 1 like 2A	RBM32A	Xq13.2	NM_001012977	RNA binding, control expression	none,	IS: LT; NS, heart	NS, entorhinal cortex	unrel. NS		N	2
31852	PABPC1L2B	poly(A) binding protein cytoplasmic 1 like 2B	RBM32B	Xq13.2	NM_001042506	RNA binding, control expression	none,	NS	NS, entorhinal cortex	unrel: NS	ND	N	2
13629	PABPC5	poly(A) binding protein cytoplasmic 5	PABP5	Xq21.31	NM_080832	regulation of expression via binding to polyA-mRNA	none, but associates with ANA-vasculitis	ovary, NS: brain	saliva, tissue-resident lymphocytes (Tc, NK, B), AT, ovary, endometrium	unrel. many	(RNA: ovary, adrenal)	Y/N	0
4107	PAGE1	PAGE family member 1	GAGEB1 PAGE-1, GAGE-9, CT16.3	Xp11.23	-	unknown	none (lymphoblast cell line)	reprod	non-spec	gametes		N	7
31804	PAGE2	PAGE family member 2	GAGEC2 MGC62094, PAGE-2, CT16.4	Xp11.21	NM_207339	unknown	none (androgenetic alopecia=	testis	ND	testis		N	7
31805	PAGE2B	PAGE family member 2B	CT16.5	Xp11.21	XM_372224	unknown	none	testis	ND	testis		N	7
4110	PAGE3	PAGE family member 3	GAGED1 PAGE-3, CT16.6	Xp11.21	XM_060054	unknown	none	testis	few (PNS, skelMuscle)	unreliable		N	7
4108	PAGE4	AGE family member 4	GAGEC1, PAGE-4, CT16.7	Xp11.23	-	unknown	testicular & prostate cancer	reprod (male & female)	placenta; hepatocytes	reprod		N	7
29992	PAGE5	PAGE family member 5	PAGE-5, CT16.1, CT16.2	Xp11.21	NM_130467	unknown	none	reprod (male & female)	testis, spermatocytes	testis		N	7
8592	PAK3	p21 (RAC1) activated kinase 3	MRX30, MRX47 hPAK3, bPAK	Xq23	NM_002578	Serine/threonine protein kinase; signal transduction; Phosphorylates MAPK4 and MAPK6; neural development, cell cycle, dendrite spine morphogenesis	mental retardation	CNS: brain (fetal; post-mitotis)	pancreas, brain	CNS: brain, cerebellum,	brain, pancreas, thyroid	N	2
20686	PASD1	PAS domain containing repressor 1	CT63 "cancer/testis antigen 63"	Xq28	NM_173493	nuclear repressor of circadian biorhythm	diffuse large B-cell lymphoma	reprod.	ND	testis	testis	N	7
28790	PBDC1	polysaccharide biosynthesis domain containing 1 Approved	CXorf26 MGC874	Xq13.3	NM_016500	unknown; ALS-association	none	PBMC, liver	IS: NK, Tc, B, Th (lymphos)	unreliable	D T, liver	N/Y	0	ubiquitously expressed, preferred expression in NK (BioGPS)not supported by other expression databases
8656	PCDH11X	protocadherin 11 X-linked	PCDH11 PCDH-X, PCDHX, PPP1R119 "protein phosphatase 1, regulatory subuni	Xq21.31	NM_032969	may be Ca2+-dep cell adhesion	Dyslexia, schizoaffective disorder.	CNS: brain, breast	NS; Muscle, testis	pancreas, fem. reprod; endocrine	brain, ovary	N	2
14270	PCDH19	protocadherin 19	EFMR KIAA1313, EIEE9	Xq22.1	NM_020766	may be Ca2+-dep cell adhesion	Epileptic encephalopathy, Early Infantile, 9 and childhood absence epilepsy.	brain, stomach	non-spec	brain	brain	N	2
17301	PCSK1N	proprotein-convertase subtilisin/kexin type 1 inhibitor	SAAS, SgVIII, SCG8, proSAAS, PEN, BigLEN	Xp11.23	NM_013271	proteolytic cleavage of neuroendocrine peptide precursors.	Amyotrophic Lateral Sclerosis-parkinsonism/dementia complex	pituitary, brain, pancreas	pituitary,pancreas, CNS	pituitary,pancreas, CNS	kidney, brain	N	3
8755	PCYT1B	phosphate cytidylyltransferase 1, choline, beta	CCT-beta, CTB	Xp22.11	NM_004845	Controls phosphatidylcholine synthesis	none	reprod.	non-spec	unreliable (RNA: brain; reprod)	brain, testis	N	0
8806	PDHA1	pyruvate dehydrogenase E1 alpha 1 subunit	PDHA "pyruvate dehydrogenase E1 component subunit alpha, somatic form, mitochondrial"	Xp22.12	-	conversion pyruvate to acetyl-CoA; links glycolysis to TCA cycle	Dehydrogenase defM Leigh syndrome + leukodystrophy; Neurologic dysfunction	heart, muscle, brain	adipose, pineal, NS: PFC; IS: NK, myeloid, hematopoyetic	many, non-spec	heart	N	0
8811	PDK3	pyruvate dehydrogenase kinase 3	-	Xp22.11	NM_005391	Inhibits pyruvate dehydrogenase activity by phosphorylation	Charcot-Marie-Tooth disease = disorder PNS; demyelination, neuropathy	testis, PBMC, heart, muscle, spinal cord	non-spec (lymphoblast cell line)	many (tonsil)	brain, GIT, testis, kidney	N	0
21167	PDZD4	PDZ domain containing 4	PDZK4 KIAA1444, LU1, FLJ34125, PDZRN4L, LNX5	Xq28	NM_032512	unknown (ubiquitin ligase?)	none	brain, liver, adipose	NS: fetal; NK	NS; IS: LN_germ center	brain	N/Y	2
28034	PDZD11	PDZ domain containing 11	PDZK11	Xq13.1	NM_016484	unknown	Purulent acute otitis media, middle ear disease, Pleomorphic adenoma	many	ND	many	many, non-spec	N/Y	0
8872	PFKFB1	6-phosphofructo-2kinase/fructose-2,6-biphosphatase 1	PFRX	Xp11.21	-	synthesis and degradation of fructose 2,6-bisphosphate	hepatocellular carcinoma	muscle, adipose, liver, heart	liver, PNS, muscle	ND (RNA: muscle, adipose)	fat, liver	N	0
21731	PGAM4	phosphoglycerate mutase family member 4	dJ1000K24.1, PGAM3, PGAM-B, PGAM1	Xq21.1	NM_001029891	2-phospho-D-glycerate	Menkes disease = abnormal Cu2+ accumulation: seizures, hair	lung, brain	ND	unreliable	ND	N	0
8896	PGK1	phosphoglycerate kinase 1	-	Xq21.1	-	glycolytic, polymerase cofactor, sperm motility	anemia, myopathy, neurological problems	spermatogonia, blood, skin	muscle, NS: pineal; Is: myeloid, monocytes, DC	many: endocrine, IS, reprod	many: appendix, BM	Y/N	0
16090	PGRMC1	progesterone receptor membrane component 1	HPR6.6	Xq24	NM_006667	progesterone binding	larynx cancer; eustachian tube (pharyngeal arches)	Many: kidney, liver; nasal epithelium, bone, fetal testis	many: NS + other	many:reprod., liver	liver, kidney	N	0
8918	PHEX	phosphate regulating endopeptidase homolog X-linked	HYP, HPDR PEX, HPDR1, HYP1, XLH	Xp22.11	NM_000444	phosphate homeostasis; bone & dental mineralization, renal phosphate reabsorption	rickets, hypophosphatemia, bone problems, muscular hypotonia	bone, lung, brain	IS: DC	ND	lung, repro	N	9	role DC!!!!
18145	PHF6	PHD finger protein 6	BFLS, BORJ KIAA1823, MGC14797, CENP-31 "centromere protein 31	Xq26.2	NM_032458	rRNA expression regulation, transcription factor	mental retardation, gynecomastia, IL7R-def, bone	ubiquitous: lung, BM	salivary gland	many	ovary, LN	N	2	many
20672	PHF8	PHD finger protein 8	NF422, KIAA1111, JHDM1F, KDM7B "jumonji C domain-containing histone demethylase 1F", "histone lysine demethylase PHF8	Xp11.22	NM_015107	rDNA transcription, cell cycle control	mental retardation, cleft lip	lung, testis, plasma	sup.cerv.ganglion	many	testis	N/Y	2	thymus biogps Not in ohter databases
8925	PHKA1	phosphorylase kinase regulatory subunit alpha 1	PHKA	Xq13.1	-	phosphorilation troponin and calmodulin	glycogen storage disases	muscle,	non-spec: retina	muscle, parathyroid	endocrine	N	9
8926	PHKA2	phosphorylase kinase regulatory subunit alpha 2	PHK, PYK	Xp22.13	NM_000292	phosphorilation troponin and calmodulin	glycogen storage disases	liver	liver, IS: BM, LN, IS: myeloid, HSC	liver, GIT, IS; LN	many: reprod, adipose	N/Y	0
8957	PIGA	phosphatidylinositol glycan anchor biosynthesis class A	GPI3 "paroxysmal nocturnal hemoglobinuria", "phosphatidylinositol N-acetylglucosaminyltransferase	Xp22.2	NM_002641	GPI-anchor formation; synthesis NacGln-phosphatidyl-inositol	Paroxysmal nocturnal hemoglobinuria 1, multiple congenital anomalies	serum, BM, blood	IS: myeloid	many	many: BM	N	0
28570	PIH1D3	PIH1 domain containing 3	CXorf41 MGC35261, NYSAR97, DNAAF6, TWISTER "sarcoma antigen NY-SAR-97", "dynein axonemal assembly factor 6	Xq22.3	NM_173494	cytoplasmic pre-assembly of axonemal dynein	ciliar dyskinesia, Kartagener syndreom	testis, GIT, many	non-spec	lung, reprod	testis, lung	N	5
8987	PIM2	Pim-2 proto-oncogene, serine/threonine kinase	-	Xp11.23	-	cell survival, proto-oncogen; IKB/NFkB-MAPK signaling cell cycle factor kinase	lymphoma, cancer	blood, spleen, heart	IS: Leucos; cancer	ND (RNA: IS	IS	Y	1
8992	PIN4	peptidylprolyl cis/trans isomerase, NIMA-interacting 4	PAR14, PAR17, EPVH, "parvulin"	Xq13.1	NM_006223	rRNA processing	none	ubiquitous; heart, skin, PBMC	IS: leucos; Pineal	many: non-spec	ND	Y/N	0	investigate	Art Tanaka	primAutoimmuneCholanitis		unique to humans?
30048	PIR	pirin	-	Xp22.2	NM_003662	coregulator NFkB; myleomonocytic development	personality & phobic problems, cyclothymic disorder	tonsil, melanomas	lung, retina, HSC	endocrine, liver	fat, urinary bladder	Y/N	0
16648	PJA1	praja ring finger ubiquitin ligase 1	FLJ11830, RNF70	Xq13.1	NM_145119	ubiquitination & degradation of proteins regulator	craniofrontonasal syndrom	bone, testis, NS	NS, IS: NK, B; endocrine, reprod, e	many	brain, testis, endocrin	N	2
9044	PLAC1	placenta specific 1	CT92, OOSP2L, OOSP2B, "cancer/testis antigen 92	Xq26.3	NM_021796	placental development	pre-eclampsia	placenta, esophagus	placenta	placenta	placenta	N	7
23148	PLCXD1	phosphatidylinositol specific phospholipase C X domain containing 1	FLJ11323	xp22.33 + Yp11.31-2	NM_018390	unknown but mainly in CD34+ cell, Tc, Th y leucemia	none	lung, skin	Tc, Th, HSC	reprod., CNS, thyroid, LT	skin, BM, GIT, spleen	N	0
9086	PLP1	proteolipid protein 1	SPG2, PLP, GPM6C, "Pelizaeus-Merzbacher disease	Xq22.2	-	major myelin protein (lipophilin)	mental/neurological; spastic paraplegia	CNS	NS	NS	brain	N	2
9087	PLP2	proteolipid protein 2	A4, A4-LSB, MGC126187, "A4 differentiation-dependent protein"	Xp11.23	NM_002668	intestinal epithelium	choline deficiency, neuronal ceroid lipofucsinosis	PNS, mucosa colon, blood	resp epithelium, BM; thymus; IS: innate + B	NS, GIT, kidney	skin, esophagus, BM	Y/N	0
9091	PLS3	plastin 3	T-plastin	Xq23	-	actin_microvilli-stereocilio, filopodia; bone formation	bone mineral density, osteoporosis, juvenile spinal muscular atrophy	many	liver, thyroid, uterus, CNS	many	thyroid, lung, uterus	N	9
9101	PLXNA3	plexin A3	PLXN4, SEX, XAP-6, 6.3, Plxn3	Xq28	NM_017514	coreceptor semaphorins; cytoskeleton remodeling, apoptosis, axon growth	childhood-onset schizophrenia	BM mesenchyme, fetal brain	fetal brain, olfactory buld	skin	skin, female reprod	N	10
9105	PLXNB3	plexin B3	PLXN6, PLEXR, PLEXB3	Xq28	-	axon guidance, invasive growth	glioma	PBMC, NS	CNS	NS	brain	N	2
13415	PNCK	pregnancy up-regulated nonubiquitous CaM kinase	MGC45419, CaMK1b	Xq28	NM_198452	Ca-Calmodulin-dep kinase	Jervell and Lange-Nielsen syndrome = deafness; conductance heart problem	colon, brain, plasma, liver	ND	NS, GIT,	brain, reprod	N	0
18742	PNMA3	PNMA family member 3	MA5, MA3, MGC132756, MGC132758 "paraneoplastic cancer-testis-brain antigen	Xq28	NM_013364	unknown (possible frameshift heptant shift to signal ribosome)	CD3zeta def	CNS, retina, fetal testis	CNS; thalamus, adrenal	brain, reprod	brain, testis	N	2
18743	PNMA5	PNMA family member 5	KIAA1934, "paraneoplastic antigen family 5"	Xq28	NM_052926	unknown	none	brain, bone, testis	ND	testis (RNA: brain, testis)	brain, testis	N	0
28248	PNMA6A	PNMA family member 6A	PNMA6C MGC15827	Xq28	NM_032882	unknown	thyroid disease	NS, heart	NS;: retina, amygdala	unreliable (brain)	brain, kidney, liver	N	0
50767	PNMA6E	PNMA family member 6E	-	Xq28	-	unknown	none	ND	ND	ND	ND	N	0
53119	PNMA6F	PNMA family member 6F	PNMA6BL	Xq28	-	unknown	none	ND	ND	ND	brain, adrenal	N	0
24887	PNPLA4	patatin like phospholipase domain containing 4	DXS1283E, GS2, iPLA2eta	Xp22.31	NM_004650	lipid hydrolase; adipocyte homeostasis	mitochondrial disorder, orofaciodigital anomalies	fetal tissues, gonads	many: NS + thyroid	endocrine, IS		N/Y	3
13711	POF1B	POF1B, actin binding protein	POF, FLJ22792	Xq21.1	NM_024921	epithelial monolayer organization & ovary development	ovarian failure	embryonic; tooth + hair, skin, cervix	heart, GIT, NS	epithelia	skin, GIT (epithelia	N	5
9173	POLA1	DNA polymerase alpha 1, catalytic subunit	POLA, NSX, p180	Xp22.11-p21.3	NM_016937	cytosolic short DNA strand DNA pol without 3´exonuclease activity; prevents spontaneous activation of IFN-I response	recurrent infection and sterile inflammation, reticulate pattern hyperpigmentation, syphilis; netherton syndrome (=skin, eye, otorhinolaryngolical and immune def (Cresta neural, somitomers)	skin, IS, thyroid	HSC	BM, LN, reprod	BM, LN, appendix	Y/N	0	inflammation induced because of longlasting RNA-DNA hybrids, not because it controls immune system
17652	PORCN	porcupine O-acyltransferase	DHOF, MG61, PORC, PPN, por	Xp11.23	NM_022825	Protein-serine O-palmitoleoyltransferase that acts as a key regulator of the Wnt signaling pathway	FODH (=ectomesodermal disorder)	adrenal, testis, retina	adrenal, lung, pineal (day)	adrenal, reprod., NS	adrenal, NS	N	3
9217	POU3F4	POU class 3 homeobox 4	DFN3, BRN4, OTF9, DFNX2, "brain-4", "Octamer-binding transcription factor 9	Xq21.1	NM_000307	early neural development	deafness	embryonic endocrine, NS	non-spec	unreliable (brain)	ND	N	10
9243	PPEF1	protein phosphatase with EF-hand domain 1	PPEF, PPP7CA, "protein phosphatase 7, catalytic subunit, alpha isozyme	Xp22.13	NM_006240	adaptation response to photorec	retinal problems	NS, spinal cord, testis	testis	unreliable	testis	N	2
16324	PPP1R2C	PPP1R2C family member C	PPP1R2P9, I-4	Xp11.3	-	phosphates inhibitor	none	none	testis	ND (RNA: testis)	ND	N	0
14944	PPP1R2F	protein phosphatase 1 regulatory subunit 3F	Hb2E	Xp11.23	NM_033215	no data						N	0
13417	PPP2R3B	protein phosphatase 2 regulatory subunit B''beta	PPP2R3L PPP2R3LY, PR48, PR70	Xp22.3 + Yp11.3	NM_013239	Br-regulatory unit may regulate substrate specificity of phosphatase	none	testis, fetal liver	heart	ND (RNA: muscle)	heart, testis	N	8
33146	PPP4R3C	protein phosphatase 4 regulatory subunit 3C	SMEK3P, PPP4R3CP, FLJ32867, FLFL3P, smk1	Xp21.3	NR_002784	unknown	none	ND	PNS, muscle, testis	ND (RNA: testis)	ND	N	0
9330	PQBP1	polyglutamine binding protein 1	RENS1, MRXS8, SHS, MRX55, MRX2, MRXS3	Xp11.23	NM_001032381.1	mRNA splicing, innate immune to dsRNA = sensor virus infection, innate immunity, neuronal development	mental retardation, microcephaly; virus infection susceptibility	ubiquitous: PBMC, NS	pineal; IS: thymus, leukos: DC, lymphos	non-spec	many: ovary	Y	0	investigate !!!!!
28911	PRAF2	PRA1 domain family member 2	JM4, Yip6a	Xp11.23	NM_007213	GA and vesicular trafficking; pro-apoptopic	neuroblastoma	ubiquitous: nasal epithelium, fetal testis,	NS, endocrine, muscle	NS, testis, IS	brain	N	0
17169	PRDX4	peroxiredoxin 4	AOE37-2	Xp22.11	NM_006406	thiol-spec peroxidase, cell protection against oxidative stress, Regulates NFkB	hypoascorbemia	testis (fetal), pancreas, liver	liver, pancreas, muscle (NS, IS)	pancreas, testis	pancreas, testis, liver	N	0
6645	PRICKLE3	prickle planar cell polarity protein 3	LMO6	Xp11.23	NM_006150	polarization epithelial cells and neurons	neurological disease, night blindness	ubiquitous: PBMC	non-spec	unreliable (many epithelia)	skin, esophagus, BM	N	5
9441	PRKX	protein kinase X-linked	PKX1	Xp22.33	NM_005044	myeloid cell differentiation via SMAD6; S/T kinase, cellular/epithelial differentiation	klinefelter syndrome, lung carcinoma	ubiquitous: thyroid, lung, spleen, kidney	IS: leukos Th, Tc, NK, others ; thyroid	non-spec	thyroid	Y/N	10
9462	PRPS1	phosphoribosyl pyrophosphate synthetase 1	DFN2, CMTX5, DFNX1, "PRS I", "ribose-phosphate diphosphokinase 1	Xq22.3	-	nucleotide synthesis	deafness, mental	LN, blood, kidney	IS	unreliable (LN, IS)	thyroid, LN, brain	Y/N	0
9465	PRPS2	phosphoribosyl pyrophosphate synthetase 2	PRS II", "ribose-phosphate diphosphokinase 2	Xp22.2	NM_002765	nucleotide synthesis	none	reprod, LN	reprod, IS	endocrine, gonads	testis	N	0
34498	PRR32	proline rich 32	CXorf64	Xq25	NM_001122716	unknown	none	NS, brain	non-spec	ND	esophagus, heart, prostate	N	0
9469	PRRG1	proline rich and Gla domain 1	PRGP1	Xp21.1	NM_000950	unknown	none	spinal cord	NS: spinal cord	unrel (RNA: brain, reprod, kidney, adipose)	brain, thyroid	N	2
30798	PRRG3	proline rich and Gla domain 3	TMG3	Xq28	NM_024082	unknown	none	NS, heart, testis	heart, liver sup.cerv.gangl. Endo	unrel (RNA: brain, reprod)	brain, reprod	N	0
9555	PSMD10	proteasome 26S subunit, non-ATPase 10	p28, "gankyrin"	Xq22.3	NM_170750	chaperone 26S proteasome; prolonged AKT activation; RAS-related tumorigenesis	hepatocellular carcinoma	many, upregulated cancers	NS, IS: DC, B, monocytes; lung, muscle	testis , many	many, non-spec	N	0
26392	PTCHD1	patched domain containing 1	FLJ30296	Xp22.11	NM_173495	critical for thalamocortical transmission, generation of sleep rhythms, sensorimotor processing and attention.	intellectual disability, autism	CNS	NS	unreliable (CNS)	NS	N	2	interesting!!! Thalamic processing
16818	PUDP	pseudouridine 5'-phosphatase	FAM16AX, HDHD1A, HDHD1 DXF68S1E, GS1	Xp22.31	NM_012080	involved in rRNA degradation	none	NS, intestine, blood	IS: myeloid, monocytes	many, endocrine	many, non-spec	Y/N	0
26583	PWWP3B	PWWP domain containing 3B	MUM1L1 FLJ33516	Xq22.3	NM_152423	unknown; mutated melanoma-associated Ag1-like protein 1	none GWAS: (alcoholic) pancreatitis	reprod.	gonads, platelets	uterus, ovary	gonads	N	7
9792	RAB9A	RAB9A, member RAS oncogene family	RAB9	Xp22.2	NM_004251	transfer between endosome and GA, lysosoma, phagocytic vesicle; melanosome trafficking	none	PBMC, bone, many	IS: NK, myeloid, monocytes	many	adrenal	/N	0
14090	RAB9B	RAB9B, member RAS oncogene family	RAB9L	Xp22.2	-	transfer between endosome and GA, melanosome trafficking	none	brain, fetal testis, heart, brain	ND	brain, endocrin, muscle	heart, brain, esophagus	N	2	intercalated discs site; Heart proteinatlas			membrane transport vesicles
9773	RAB33A	RAB33A, member RAS oncogene family	RabS10	Xq26.1	NM_004794	unknown	deafness	NS: brain, spinal cord; PBMC	brain, (lymphoblast)	unreliable (RNA: brain)	brain, LN	N	2
16499	RAB39B	RAB39B, member RAS oncogene family	MRX72, WSN	Xq28	NM_171998	autophagy; routing from RER to GA; synaptic transmission	mental retardation, neurological	NS: brain (pancreas)	lung, muscle, uterurs	NS; GIT	brain, LN	N	2
18283	RAB40A	RAB40A, member RAS oncogene family	RAR2A, Rar-2	Xq22.2	-	mediates the ubiquitination and subsequent proteasomal degradation of target proteins	none	non-spec	myocyte, heart	ND (RNA: reprod. Male-female; esophagus)	male reprod, esophagus	N	0
25410	RAB40AL	RAB40AL, member RAS oncogene family	RAR2, RLGP, "Ras like GTPase"	Xq22.1	NM_001031834	ubiquitination & degradation of proteins regulator	mental retardation, non-syndromic deafness	brain (fetal), kidney	heart, liver sup.cerv.gangl. Endo	ND	ND	N	0
18293	RAB41	RAB41, member RAS oncogene family	-	Xq13.1	NM_001032726	ER-to-Golgi trafficking	none	brain, urine, reprod.	ND	unreliable: brain, reprod. Colon	brain, testis	N	0
25486	RADX	RPA1 related single stranded DNA binding protein, X-linked	CXorf57	Xq22.3	NM_018015	genome stability at replication forks	none	brain, stomach, lung, kidney	heart, PNS	unreliable, many	adrenal, brain, ovary	N	0
9835	RAI2	retinoic acid induced 2	-	Xp22.13	NM_021785	unknown; biogps: embryo dev	Nance-horan syndrome (=cataract + dental problems)	many: heart, brain, placenta	uterus, adipocyte, lung, retina	unreliable (NS)	reprod.	N	10
21165	RAP2C	RAP2C, member of RAS oncogene family	DKFZp313B211	Xq26.2	NM_021183	GTP-binding protein between inactive GDP and active GTP; may be involved in cytoskeleton regulation and SER-mediated gene transcription	none	many: Uterus, Tc, Th	uterus; innate IS: NK, myeloid	smooth muscle, uterus	uterus, BM	N/Y	0
9890	RBBP7	RB binding protein 7, chromatin remodeling factor	RbAp46 "G1/S transition control protein-binding protein RbAp46", "retinoblastoma-binding protein 7", "retinoblastoma-binding protein RbAp46", "histone acetyltransferase type B subunit 2", "retinoblastoma-binding protein p46	Xp22.2	NM_002893	chromatin remodeling during development	retinoblastoma	fetal ovary, kidney, liver	adrenal, IS: DC, NK; pineal	many, non-spec	adrenal, reprod	N	10	RBM3:	https://www.ncbi.nlm.nih.gov/pmc/articles/PMC5021741/
9900	RBM3	RNA binding motif protein 3	IS1-RNPL	Xp11.23	NM_006743	cold-inducible mRNA binding protein, enhances protein synthesis in hypothermy and hypoxia	none	nasal epithelium, hair follicle, lung, DT, ubiquitous	IS organs: leukos, retina, DT, muscle, resp.tract; islets	IS organs: germ center; retina, DT,	BM, appendix, LN, spleen, adipose, ubiquitous	Y/N	0	stress-induced increase in protein synthesis!	https://www.nature.com/articles/s41598-017-02473-x
9896	RBM10	RNA binding motif protein 10	DXS8237E, KIAA0122, GPATC9, ZRANB5, GPATCH9, S1-1	Xp11.3	NM_005676	mRNA splicing, incl NFkB promotors, inflammation involved	spinal cord ependymoma & glioma, lymphogranuloma venereum (bacterial infection), tarp syndrome (cardiovasc)	BM, PBMC	IS: leukos,thymus;pineal	ubiquitous, incl. IS	ovary, spleen, LN	Y/N	0	cancer, infection	doi:10.1093/intimm/dxx067
25617	RBM41	RNA binding motif protein 41	FLJ11016	Xq22.3	NM_018301	unknown ; biogps: splicing	none	spinal cord	NS, muscle, adrenal, HSC	lver: bile tubules; fem reprod	many, non-spec	N	0
9910	RBMX	RNA binding motif protein X-linked	RNMX, hnRNP-G, HNRNPG "heterogeneous nuclear ribonucleoprotein G	Xq26.3	NM_002139	supraspliceosome, tumor suppression, motor neuron survival, IL-1B signaling; association autoimmunity	mental retardation; association autoimmunity	NS, nasal epithelium, many	thymus, IS: leucos, pineal, GIT,	ubiquitous, incl. IS	ovary, placenta, LN	Y/N	0	non-spec importance	interacts with MAP2K3 on 17p11 = sensitive area for FM
24282	RBMX2	NA binding motif protein X-linked 2	CGI-79, Snu17	Xq26.1	NM_016024	splicing motifs	none	adrenal, PBMC, lung, liver	LB, pineal, heart, liver, PNS	NS, lung	many, non-spec	N	0
26859	RBMXL3	RBMX like 3	CXorf55	Xq23	NM_001145346	unknown	none	heart, testis, adipocyte	non-spec	testis, gametes	ND	N	7
9959	RENBP	renin binding protein	RNBP, RBP , "N-acylglcNH2 2-epimerase", "GlcNAc 2-epimerase", "N-acetyl-D-glucosamine 2-epimerase"	Xq28	NM_002910	blood pressure regulation; renin inhibition, N-glycosylneuraminic acid degradation	hypertension; association SLE, RA, CD	serum, spleen, PBMC, blood	kidney, monocytes	IS: spleen: red pulp, LN:diffuse, liver (mph?) kidney: TCD + straight duct	kidney, spleen	N/Y	6	INVESTIGATE: FUNCTION LIVER, SPLEEN			LTEEG
9963	REPS2	RALBP1 associated Eps domain containing 2	POB1	Xp22.2	NM_004726	growth factor signaling in RaI signaling pathway	nance-horan syndrome (=cataract + dental problems), prostate cancer	PBMC, pancreas, liver	blood, endothelial, pineal (night)	NS, BM, lung, pancreas, testis, placenta, skin	brain, prostate, kidney, adrenal	N	0
9989	RGN	regucalcin	SMP30, RC, "senescence marker protein-30", "gluconolactonase	Xp11.3	NM_004683	gluconolactonase, modulates Ca++ signaling,	aging	adrenal, liver, heart	adrenal, liver, pineal	adrenal, liver, kidney	adrenal, liver, kidney	N	3
29993	RHOXF1	Rhox homeobox family member 1	OTEX, PEPP1	Xq24	NM_139282	spermatogenesis, transcription factor	none	testis, NS, plasma	testis	testis	testis (fat)	N	7
30011	RHOXF2	Rhox homeobox family member 2	THG1, PEPP-2, PEPP2, CT107,"cancer/testis Ag 107	Xq24	NM_032498	spermatogenesis, transcription factor	benign tumor: breast, thoracic	testis	ND	testis	testis	N	7
33519	RHOXF2B	Rhox homeobox family member 2B	-	Xq24	NM_001099685	spermatogenesis, transcription factor	none	testis	ND	testis	testis	N	7
26537	RIBC1	RIB43A domain with coiled-coils 1	FLJ32783	Xp11.22	NM_144968	unknown	CorneliaDeLange syndrome = neuronal, eye, bone, muscle anomalies	testis, heart	testis	unrel (reprod)	testis	N	10
25117	RIPPLY1	ripply transcriptional repressor 1	-	Xq22.3	-	somitogenesis (embryonic); rostrocaudal polarity	none	ND	non-spec	unreliable	liver, kidney	N	10
13429	RLIM	ring finger protein, LIM domain interacting	RNF12 NY-REN-43, MGC15161, "ring ZnF protein NY-REN-43Ag", "LIM domain interacting ring finger protein", "E3 ubiquitin-protein ligase RLIM"	Xq13.2	NM_016120	Random inactivation of X-chromosome via ubiquitination + degradation LIM cofactors	mental retardation	many	IS: leukos, Lympatic tissue, testis	many, incl. IS	BM, NS, thyroid	N	0
12974	RNF113A	ring finger protein 113A	ZNF183 RNF113, Cwc24	Xq24	NM_006978	unknown; orthologs in other species = spliceosome	trichothiodystrophy (hair-cutaneous, neurological)	ubiquitous, PBMC: lymphos; Tc, NK, Th; liver, NS	IS: thymus, LN: NK, B, Tc, Th, DC	many, incl. IS	ND	Y/N	0
21153	RNF128	ring finger protein 128, E3 ubiquitin protein ligase	FLJ23516, GRAIL	Xq22.3	NM_024539	inhibits IL-2 IL-4 expression; role anergy via ubiquitination	none	liver, adrenal, placenta	liver, endocrine, GIT	unreliable, many	GIT, liver	N/Y	3
10274	RP2	RP2, ARL3 GTPase activating protein	TBCCD2, NME10, NM23-H10	Xp11.3	NM_006915	trafficking between GA and ciliary mb; GTPase activating protein	retinitis pigmentosa, leber congenital amaurosis , fundus dystrophy (all = retina problems)	monocytes, bone, Eye, NS	blood, myeloid	unrel: spleen (RBC), BM, LN	BM, placenta, appendix	N/Y	0
30305	RPA4	replication protein A4	HSU24186	Xq21.33	NM_013347	part of alternative replication protein A complex; DNA repair; nt excision repair	babesiosis	testis, placenta, colon	non-spec	many, incl. IS	ND	N	0
10295	RPGR	retinitis pigmentosa GTPase regulator	CRD, RP3, RP15, COD1, CORDX1	Xp11.4	NM_000328	role in photoreceptor integrity and spermatogenesis; localized in GA, may be involved in vesicle transport may be guanine nt releasing factor, involved in ciliogenesis, role	retinitis pigmentosa	breast, eye, CSF, monocytes	muscle, PNS, liver, adrenal	liver, kidney, nasopharynx	testis, lung, fat	N	10
10298	RPL10	ribosomal protein L10	NOV, QM, DXS648E, DXS648, FLJ23544, L10	Xq28	NM_006013	ribosome, large subunit	mental retardation, autism, development disorder	ubiquitous, brain, nasoepithelium, liver, pancreas	ubiquitous; LN, thymus, IS: most leucos, others	ubiquitous, less muscle	ovary, BM, LN	N/Y	2
15848	SEPT6	septin 6	KIAA0128, SEP2, SEPT2, MGC16619, MGC20339	Xq24	NM_145802	actin skeleton organization (during cytokinesis, spermatozoids), HCV virus interference/use	male sexual disorder, nasopharyngitis	many; IS: LN, spleen, Tc; NS	IS, thymus, tonsil: Tc, Th, B, NK; testis; adrenal	IS, LN, spleen, tonsil; adrenal	LN, spleen, appendix, adrenal	Y	1
10359	RPL36A	ribosomal protein L36a	RPL44 L36A	Xq22.1	NM_021029	60S ribosomal subunit	none	Lung, NS, many	LN, IS, pancreas, ovary	unreliable	ovary, BM	N/Y	0
10350	RPL39	ribosomal protein L39	RPL39P42 L39	Xq24	NM_001000	ribosome constituent	lacrimal gland adenocarcinoma	eye, GIT, heart, muscle	ubiquitous; IS: myeloind; NS: fetal brain	unrel. Ubiquitous	ubiquitous, ovary, BM	N/Y	0
10424	RPS4X	ribosomal protein S4 X-linked	DXS306, CCG2, SCAR, SCR10, FLJ40595, RPS4, S4 "40S ribosomal protein S4, X isoform", "ribosomal protein S4X isoform", "single-copy abundant mRNA", "cell cycle gene 2"	Xq13.1	NM_001007	40S ribosomal protein, escaping X-inactivation	turner syndrome	ubiquitous, NS, liver, pancreas, nasoepithelium	pituitary, uterus, IS: B, Th, Tc, all leucos	ubiquitous, incl. IS	ubiquitous, ovary, thyroid, uterus, BM	N/Y	0
10432	RPS6KA3	ribosomal protein S6 kinase A3	MRX19, CLS RSK2, HU-3	Xp22.12	NM_004586	Ser/Thr-kinase, regulates mitogenic & stress response, survival	megaencephalus; mental retardation = neuronal, endocrine, bone mental	IS: LN; musculoskel, liver, NS	IS; Tc, Th, most; pineal, muscle	unrel: ubiquitous, incl. IS	appendix, LN; lung, coloon	Y/N	2
10435	RPS6KA6	ribosomal protein S6 kinase A6	RSK4	Xq21.1	NM_014496	Ser/Thr-kinase, growth factor indep; growth arrest signaling, inhibition durin embryogenesis	coffin-lowry syndrome = neuronal, endocrine, bone mental	many, NS	appendix; NS: pons, pineal	unrel. Many	thyroid, kidney	N	0	show doubtful, show liver proteinAtlas
19901	RRAGB	Ras related GTP binding B	-	Xp11.21	NM_016656	Guanine binding, amino acid availability control, mTORC1 signaling	parasitic helminthiasis infection	heart, PBMC; NS: PFC	ubiquitous; IS: myeloind; NS: pineal	mph weak,	brain, thyroid, ovary	N/Y	0
10457	RS1	retinoschisin 1	RS XLRS1	Xp22.13	-	binds charged lipids, cell-adhesion in retina	retinoschisis	NS: brain, retina	retina	retina	brain, lung	N	2
22997	RTL3	retrotransposon Gag like 3	ZCCHC5 FLJ38865, Mar3, Mart3, ZHC5, SIRH9	Xq21.1	NM_152694	transcription regulator, satellite cells, adult myogenesis	none	mesoderm tissues	non-spec	many, nonspec, incl. IS	heart, lung, bladder	N	0
25214	RTL4	retrotransposon Gag like 4	ZCCHC16 Mart4, Mar4, FLJ46608, SIRH11	Xq23	NM_001004308	involved in cognitive funcions, may be adrenergic (nuclei)	none	NS	ND	unrel.	kidney, liver	N	0
29430	RTL5	retrotransposon Gag like 5	RGAG4 KIAA2001, Mar5, Mart5, SIRH8	Xq13.1	NM_001024455	unknown (increased G1 DNA content	none	incomplete (neural tube)	ND	NS: neurons; GIT	NS, reprod.	N	2
24514	RTL8A	retrotransposon Gag like 8A	FAM127B DKFZP564B147, MAR8A, CXX1b, SIRH6	Xq26.3	NM_001078172	unknown	none	ND	thyroid, heart, brain	ND (RNA: NS, reprod)	ubiquitous	N	0
33156	RTL8B	retrotransposon Gag like 8B	FAM127C MAR8B, CXX1c, SIRH4	Xq26.3	NM_001078173	unknown	none	ND	ND	ND (RNA, ubiquitous: NS, muscle, reprod)	ND	N	0
2569	RTL8C	retrotransposon Gag like 8C	CXX1, FAM127A Mart8, Mar8, MAR8C, SIRH5	Xq26.3	NM_001078171	unknown	none	ubiquitous, brain, skin, muscle, lung	brain, muscle, pituitary	ND (RNA: brain)	ND	N	0
29245	RTL9	retrotransposon Gag like 9	RGAG1 KIAA1318, Mart9, Mar9, SIRH10	Xq23	NM_020769	unknown	none	ND	testis, placenta, appendix, brain	reprod: gametes	testis	N	7
1436	S100G	S100 calcium binding protein G	CALB3 CABP9K, CABP1 "calbindin-D9K	Xp22.2	NM_004057	VitD, Ca++, metal binding	none	GIT	non-spec	GIT, adrenal	GIT: duodenum	N	4
30369	SAGE1	sarcoma antigen 1	SAGE, CT14 "cancer/testis antigen 14	Xq26.3	NM_018666	unknown	retroperitoneal fibrosis, vascular insufficiency of the intestine	lung, testis, carcinoma	PNS + medulla obl, testis, glands	reprod: gametes	testis	N	0
15975	SASH3	SAM and SH3 domain containing 3 Approved	CXorf9 SLY, 753P9, SH3D6C, HACS2	Xq26.1	NM_018990	may be signal adapter in lymphocytes	none	BM, spleen	IS: LN,thymus, all; leucos	IS: all IR++	IS	Y	1
10540	SAT1	spermidine/spermine N1-acetyltransferase 1	SAT SSAT "diamine N-acetyltransferase 1	Xp22.11	NM_002970	acetylation polyamines, substrate spermidine; highly regulated homeostasis intracell [polyamine]	keratosis, skin thickening; eye affected	bone, blood	IS: phagocytes, LN; thyroid, placenta, GIT	LN: mph; many low	BM, appendix, thyroid	N/Y	0
27992	SATL1	spermidine/spermine N1-acetyl transferase like 1	-	Xq21.1	XM_291339	acyltransferase (lipid meatabolism), spermidine binding	none	non-spec	non-spec IS less!	appendix!! IR++ very spec cell	non-spec, brain	N /Y	0
10580	SCML1	cm polycomb group protein like 1	-	Xp22.13	NM_006746	transcription repression during development, may be involved in spermatogenesis	none	ubiquitous, fetal ad reprod	IS: Tc, Th, reprod: gametes, (fetal) liver	gametes, adrenal	testis	N/Y	10
10581	SCML2	cm polycomb group protein like 2	-	Xp22.13	NM_006089	transcription repression during development	none	reprod, HSC	testis, adrenal	GIT, adrenal	reprod	N	7
11583	SERPINA7	serpin family A member 7	TBG "thyroxin-binding globulin", "thyroxine-binding globulin", "alpha-1 antiproteinase, antitrypsin	Xq22.3	NM_000354	Major thyroid hormone transport protein in serum.	hyperthyroidism, goiter,	liver/plasma	liver	liver	liver	N	4
48576	SERTM2	serine rich and transmb domain containing 2	LINC00890	Xq23	NM_001354473	lunknown, long intergenic non-protein coding RNA890	none, susceptibility to mumps	ND	ND	ND (RNA: reprod)	reprod.	N	0	nonprotein	regulator No-dat
10820	SH2D1A	SH2 domain containing 1A	IMD5, LYP XLP, MTCP1, DSHP, XLPD, EBVS, SAP "Duncan's disease	Xq25	NM_002351	adapter signaling lymphocytic activator , incl. NK, also neurotrophin rec	dysgammaglobulinema, hemophagocytic lymphohistiocytosis, sel Ig-def.	thymus, blood, spleen LN	thymus, lymphos: T, B, NK	ND	IS: LN, spleen	Y	1	obvious
10823	SH3BGRL	SH3 domain binding glutamate rich protein like	MGC117402	Xq21.1	NM_003022	SH3 domain binding,glutamic acid protein-like,widely expressed	none	ubiquitous	LN: monocytes, pineal, thyroid, uterus	unrel, many, but IS very strong	endometrium, bladder, IS	Y/N	0
13867	SH3KBP1	SH3 domain containing kinase binding protein 1	CIN85	Xp22.12	NM_031892	adapter signal transduction, endocytosis-lysosomal-, regulation cell stress, Tyr-kinase, MAPK, modulation TNF-induced apoptosis	adrenal & breast adenocarcinoma	blood cells, adrenal, liver:Kupffer	ND	Kupffer, IS: mph!!	LN, spleen, BM	Y	1	very spec for macrophages.
10853	SHOX	short stature homeobox	HOG, GCFX, SS, SHOXY	Xp22.33 + Yp11.32	NM_000451	growth and devlopment via retinoic acid and phorboly-12.myristate	dyschondreostosis, short stature, turner,	fibroblast, bone, muscle, adipocyte, mesenchyme	many	many	adipose (CT)	N	10
630	SHROOM2	shroom family member 2	APX	Xp22.2	NM_001649	cell spreading, melanosome in retinal pigmentation,	none	fetal brain, eye, liver	lung, prostate, lung	many, incle. LN, below capsule, very spec cell Irhi in Germ center	brain, reprod., thyroid	N/Y	10	LN: below capsule, very spec cell Irhi in Germ center
29215	SHROOM4	shroom family member 4	KIAA1202	Xp11.22	NM_020717	cytoskeleton organization, myosin	cerebroatrophic, mental retardation, speech problem, seizures, hyperactivity, short stature,	PBMC, placenta, NS, heart	non-spec	unrel: brain skelMuscle	lung, fat, placenta	N	10
22979	SLC10A3	solute carrier fam 10 member 3	P3, DXS253E	Xq28	NM_019848	conserved, housekeeping	none	many, NS	IS: NK, B; uterus	neurons, liver	many	N	0
10923	SLC16A2	solute carrier fam 16 member 2	DXS128, AHDS, MRX22 XPCT, MCT8, MCT7	Xq13.2	-	specific thyorid hormone transporter	psychomotor defects, dystonia, hypotonia, neurological anomolies	NS, thyroid, liver, endocrines	endocrines, NS, adipose tissue	unrel. NS, endocrine	endocrine, liver	N	3
10984	SLC25A14	solute carrier fam 25 member 14	BMCP1, UCP5	Xq26.1	NM_003951	mt, mb transporter, proton leak (brain)	none	NS, retina, (fetal) gonads	NS: PFC, hypothalamus, pituitario	brain, reprod. System	brain, testis	N	0
30557	SLC25A43	solute carrier fam 25 member 43	-	Xq24	NM_145305	Trans-mb transporter	none	NS, lung, heart	non-spec	unrel, liver	GIT	N	0
10991	SLC25A5	solute carrier fam 25 member 5	ANT2 T2, 2F1, T3	Xq24	NM_001152	exchange cytoplasmit ADP with mito ATP, mitosis anaphaw	male reprod benign neoplasm, mental retardation, cariomyopathy, oncocytoma	many	thymus, IS: leukos	unreliable, many	GIT	N/Y	0
31894	SLC25A53	solute carrier fam 25 member 53	MCART6	Xq22.2	NM_001012755	Trans-mb transporter	none	NS, IS: Tc	BM, testis, heart	unreliable, LN, testis	LN, spleen, brain	N/Y	0
10992	SLC25A6	solute carrier fam 25 member 6	ANT3 ANT3Y, MGC17525	Xp22.32 + Yp11.3	NM_001636	Mitochondrial ADP/ATP-antiporter-apoptosis T cell survival	male reprod benign neoplasm, oftalmoplegia, influenza	many	IS: leukos, thyroid, prostate, lung (thymus)	unreliable, many	many	N/Y	10	higher expressed in leukocytes and some glands, but this preferential expression pattern was not confirmed by other databases. The suggested role in Th survival and immune homeostasis (Jang Cell Immunol 2006, 16930576)
11022	SLC35A2	solute carrier fam 35 member A2	UGALT UGAT, UGT, UGT1, UGT2, UGTL	Xp11.23	NM_005660	nt-sugars from cytosol to Golgi	glycosylation disorder, urogenital TB, hepatitis, Rne-penning syndrom = mental retardation	NS, GIT, blood, manye	IS: DC + NK, thyroid, prostate, placenta	neurons, many, incl. IS	GIT	N	0
18070	SLC38A5	solute carrier fam 38 member 5	SN2, JM24	Xp11.23	NM_033518	Na+-dep amino acid transporter	none	NS, liver, GIT, kidney, blood	pancreas, endothelial, HSC	neurons, GIT, testis	pancreas, BM, thyroid	N	0
11047	SLC6A14	solute carrier family 6 member 14	-	Xq23	-	uptake neutral and cationinc amino acids, Na/Cl-dep	fetal intestinal obstruction, BMI-trait locus	platelet, salivary gland, lung	fetal glands, lung	unrel. Lung, GIT	lung	N	0
11055	SLC6A8	solute carrier family 6 member 8	CRTR, CT1 "creatine transporter"	Xq28	-	creatine uptake muscles, brain	creatine deficiency syndrome, seizures, abnormal behaviour	NS, skel. Muscle	pineal, testis	unrel: brain, GIT	brain, GIT	N	9
11061	SLC7A3	solute carrier family 7 member 3	CAT-3, ATRC3, FLJ14541	Xq13.1	NM_032803	uptake cationic amino acids (R + ornithin) in NA-indep way	adenoma, heart: AV-block	brain, lung, uterus, stomach	thymus, IS: leukos	glands/secretion/exccretion	reprod.	N/Y	8	needs further investigation, seems IS-related
11079	SLC9A6	solute carrier fam 9 member A6	NHE6, KIAA0267	Xq26.3	NM_006359	electic neutral exchange of prons, Na, K , cycling endosomes, Ca+ homeostasis	mental retardation, abnormal behavior + movements	NS: PFC, BM	NS, pituitary, IS: all leuco	brain, testis, IS	brain	N	2
17123	SLC9A7	solute carrier fam 9 member A7	NHE7	Xp11.3	NM_032591	electic neutral exchange of prons, Na, K (homeostasis	myopathy, Baraitser-winter syndrome = mental retardation, hypertelorism	many, LB, retina lung	many, BM	many	brain, LN	N	2
13449	SLITRK2	SLIT and NTRK like fam member 2	SLITL1, TMEM257, CXorf1 KIAA1854, CXorf2	Xq27.3	NM_032539	synaptogenesis, neurite outgrowth	learning disability, dyslexia	NS, bone	NS, +	NS, testis	brain, spleen	N	2
23502	SLITRK4	SLIT and NTRK like fam member 4	DKFZp547M2010	Xq27.3	NM_173078	synaptogenesis, neurite outgrowth	neuroectodermal cancer	NS, endocrine:adrenal, blood: PBMC	non-spec	neurons, endocrine, reprod	brain, endocrine: adrenal	N	2
11097	SMARCA1	SWI/SNF related, matrix associated, actin dep regulator chromatin, subfam a, member 1	SNF2L1, SNF2L SNF2LB, NURF140, ISWI, SWI, hSNF2L	Xq25-q26.1	NM_003069	ATP-dep chromatin perturbation, neurite outgrowth, brain development, luteal cells	mental retardation, thalassemia,(RBC), charge syndrome (heart anomalies), schimke immunoosseous dysplasia	fetal tissues, liver, NS, LT, PBMC, kidney	endocrine, pineal, fetal liver, testis,	neurons, endocrine, reprod	reprod, endocrine	N/Y	10
11111	SMC1A	structural maintenance of chromosomes 1A	MC1L1 DXS423E, KIAA0178, SB1.8, Smcb	Xp11.22	NM_006306	cohesin complex required: sister chromatids/mitosis functiona	Cornela de Lange system=many organs affected, Wiedermann-Steiner = hypertrichosis	LN, blood, Liver, NS	muscle, pineal, myelid HSC	many, NS, endocrine, incl IS		N	0
41913	SMIM10	small integral membrane protein 10	CXorf69	Xq26.3	NM_001163438	unknown	none, increased VACV infection	testis, eye	non-spec	unrel, endocrine, male reprod	ND	N	0
34499	SMIM10L2A	small integral membrane protein 10 like 2A	NCRNA00086, LINC00086 MGC39606, LED, LINC0086 "lncRNA activator of enhancer domains"	Xq26.3	-	unknown	astrocytoma, nasopharyngeal carcinoma	ND	ND	unrel, brain, endocrine, tesits	brain, adrenal	N	0
34500	SMIM10L2B	small integral membrane protein 10 like 2B	NCRNA00087, LINC00087 RP11-85L21.2	Xq26.3	-	unknown	astrocytoma	ND	ND	unrel, brain	brain	N	0
41915	SMIM9	small integral membrane protein 9	CXorf68	Xq28	NM_001162936	unknown	none	testis heart	non-spec	unrel,. Testis	testis, placenta	N	7
11122	SMPX	small muscle protein X-linked	DFN6 DFNX4	Xp22.12	NM_014332	growth, repair skeletal muscle	deafness	heart, skelMuscle, Tonsil	heart, skelMuscle	skel muslce	heart	N	10
11123	SMS	spermine synthase	SRS SPMSY, SpS, MRSR	Xp22.11	NM_004595	decarboxylase, transferase activity, spermine synthase	mental retardation, osteoporosis	many	many, HSC,	unreliable, endocrine, reprod.	reprod.	N	10
14976	SNX12	sorting nexin 12	-	Xq13.1	NM_013346	intracellular trafficking (Lipid-protein binding)	none, increased VACV infection, decreased HPV16 invection	many, NS	fetal liver, BM	unreliable, many	many	N	0	fetal liver + BM = IS?!
32960	SOWAHD	sosondowah ankyrin repeat domain family member D	ANKRD58	Xq24	NM_001105576	unknown	none	bone, blood, spleen, pancreas, testis	non-spec	testis: not-gamete spleen: CT!!	ND	N/Y	0
11199	SOX3	SRY-box 3	PHP	Xq27.1	-	RNApol-II promotor, HPA axis, neuronal development, gonad: male swithc	mental retardation, hypotiroidism, hypertrichosis universalis (= excess hair, ambras type)	brain, pituitary, tesits	non-spec	oviduct, brain, testis	ND	N	0
31353	SPACA5	sperm acrosome associated 5	SLLP2, LYZL5, LYC5, UNQ6288, dJ54B20.3, PNPK6288 "Sperm Lysozyme-Like Protein 2	Xp11.23	NM_205856	lysozyme, hydrolysase chitodextrins (cut NacMurAc-NacGln)	none, increased VACV infection	reprod: ovary,	ND	testis, spermatocytes	testis	N	7
19142	SPACA5B	perm acrosome associated 5B	LYZL5B	Xp11.23	NM_001079900	lysozyme, hydrolysase chitodextrins (cut NacMurAc-NacGln)	none, increased VACV infection	reprod: ovary,	testis	testis, spermatocytes	testis	N	7
11218	SPANXA1	sperm protein nucleus-assoc, X-linked, fam-member A1	PANX NAP-X, SPAN-Xa, SPAN-Xb, CT11.1 "cancer/testis Af fam 11, member 1	Xq27.2	NM_013453	unknown	none, associated increased VACV virus less NFkB	testis, bone, breast	testis, liver, uterus	male reprod.	testis	N	0
14328	SPANXA2	PANX family member A2	SPANX	Xq27.2	-	unknown	none, associated increased VACV virus less IFNb	testis, bone, breast	testis, liver, uterus	male reprod.	testis	N	0
14329	SPANXB1	PANX family member B1	SPANXB2, SPANXF1, SPANXF2 CT11.2 "cancer/testis Ag fam 11, member 2"	Xq27.1	NM_032461	unknown	none, associated increased VACV virus but decreased dengue WNV virus, less NFkB less IL-8	reprod	testis	male Reprod.	testis	N	0
14331	SPANXC	SPANX family member C	CTp11, CT11.3 "cancer/testis Ag fam 11, member 3	Xq27.2	NM_022661	unknown	none, associated decreased susceptibility PPV16, devreased NFkB signaling	BM, testis	testis	male Reprod.	testis	N	0
33174	SPANXD	SPANX family member D	SPANXE CT11.4 "cancer/testis Ag fam 11, member 4	Xq27.2	-	unknown (seems signal transduction; VACV virus infection, less IFN, less NFkB)vi	none, associate VACV-infection	testis, melanoma	ND	male Reprod.	testis	N/Y	0
33174	SPANXN1	SPANX family member N1	SPANX-N1, CT11.6 cancer/testis Ag fam 11, member 6	Xq27.3	NM_001009614	unknown, associated response to simvastatin, PCSK9 protein measuremente		amniocyte, urine	ND	unreliable	ND	N	0
33175	SPANXN2	SPANX family member N2	SPANX-N2, CT11.7 cancer/testis Ag fam 11, member 7	Xq27.3	NM_001009615	unknown	tuberculosis-associated	ND	ND	unreliable	ND	N/Y	0
33176	SPANXN3	SPANX family member N3	SPANX-N3, CT11.8 cancer/testis Ag fam 11, member 8	Xq27.3	NM_001009609	unknown	none	testis	ND	unreliable	testis	N	0
33177	SPANXN4	SPANX family member N4	SPANX-N4, CT11.9 cancer/testis Ag fam 11, member 9	Xq27.3	NM_001009613	unknown	none	ND	ND	unreliable	ND	N	0
33178	SPANXN5	SPANX family member N5	SPANX-N5, CT11.10 "cancer/testis Ag fam 11, member 10"	Xp11.22	NM_001009616	unknown	none	BM-mesenquime	ND	ND	ND	N	0
20694	SPIN2A	spindlin family member 2A	SPIN2 DXF34, TDRD25	Xp11.21	NM_019003	histone 3, lysine methylation activity; cell cycle progression, inhibits apoptosis	none	lung, NS	non-spec	unreliable	many, brain, prostate	N	0
33147	SPIN2B	spindlin family member 2B	SPIN-2, TDRD26	Xp11.21	NM_001006681	histone 3, lysine methylation activity; cell cycle progression, inhibits apoptosis	none	liver, heart	brain, Th endothelium	unreliable	many, brain, prostate	N	0
27272	SPIN3	spindlin family member 3	TDRD27	Xp11.21	XM_093024	histone 3, lysine methylation activity	heart, septal defect	NS, testis	ND	unreliable	brain	N	8
27040	SPIN4	spindlin family member 4	FLJ44984, TDRD28	Xq11.1	NM_001012968	histone 3, lysine methylation activity	heart, septal defect	heart, bladder, NS, blood	non-spec	unreliable	ND	N	8
11271	SPRY3	sprouty RTK signaling antagonist 3	HSPRY3 "antagonist of FGF signaling	Xq28 + Yq12	NM_005840	may be antagonist FGF, modulate respiratory tract organogenesis	Legius syndrome = neurofibromatosis, incl. Immunodefi	widely, fetal, NS	non-spec	unreliable	many	N	10
11402	SRPK3	SRSF protein kinase 3	STK23 MSSK1	Xq28	NM_014370	Serine phosporylation at RS-domains, normal muscle development	none	liver, muscle, NS	heart, skelMuscle	ND, muscle	heart	N	9
11309	SRPX	sushi repeat containing protein X-linked	ETX1	Xp11.4	NM_006307	phagocytosis disc shedding,	retinitis pigmentosa	retina,adipose, bladder , pancreas	adipocyte, SmoothMuscle, uterus	adipocyte, SmoothMuscle, placenta	fat, placenta, bladder	N	0
30668	SRPX2	sushi repeat containing protein X-linked 2	SRPUL	Xq22.1	NM_014467	angiogenesis, cellular migration/adhesion, promotes synapse formation. By urokinase plasminogen activator surface receptor	mental retardation, palsy, epilepsy-speech dyspraxia	adipose, ovary, CT of BM	adipocyte, SmoothMuscle, uterus	unreliable	bladder, placenta, ovary	N	0
11326	SSR4	signal sequence receptor subunit 4	TRAPD "translocon-associated protein delta"	Xq28	NM_006280	CA2+ binding to ER mb, Ca-dep glycosylation of proteins	glycosylation, bone dysplasia	nasal epithelium, bone, pancreas, BM	liver,NK, DC, B, LN, thymus endocrine/pineal, trachea,	many, BM, LN, endocrine, GIT: liver, pancreas	pancreas, stomach	N	0
11335	SSX1	SSX family member 1	CT5.1 "cancer/testis antigen family 5, member 1"	Xp11.23	NM_005635	transcription regulation	sarcoma, cancer testicular	testis, skin, BM	testis	Testis:gametes	testis	N	7
11336	SSX2	SSX family member 2	SSX HOM-MEL-40, HD21, MGC3884, MGC15364, MGC119055, CT5.2a "sarcoma, synovial, X-chromosome-related 2", "synovial sarcoma, X breakpoint 2B", "synovial sarcoma, X breakpoint 2, isoform b", "cancer/testis antigen family 5, member 2a	Xp11.22	NM_003147	transcription regulation	cancer	Reprod: testis	testis, skelMuscle	Testis:gametes	testis	N	7
22263	SSX2B	SSX family member 2B	CT5.2b "cancer/testis antigen family 5, member 2b	Xp11.22	-	transcription regulation	sarcoma, carcinoma	Reprod.	testis, skelMuscle	Testis:gametes	testis	N	7
11337	SSX3	SSX family member 3	CT5.3	Xp11.22	NM_021014	transcription regulation	sarcoma	BM, gametes	non-spec	unreliable, Gametes, liver	ND	N	7
11338	SSX4	SSX family member 4	CT5.4	Xp11.23	-	transcription regulation	sarcoma	testis	non-spec	unreliable, Spermatocytes	testis	N	7
16880	SSX4B	SSX family member 4B	-	Xp11.23	-	transcription regulation	sarcoma	testis	non-spec	unreliable, Spermatocytes	testis	N	7
11339	SSX5	SSX family member 5		Xp11.23	NM_021015	transcription regulation	sarcoma	prostate, testis, skin	liver	unreliable, liver; Spermatocytes	ND	N	7
19653	SSX7	SSX family member 7	-	Xp11.22	NM_173358	transcription regulation	none	testis, melanoma	liver	unreliable, liver; Spermatocytes	ND	N	7
11355	STAG2	stromal antigen 2	SA-2, SCC3B, SA2	Xq25	NM_006603	cohesin complex required: sister chromatids/mitosis functiona	bacterial infections trachea, neuroepitelioa (EwingSarcoma), Cornela de Lange syndrome=manay growth delay, mental retardation, limb defects, etc.	NS, liver (spleen, B)	IS, immunecells, NK, thyroid	many, LN strong	thyroid, BM, LN	N/Y	0
19161	STARD8	StAR related lipid transfer domain containing 8	KIAA0189, ARHGAP38	Xq13.1	NM_014725	Rho GTPase-activating protein (GAP	none, associated craniofacial syndrom (craneosynostosis, clinodactylo, bone/cartilage malformation	BM, monocytes kidney, lung, placenta,	many, but absent in cancer cells	unreliable, many, unspec	kidney, fat	N/Y	0
18174	STK26	serine/threonine kinase 26	MST4, MASK "STE20-like kinase 4	Xq26.2	NM_016542	cell growth - apoptosis decision, Golgi-associated	none	HSC, NS, liver	NK, Tc IS, uterus, placenta, cancer lines	unrel. Muscle	endometrium; BM	N/Y	10
11425	STS	steroid sulfatase	ARSC1 ARSC "arylsulfatase C", "steryl-sulfatase"	Xp22.31	NM_000351	pregnancy; conversion steroids to estrogen	ichthyosis (keratinization disorder) dark brown scale in neck	placenta, respir epithelium, liver, NS	placenta, amygdala	placenta, Leydig, neurons	placenta, adipose	N	7
30773	SUPT20HL1	SUPT20H like 1	FAM48B1 SPT20L "similar to transcription factor (p38 interacting protein)"	Xp22.11	NM_001136234	unknown (possible transcription regulation)	none	ND	ND	ND	ND	N	0
11479	SUV39H1	suppressor of variegation 3-9 homolog 1	SUV39H KMT1A	Xp11.23	NM_003173	histone methyltransferase, to heterochromatin	none	NS. Lung, LN	stemCells, carcinoma (thymus)	unreliable(testicular, IS)	BM, LN	N/Y	0
16273	SYAP1	synapse associated protein 1	FLJ14495, PRO3113 "SAP47 homolog (Drosophila	Xp22.2	NM_032796	adipocyte differenciation; mTOR signaling	none	many	ND	many, nonspec, incl. IS	many, adrenal	N	10
11494	SYN1	synapsin I	-	Xp11.3-p11.23	NM_006950	regulation neurotransmitter release	epilepsy, learning problems, autism/dementia (Rett)	NS, endocrine	NS	NS	brain	N	2
11506	SYP	synaptophysin	MRX96	Xp11.23	NM_003179	short- and long term synaptic plasticity, cholesterol & protein bindin	mental retardation, neuroendocrine cancer	NS, endocrine, GIT	pineal	NS, DT, adipose	brain	N	3
15588	SYTL4	synaptotagmin like 4	"granuphilin-a", "exophilin-2"	Xq22.1	NM_080737	Ca-dep phospholipid binding; granule + hormone secretion,	hipopigmentation immunedef disease (Griscelli syndrome)epileptic encephalopathy, branchiootic syndrome	blood cells, spleen, liver, NS, pituitary, pancreas	non-spec	unreliable, many incl IS	female reprod	N/Y	2
15589	SYTL5	synaptotagmin like 5	"exophilin 9"	Xp11.4	NM_138780	Ca-dep phospholipid binding, vesicle trafficking, Rab-GTPase	none (Anorexia nervosa, erectile dysfunction)	nasal epithelium, placenta, liver	PNS, salivary gland	unreliable	stomach, placenta	N	5
30681	TAB3	TGF-beta activated kinase 1 (MAP3K7) binding protein 3	MAP3K7IP3 "TAK1 binding protein 3	Xp21.2	NM_152787	Map3K/TAK-TRAF2 IL-1 + TNF signal transduction	none	retina, liver, kidney, LN	unspec.	unreliable, many, incl. IS	reprod, BM	Y	1
11535	TAF1	TATA-box binding protein associated factor 1	TAF2A, BA2R, CCG1, CCGS, DYT3 NSCL2, TAFII250, KAT4, DYT3/TAF1	Xq13.1	NM_004606	transcription factor comples, cell cycle, G1 progression	, dystonia	lymphos, NS, liver, GIT	skelMuscle, Tc, Th	many, incl. US, exc. TC	many	N/Y	9
11548	TAF7L	TATA-box binding protein associated factor 7 like	AF2Q CT40 "cancer/testis antigen 40"	Xq22.1	-	transcription factor for spermatogenesis	Deafness-Dystonia-Optic Neuronopathy Syndrome	testis, eye, lung	maleGermCell	testis, neurons	testis	N	7
17306	TAF9B	TATA-box binding protein associated factor 9b	TAF9L TAFII31L, DN-7, DN7, TFIID-31	Xq21.1	NM_015975	transcription regulation; apoptosis-survival decision	none	blood, fem.reprod, NS	PNS, skel.Muscle, adrenal	many, incl. IS	brain, reprod., thyroid	N	10
11577	TAZ	tafazzin	CMD3A, EFE2, EFE BTHS, XAP-2, G4.5, TAZ1 "Barth syndrome", "transcriptional coactivator with PDZ-binding motif	Xq28	-	acyltransferase (lipid metabolism) for mitochondria; cardiolipin and other lipids remodeling enzyme; heart dev; dengue viral host factor; association rheumatoid arthritis, DM-1, celiac disease	cardiomyopathy, familial	brain, muscle, heart	Tc, Th, B (Dengue viral host factor; Sessions)	Muscle: sm; cardiac muscle: Z-discs	brain, spleen, LN	Y/N	0	GWAS associations seem rather due to Xq28-TMEM187 wwe.ebi.ac.uk GWAS catalog
24715	TBC1D8B	TBC1 domain family member 8B	FLJ20298, RP11-321G1.1, GRAMD8B	Xq22.3	NM_017752	GTPase-activating protein for Rab	none	NS, adrenal	many, non-spec.	adrenal, liver	adrenal	N	0
8092	TBC1D25	TBC1 domain family member 25	OATL1	Xp11.23	NM_002536	autofagosome regulation	synovial & renal cancer, aland island eye disease	Tc, NK, B, reprod., NS, pancreas, lung	ND	unreliable, NS, endocrine, GIT	brain, male reprod	N/Y	0
11585	TBL1X	transducin beta like 1 X-linked	TBL1 EB	Xp22.31-p22.2	NM_005647	transcription regulator of Nuclear receptor (Steroid hormones); downregulation via protease	ocular albinism, late-onset sensorineural deafness	heart, monocytes, Tc, pancreas, lung, NS	monocytes, (B), uterus, pineal	unreliable, many		N/Y	0
11600	TBX22	T-box 22	CPX, CLPA	Xq21.1	NM_016954	transcriptional regulator embryogenesis, palatogenesis	cleft palate, ankyloglossia (tongueI	testis, thyroid, skin	PNS, skel.Muscle, testisGermCells	ND	testis, thyroid, broad	N	0
11616	TCEAL1	transcription elongation factor A like 1	p21, pp21, SIIR, P21, WEX9	Xq22.2	NM_004780	transcription regulation	none	many: reprod, cancers, spleenn	reprod, amygd, cerebellumPeduncle	reprod, smoothMuscle	reprod.Sy	N/Y	0
29818	TCEAL2	transcription elongation factor A like 2	my048, MY0876G05, WEX1	Xq22.1	NM_080390	transcription regulation (transcription elongation factor	none	NS, reprod. System	brain, thyroid, testis	brain, reprod. System, thyroid, adrenal	brain, reprod., thyroid	N	0
28247	TCEAL3	transcription elongation factor A like 3	MGC15737, WEX8	Xq22.2	NM_032926	transcription regulation (transcription elongation factor	none	many, eye, skin, stomach, NS	ND	unreliable (brain, not IS)	NS, reprod.systems, endocrine	N	0
26121	TCEAL4	transcription elongation factor A like 4	FLJ21174, WEX7	Xq22.2	NM_024863	transcription regulation (transcription elongation factor	acrocollosal syndrome (agenesis corpus callosum, facial abnormalities)	NS, liver, muscle, hearts, spleen (B)	reprod, thyroid, brain 1stV	ND	reprod., endocrine	N	0
22282	TCEAL5	transcription elongation factor A like 5	WEX4	Xq22.1	XM_291334	transcription regulation (transcription elongation factor	none	brain, GIT, reprod. Endocr.	pituitary, NS, thyroid	brain, testis (spermatids), spleen: endothleium	brain, testis	N	0
24553	TCEAL6	transcription elongation factor A like 6	WEX2	Xq22.1	NM_001006938	transcription regulation (transcription elongation factor	none	brain, adrenal, heart	PNS: Avnode, testis	brain, testis (spermatids), spleen: endothleium	brain, testis, adrenal	N	0
28336	TCEAL7	transcription elongation factor A like 7	MGC23947, WEX5	Xq22.2	NM_152278	neg.regulation NFkB signaling, cell cycle control, telomerase act.	none	NS, fetal brain + heart	pituitary, NS	NS, endocrine, female reprod.	brain, adrenal, fem. reprod.	N	0
28683	TCEAL8	transcription elongation factor A like 8	MGC45400, WEX3	Xq22.1	NM_153333	transcription regulation (transcription elongation factor	none	NK, fetal GIT, NS, liver	ND	unreliable	many, endocr	N/Y	0
30084	TCEAL9	transcription elongation factor A like 9	WBP5 DKFZp313K1940, WEX6 "pp21 homolog"	Xq22.2	NM_016303	transcription regulation (transcription elongation factor	none	many, muscle, endocrine, brain, not IS	many, muscle, endocrine, brain, not IS	unreliable, NS, not IS	endocrine, female reprod	N	0
28277	TCEANC	transcription elongation factor A N-terminal and central domain containing	MGC17403	Xp22.2	NM_152634	unknown	none	intestine, skin	ND	unreliable	many, BM, spleen, LN, ovary	N/Y	0
48369	TCP11X1	t-complex 11 family, X-linked 1	-	Xq22.1	-	unknown	none	(testis)	ND	-	(testis, lung, stomach)	N	0
48335	TCP11X2	t-complex 11 family, X-linked 2	-	Xq22.1	-	unknown	none	ND	ND	male Reprod.	(testis, lung, stomach)	N	0
8117	TENM1	teneurin transmembrane protein 1	ODZ3, TNM, ODZ1 TEN-M1	Xq25	NM_014253	neural development, proper connectivity, signal transduction	lymphoproliferative syndrome 1,anosmia, lacrimal gland carcinoma,	fetal, brain	fetal brain, cerebellum	unreliable	brain, prostate, thyroid, BM	N/Y	2
28399	TENT5D	terminal nucleotidyltransferase 5D	FAM46D MGC26999, CT1.26, CT112 "cancer/testis antigen 112"	Xq21.1	NM_152630	non-canonical RNA-pol (nucleotidyltransferase)	none	testis, eye	testis	unreliable	testis	N	0
11733	TEX11	testis expressed 11	TSGA3, TGC1	Xp11		crossing over regulation during meiosis	male infertility, spermatogenic failure	testis, liver bone	skeletMuscle, testis, pituitary, cerebellumPeduncles	unrel. Testis	testis, pancreas	N	7
11735	TEX13A	testis expressed 13A	-	Xq22.3	NM_031274	unknown (Zn-finger domain)	none	testis, NS	testis	testis	testis	N	7
11736	TEX13B	testis expressed 13B	TSGA5, TGC3B	Xq22.3		unknown, Zn-finger domain	decreases NFkB e IL-8 expr	testis	many, liver, skel.muscle	unreliable, many	testis	N/Y	0
52277	TEX13C	TEX13 family member C		Xq25		unknown	none	ND	ND	ND	testis	N	7
52278	TEX13D	TEX13 family member D		Xq25		Unknown	none	ND	ND	ND	ND	N	7
2563	TEX28	testis expressed 28	CXorf2	Xq28	NM_001586	unknown	color blindness	testis, amniocyte	testis, liver, CNS: parietal lobe	ND	testis, skin	N	7
24603	TFDP3	transcription factor Dp family member 3	HCA661, E2F-like, CT30 "E2F-like protein", "cancer/testis antigen 30"	Xq26.2	NM_016521	cell-cycle inhibition G1-S, via E2F competition	none	testis	PNS, pituitary, others	ND	ND	N	10
11752	TFE3	transcription factor binding to IGHM enhancer 3	TFEA, bHLHe33 transcription factor E family, member A	Xp11.23	NM_006521	transcription factor, induces CD40L expr in LT for Ab-response	cancer various	NS, BM, liver	many, moncytes, myeloid. brain, placenta, thyroid,	many, brain, GIT, BM	many, fat	Y	1
18570	TGIF2LX	TGFB induced factor homeobox 2 like X-linked		Xq21.31	NM_138960	maybe transcription role in testis	none	testis, adrenal gland	ND	male Reprod.	ND	N	7
19073	THOC2	THO complex 2	CXorf3, MRX12, MRX35 THO2, dJ506G2.1	Xq25		spliced mRNA transport from nucleus to cytoplasm, proper neuronal development	mental retardation, seizure, delayed speech, short stature	many, liver; CNS: hippocampus	IS: NK, DC, myeloid, HSC	many, incl. IS, brain,	many, esp. IS	N/Y	0
11817	TIMM8A	translocase of inner mitochondrial membrane 8A	DFN1 DDP, MTS	Xq22.1	NM_004085	insertion hydrophobic protein in mitochondrial mb	agammaglobulinemia, deafness, dystonia, cortical blindness, , (MTS/DDS syndrome)	many, liver, CNS, kidney	many, lymphoblasts	many; heart, liver, incl. Lymphatic; kidney: TCD	many	N	0
17310	TIMM17B	translocase of inner mitochondrial membrane 17B	DXS9822, JM3	Xp11.23	NM_005834	transport proteins over inner mitochondrial mb	renpenning syndrome: intellectual disabled, microcephaly, long face, short stature, small testis; mainly male	many, incl lymphatic tissues	heart, monocytes/lymphocytes	many, incl lymphatic tissues	many	N(y)	0
11820	TIMP1	TIMP metallopeptidase inhibitor 1	TIMP, CLGI EPO	Xp11.3	NM_003254	regulation MMPs and ADAMs, role in wound healing, cell proliferation &differentiation	oral submucous fibrosis, chronic venous ulcer, gingival overgrowth, conjuntivochalasis	many	muscle, fat, pineal, reprod.tissue	many, muscle, fat, reprod.tissue	many	N	0
11835	TKTL1	transketolase like 1	TKR, TKT2	Xq28	NM_012253	anaerobic glc metabolism under hypoxic circumstances; converts hepta-sugar and glyceraldehyde in ribose and xylulose; like pentose to glycolysis	none	ovary, testis (early sperm precursors), placenta, whole blood, bone	testis, NK	testis	testis (heart/lung)	N/Y	7
15631	TLR7	toll like receptor 7	-	Xp22.2	NM_016562	PAMP recognition, intracellular, activation NFkB, innate IS	viral infectious dis, basal cell carcinoma	lymphatic tissue	innate IS: DC!!	lymphatic tissue, spleen: red pulp	appendix, IS, placenta	Y	1
15632	TLR8	toll like receptor 8	CD288	Xp22.2	NM_016610	PAMP recognition, intracellular, activation NFkB, innate IS	viral infectious dis, hemorrhagic fever, basal cell carcinoma	lymphatic tissue	innate IS	lymphatic tissue, spleen: red pulp	appendix, spleen	Y	1
28601	TMEM31	transmembrane protein 31	-	Xq22.2	NM_182541	unknown	none	testis	-	testis	testis restricted	N	7
25864	TMEM35A	transmembrane protein 35A	TMEM35 FLJ14084	Xq22.1	NM_021637	shed: may modulate neurite outgrowth	none	CNS	-	brain, hippocampus neurons strong!	brain, prostate	N	2
18515	TMEM47	transmembrane protein 47	TM4SF10 BCMP1, DKFZP761J17121, DKFZp564E153, VAB-9	Xp21.1	NM_031442	claudin fam, ER, plasma mb, cell junction organization/ actin polimerization	none	CNS, heart	brain, adipocytes, uterus	ubiquitous, not lymphatic	ubiquitous	N	0
26217	TMEM164	transmembrane protein 164	FLJ22679, RP13-360B22.2	Xq23	NM_032227	unknown	none	eye	-	ubiquitous, not lymphatic!!	ubiquitous, lung, fat	N	0
17125	TMEM185A	transmembrane protein 185A	CXorf13, FAM11A FRAXF	Xq28	NM_032508	G-protein coupled rec, neuronally expressed,	fraxf syndrome: mental retardation, developmental delay, CpG island of folate-sensitive fragile sites	CNS, eye	-	unreliable	reprod. Tract: ovary, placenta, testis	N	0
13705	TMEM187	transmembrane protein 187	CXorf12 ITBA1, DXS9878E	Xq28	NM_003492	unknown (lipid association?); association rheumatoid arthritis, celiac disease, DM-1	none	ubiquitous	-	unreliable	ubiquitous, prostate, adipose tissue	N/Y	0
26086	TMEM255A	transmembrane protein 255A	FAM70A FLJ20716	Xq24	NM_017938	unknown, prediction: nuclear envelope protein	none	brain: hypothalamus, subst. Nigra, inhibitory (amacrine) neurons (GABA, Glycine); embryonic development (pharyngeal region)	no data	unreliable, brain	broad, ovary,	N	0
18308	TMLHE	trimethyllysine hydroxylase, epsilon	MLH, FLJ10727, BBOX2, XAP130	Xq28	NM_018196	mitochondrial matrix, 1st step carnitine biosynthesis, genomic instability (function carnitin: transport of fatty acid across mitochondrial inner mb)	autism spectrum	broad, pancreas, CNS	no data	broad, lymphatic esp.	ubiquitous	N	0
11881	TMSB4X	thymosin beta 4 X-linked	TMSB4 TB4X	Xp22.2	NM_021109	cytoskeleton organization: actin sequestrin, identical IFN-inducible gene 6-26, prolif, migration, differentiation		ubiquitous, CNS	lymphatic, monocyt, myeloid, lymphoblast	ubiquitous, BM, Kupffer	spleen, lymphnode	Y	1
30744	TMSB15A	thymosin beta 15a	TMSL8 TMSNB	Xq22.1	NM_021992	cytoskeleton organization: actin; inhibits actin polymerization	neuroblastoma	ubiquitous, CNS, blood,	no data	unreliable	reprod. Tract, ubiquitous		0
28612	TMSB15B	thymosin beta 15B	MGC39900	Xq22.2	NM_194324	cytoskeleton organization: actin; cell migration; biological response modifier	none	blood, CNS	no data	unreliable, female reprod	reprod. Tract, ubiquitous	N/Y	0
17757	TNMD	tenomodulin	myodulin, ChM1L, tendin, TEM, BRICD4	Xq22.1	NM_022144	tendon biomarker, tendon endurance and adaptation to mechanical load	epileptic encephalopathy	adipose tissue	tendons/ligaments	unreliable	tendon, fat tissue	N	9
23068	TRAPPC2	trafficking protein particle complex 2	SEDL TRS20, SEDT, MIP-2A, ZNF547L, hYP38334	Xp22.2	NM_014563	ER-Golgi vesicle transport, prevents transcription suppresion and cell death	disorder of endochondral bone formation, skeletal dysplasias, encephalopathy, leber hereditary optic neuropathy	ubiquitous	lymphatic cells: LB, NK; pineal; testis; adrenal; TRAPP = trafficking protein particle; ER-GA intermediate	ubiquitous, spleen/red pulp/macrophages, neurons	IS, brain	N/Y	0
12270	TREX2	three prime repair exonuclease 2	-	Xq28	NM_080701	3´repair exonuclease (perhaps DNApol-subunit)	none	ubiquitous	-	ubiquitous, skin, germ centers	skin, ubiquitous	N/Y	0
25748	TRMT2B	tRNA methyltransferase 2 homolog B	CXorf34 FLJ12687	Xq22.1	NM_024917	methyltransferase, tRNA funcionality	none	ubiquitous	-	ubiquitous, unreliable	ubiquitous, lymphnode, spleen	N	0
12326	TRO	trophinin	MAGE-D3, KIAA1114, MAGED3	Xp11.21	NM_016157	adhesion, trophoblast-endometrium	none	CNS	brain	brain, female reprod	brain, endometrium	N	0
12337	TRPC5	transient receptor potential cation channel subfamily C member 5	PPP1R159, "protein phosphatase 1, regulatory subunit 159"	Xq23	NM_012471	calcium channel	(hypertrophic) piloric stenosis, hypertension, mental retardation	brain, gonads, fetal heart	CNS, heart, uterus	no data . Brain	brain	N	2
3051	TSC22D3	TSC22 domain family member 3	DSIPI DIP, GILZ, TSC-22R, hDIP, glucocorticoid-induced leucine zipper	Xq22.3	NM_198057	Immune system functions, protects against IL-2 deprivation induced apoptosis	none	many	lymphatic	many, incl lymphatic tissues	appendix, adipose tissue	Y	1
11858	TSPAN6	tetraspanin 6	TM4SF6 T245, TSPAN-6	Xq22.1	-	receptor/signal transduction	epileptic encephalopathy, trichomoniasis	many, but not lymphatic	epithelial, neuronas	epithelial, neuronas	epithelial, neuronas	N/Y	0
11854	TSPAN7	tetraspanin 7	MXS1, TM4SF2, MRX58, DXS1692E, TALLA-1, A15, CD231	Xp11.4	-	unknown, may be involved in proliferation and cell motility	mental retardation, periodontitis, miliaria, fragile X syndrome	ubiquitous , CNS	CNS, GIT	pancreas, CNS, GIT	brain	N	0
24358	TSPYL2	TSPY like 2	SE20-4, HRIHFB2216, CTCL, DENTT, CDA1, CINAP, TSPX	Xp11.22	NM_022117	inhibitory role tumorigenesis, inhibition proliferation	gonadoblastoma,	gonads, fetal brain,	many, incl. Lymphatic	many, brain	gonads	N	10
25455	TSR2	TSR2, ribosome maturation factor	DT1P1A10, RP1-112K5.2, WGG1, WGG motif containing 1	Xp11.22	NM_058163	20S-preRNA processing	diamond-blackfan anemia (erythoroid aplasia),, pancytopenia, mandibulofacial dysostosis and dystonia, urogenital anomalies	ubiquitous	-	ubiquitous	ubiquitous	N	0
18578	TXLNG	taxilin gamma	CXorf15 FLJ11209, LSR5, FIAT, MGC126621, MGC126625, TXLNGX	Xp22.2	NM_018360	may be, vesicle trafficking, LPS-upregulated gene expr. , factor inhibiting activating transcription factor 4 (ATF4)-mediated transcription = transcription factor	none	ubiquitous, incl. Lymphatic	-	ubiquitous, incl. Lymphatic	ubiquitous, incl. Lymphatic	N	0
12469	UBA1	ubiquitin like modifier activating enzyme 1	A1S9T, GXP1, UBE1, UBE1X, POC20, CFAP124	Xp11.3	NM_003334	Ubiquitin conjugation, marks proteins for degradation	spinal muscular atrophy (anterior horn)	ubiquitous	no data	ubiquitous,	ubiquitous	N	0
12472	UBE2A	ubiquitin conjugating enzyme E2 A	UBC2, HHR6A, RAD6A	Xq24	NM_003336	post replication repari	mental retardation, syndrome type, no immune system deficiencies	brain, heart, skin	placenta, lymphatic	no data	many, placenta	N/Y	0
31710	UBE2NL	ubiquitin conjugating enzyme E2 N like (pseudo)gene	-	Xq27.3	NM_001012989	pseudogene	none	brain, heart, skin	no data	no data		N	0
12505	UBL4A	ubiquitin like 4A	UBL4 GDX, DXS254E, GET5, MDY2, TMA24	Xq28	NM_014235	protein quality control; sorting to ER or proteasome	optic nerve disease, juvenile glaucoma	ubiquitous	ubiquitous, CNS, not lymphatic	ubiquitous, not lymphatic	ubiquitous	N	0
12509	UBQLN2	ubiquilin 2	Chap1, Dsk2, RIHFB2157, LIC-2, CHAP1/DSK2, PLIC-2, N4BP4, PLIC2	Xp11.21	NM_013444	ubiquitin-like, protein degradation, autophagy regulation, NEDD4 binding protein 4	amyotrophic lateral sclerosis (ALS)	ubiquitous, CNS	lymphatic, lymphocytes! CNS	ubiquitous, CNS, Lymphatic, many	no data	Y/N	0
20439	UPF3B	UPF3B, regulator of nonsense mediated mRNA decay	MRX62, UPF3BP1, UPF3BP2, UPF3BP3, RENT3B, UPF3X, HUPF3B	Xq24	NM_080632	mRNA export from nucleus to cytosol, mRNA surveillance, decay non-sense mRNA (premature stop codons), axon outgrowth	mental retardation, autism, schizophrenia, fryns syndrome	many	lymphatic tissue	many	many	Y/N	0
28334	UPRT	uracil phosphoribosyltransferase homolog	DKFZp781E1243, MGC23937, FUR1, RP11-311P8.3	Xq13.3	NM_145052	conversion uracil to UMP, nt metabolism	none	many, CNS	-	muscle, GIT, unreliable	ubiquitous	N	0
12632	USP9X	ubiquitin specific peptidase 9 X-linked	DFFRX, FAF, MRX99	Xp11.4	NM_004652	deubiquitinates on lysines (K) + SMAD, regulation axon growth + neuronal migration	mental retardation, breast cancer	ubiquitous, CNS	lymphatic tissue, place, fetal erythroid, male reprod.	ubiquitous	testis, thyroid, broad	N	0
12609	USP11	ubiquitin specific peptidase 11	UHX1	Xp11.3	NM_004651	deubiquitinates on lysines (K); regulating DNA repair, regulation NFkB activation	none	many	no data	many, CNS	CNS	N	2
13485	USP26	ubiquitin specific peptidase 26	-	Xq26.2	NM_031907	thiol-dep hydrolysis of ester/peptide bonds, deubiquitinase in androgen signalling	male infertility, spermatogenic failure	serum, placenta	no data	testis	testis	N	7
13486	USP27X	ubiquitin specific peptidase 27 X-linked	USP27	Xp11.23	XM_372213	deubiquitinase with indirect pro-apoptopic effects, tumor suppressor	mental retardation	no data	-	unreliable	no data	N	0
23086	USP51	ubiquitin specific peptidase 51	-	Xp11.21	NM_201286	deubiquitinates K-14 and K-16 of histone H2A regulating DNA damage response	none	no data	no data	ubiquitous, unreliable	ubiquitous	N	0
10665	UTP14A	UTP14A, small subunit processome component	SDCCAG16 NY-CO-16, Utp14	Xq26.1	NM_006649	ribosome biogenesis	none	many	many	lymphatic, reprod. Tissues		N	0
12641	UXT	ubiquitously expressed prefoldin like chaperone	ART-27, STAP1 "androgen receptor trapped clone 27", "SKP2-associated alpha PFD 1	Xp11.23	NM_153477	transcriptional corepressor (Androgen-Estrogen), protection against TNFa induced apoptosis; prevents FADD recruitment	none	many, blood	lymphatic tissue	many, incl lymphatic tissues		Y/N	0
11486	VAMP7	vesicle associated membrane protein 7	SYBL1 VAMP-7, TI-VAMP	Xq28 and Yq12	NM_005638	granulocyte degranulation, NK-killing, phagosome formation, transport of proteins between vesicles/lysosomes, mb-str	tetanus, immuneDef, facial abnormality	many cell types	innate-lymphatic tissue	many		Y	1
12662	VBP1	VHL binding protein 1	PFD3, PFDN3 "prefoldin 3	Xq28	-	intermediate chaperone-target protein: protein folding	none	many cell types	no data	many		N	0
12667	VCX	variable charge X-linked 3B	VCX1, VCX10R, VCX-10r, VCX-B1	Xp22.31	NM_013452	may be involved in gametogenesis	none	testis	testis	testis, sperm precursor		N	7
18158	VCX2	variable charge X-linked 2	VCX-2r, VCX-2R	Xp22.31	NM_016378	may be involved in gametogenesis	mental retardation		-	testis, sperm precursor	-	N	7
18159	VCX3A	variable charge X-linked 3A	VCX3 VCX-8r, VCX-8R, VCX-A	Xp22.31	NM_016379	may be involved in gametogenesis (similar to steroid sulfatase deficiency)	Kallmann syndrome/hypogonadism, hyperkeratosis, general dryness	testis		testis, sperm precursor	-	N	7
31838	VCX3B	variable charge X-linked 3B	VCX-C	Xp22.31	-	may be involved in gametogenesis	none	testis	-	testis, sperm precursor	-	N	7
3708	VEGFD	vascular endothelial growth factor D	FIGF VEGF-D c-fos induced growth factor	Xp22.2	NM_004469	(lymph)angiogenesis, maintenance differentiated lymphatic endothelium	cancer (breast, anal squamous, lymphangioleiomyomatosis, congenital lymphedema	lung, heart, lymphNode, CNS	lung, adipocyte	many, CNS		Y/N	0
20985	VGLL1	vestigial like family member 1	TONDU, TDU	Xq26.3	NM_016267	Transcriptional coactivator	noonan syndrome, (Turner-like), increased risk juvenile myelomonocytic leukemia	placenta	-	placenta	-	N	7
22082	VMA21	VMA21, vacuolar ATPase assembly factor	MEAX XMEA	Xq28	NM_001017980	vacuolar ATPase assembly factor	myopathy, excessive autophagy-high lysosomal pH, Danon disease-glycogen storage disease	Nervous system, nasal epithelium, many		Leydig++		N	2
28675	VSIG1	V-set and immunoglobulin domain containing 1	-	Xq22.3	NM_182607	adhesion & differentiation signal	none	gonads, stomach	-	gametogonia, stomach		N	7
17032	VSIG4	V-set and immunoglobulin domain containing 4	Z39IG, CRIg	Xq12	NM_007268	C3b + iC3b complement receptor, (may be negative regulator LT)	langerhans cell sarcoma, histiocyte rich lymphoma, keratoconjunctivitis sicca/dry eye syndrome	fetal tissues, CNS/CSF, lymphatic tissue	mph, adipose, adrenal cortex	mph /DC(placenta, liver)		Y	1
12731	WAS	Wiskott-Aldrich syndrome	IMD2, THC WASP, WASPA	Xp11.23	NM_000377	actin filament reorganization (pseudopodia formation)	eczema-thrombocytopenia, immune deficiency	lymphatic tissue, BM	lymphatic tissue	lymphatic tissue	lymphatic tissue	Y	1
14352	WDR13	WD repeat domain 13	-	Xp11.23	-	unknown	inclusion conjuntivitis	many cell types	many	many	many	N	0
30512	WDR44	WD repeat domain 44	DKFZp686L20145, RPH11, RAB11BP, SYM-4	Xq24	NM_019045	may be: vesicle recycling; GA-endosome associated	none	many cell types	immune cells	many	immune cells	N/Y	0
28912	WDR45	WD repeat domain 45	WDRX1 JM5, WIPI4, NBIA5	Xp11.23	NM_007075	autophagy pathway to lysosome; phosphoinositide interacting	neurodegeneration with brain iron accumulation 5, visual epilepsy	muscle, heart, liver, bone, ovary	pre-ery; IS: NK, DC; heart, liver; pineal;	unreliable, epidydimis	thyroid, bladder, adrenal	N/Y	0
14543	WNK3	WNK lysine deficient protein kinase 3	PRKWNK3	Xp11.22	NM_020922	serine/threonine (without lysine) kinase	mental retardation, cancer	CNS, liver, lung, fetal tissues	no data	no data	no data	N	0
29237	WWC3	WWC family member 3	KIAA1280, BM042	Xp22.2	NM_015691	cytosol, unknown	none	CNS, liver	-	epithelia, muscle, many organs	-	N	0
4111	XAGE1A	X antigen family member 1A	GAGED2, XAGE1 XAGE-1, CT12.1a	Xp11.22	NM_001097591	cancer/testis antigen family 12, member 1a	Ewing sarcoma (neuroepithelium), rhabdomyosarcoma, cancers	fetal, reprod. Tissue (testis) & cancers, many (Neurons, epithelial cells, special cells in lymph node)		no data/testis		N	0
25400	XAGE1B	X antigen family member 1B	CT12.1b	Xp11.22	-	cancer/testis antigen family 12, member 1b	Ewing sarcoma (neuroepithelium), rhabdomyosarcoma, cancers	fetal, reprod. Tissue (testis) & cancers, many (Neurons, epithelial cells, special cells in lymph node)		No data		N	0
30679	XAGE1C	X antigen family member 1C	CT12.1c	Xp11.22	-	cancer/testis antigen family 12, member 1c	none	normal, BM stem cells, muscle, mainly testis, various cancers		No data		N	0
21508	XAGE1D	X antigen family member 1D	CT12.1d (GAGED2)	Xp11.22	-	cancer/testis antigen family 12, member 1d; no data	Ewing sarcoma (neuroepithelium) cancers	normal, BM stem cells, muscle, mainly testis, various cancers		No data		N	0
18372	XAGE1E	X antigen family member 1E	- (GAGED2)	Xp11.22	-	cancer/testis antigen family 12, member 1e; no data	none	normal, BM stem cells, muscle, mainly testis, various cancers		No data		N	0
4112	XAGE2	X antigen family member 2	GAGED3, XAGE2B XAGE-2, CT12.2	Xp11.22	NM_130777	cancer/testis Ag fam 12 member 2	Ewing sarcoma (neuroepithelium)			placenta, fetal, reprod. Tissue & cancers, many (Neurons, epithelial cells, special cells in lymph node)		N	0
14618	XAGE3	X antigen family member 3	PLAC6, GAGED4 XAGE-3, pp9012, CT12.3a, CT12.3b	Xp11.22	NM_133179	cancer/testis Ag fam 12 member 3a and 3b	none			placenta, fetal, reprod. Tissue & cancers, many (Neurons, epithelial cells, special cells in lymph node)			0
30930	XAGE5	X antigen family member 5	GAGED5 XAGE-5, CT12.5	Xp11.22	NM_130775	cancer/testis Ag family 12, member 5	none	brain, testis		neurons, Sertoli	-	N	0
12806	XG	Xg glycoprotein (Xg blood group)	PBDX	Xp22.33	NM_175569	Xg blood group	color blindness, hypogonadism, Kallmann syndrome	BM, skin, heart	erythrocytes	unreliable		N	0
592	XIAP	X-linked inhibitor of apoptosis	PI3, BIRC4 hILP	Xq25	NM_001167	Apoptosis suppressor	lymphoproliferative syndrome, dysgammaglobulinemia	PBMC, L, NK, Mo	appendix	many, glands, neurons, immune cells		N/Y	0	apoptosis- cancer not mainly IS	apoptosis- cancer not mainly IS
12811	XK	X-linked Kx blood group	NA, NAC XKR1, Kx, X1k "Kx antigen	Xp21.1	NM_021083	Kell blood group Ag, may be aa or peptide transporter or lipid deficiency	McLeod syndrome = absence blood K Ag with severe neurologic disorders , muscular weakness, also affects heart, chronic granulomatous disease,		erythrocytes	cerebellum, muscle, testis, endometrium, skin		N	0
29845	XKRX	XK related X-linked	XPLAC, XKR2	Xq22.1	NM_212559	Kell blood group related	none	none		none	many, skin, lymphatic	N	0
12823	XPNPEP2	X-prolyl aminopeptidase 2	-	Xq26.1	NM_003399	mb-bound metallo-aminopeptidase, eliminates penultimate Pro	angioedema, atrophic (dry) rhinitis,	kidney, GIT	kidney, fetal liver, adipocytes			N	6
28304	YIPF6	Yip1 domain family member 6	MGC21416, FinGER6	Xq12-q13.1	NM_173834	maybe involved in vesicle-mediated transport	none Null-mice: ull-mice: intestinal inflammation (defects secretion Goblet/Paneth cells)	nasal epithelium, rectum, liver, pancreas, bladder, testis, ovary, placenta, PBMC, platelet,	erythrocyte progenitors	unreliable		N	0
31684	YY2	YY2 transcription factor	ZNF63	Xp22.12	NM_206923	TF, activation or repression	none	LB, Tc, NK, placenta, ovary, testis	muscle, liver, pineal: NK, myeloid	testis	ND	N/Y	10
447	ZBED1	zinc finger BED-type containing 1	ALTE TRAMP, KIAA0785, DREF, hDREF	Xp22.33 and Yp11	NM_004729	master regulator proliferation, cell cycle, promotor histone H1	laryngostenosis	monocyte, LB, Tc, spleen colon, adrenal, placenta	liver, IS: DC, LB, NK; adrenal	unreliable	placenta, spleen, testis	N	10
16682	ZBTB33	zinc finger and BTB domain containing 33	ZNF-kaiso, kaiso, WUGSC:H_DJ525N14.1, KAISO, ZNF348	Xq24	NM_006777	binds to methylated CpGdint + kaiso site, repression Wnt signaling	thymoma	lymphocytes	skin, BM, many	unreliable		Y	1
17407	ZC3H12B	zinc finger CCCH-type containing 12B	CXorf32 MCPIP2 "MCP induced protein 2"	Xq11.2-q12	XM_293334	regulation pro-inflammatory activation of Mph pmid18178554	none	BM, plasma,	non-spec	unrel (RNA: NS, DT)	skin, BM, many	N/Y	2
24931	ZC4H2	zinc finger C4H2-type containing	KIAA1166, WWS HCA127	Xq11.2	NM_018684	mb-bound, interneuron differentiation, neuromuscular junctions formation	mental retardation, in utero CNS, PNS, muscle atrophy	rectum, heart, platelet, plasma		pancreatic islets, lymphatic tissue,	brain, endometrium, ovary, thyroid	Y/N	10
27273	ZCCHC12	zinc finger CCHC-type containing 12	FLJ16123, SIZN, SIZN1, PNMA7A	Xq24	NM_173798	transcriptional coactivator	cognitive disabilityy			adrenal cortex, endometrium, Leydig	endometrium, adrenal, brain, ovary	N	0
31749	ZCCHC13	zinc finger CCHC-type containing 13	4930513O09RIK, Cnbp2, ZNF9L	Xq13.2	NM_203303	TF, unknown	unknown	unknown		spermatidII	unknonw	-	0
32459	ZCCHC18	zinc finger CCHC-type containing 18	IZN2, PNMA7B	Xq22.2	NM_001143978	bind DNA or RNA, unknown	unknown	unknown	mainly found in viral nucleocapsids	unreliable	brain, ovary, LT, ubiquitous	N	0
18475	ZDHHC9	zinc finger DHHC-type containing 9	ZDHHC10, CXorf11 ZNF379, CGI-89, ZNF380	Xq26.1	NM_016032	integral mb protein, palmitoyltransferase	mental retardation, epilepsy	frontal cortex		unreliable	immune cells, brain, testis,	N	0
20342	ZDHHC15	zinc finger DHHC-type containing 15	FLJ31812, MRX91, DHHC15	Xq13.3	NM_144969	palmitoyltransferase	mental retardation			unreliable, islets Langerhans, LN	-	N	0
12865	ZFP92	ZFP92 zinc finger protein	ZNF897	Xq28		unknown	unknown	platelet		unreliable	ovary, bone marrow	N	0
12869	ZFX	zinc finger protein X-linked	ZNF926	Xp22.11	NM_003410	TF, selfrenewal, gametogenesis, embryonic dev; GWAS: schizophrenia	gall bladder cancer	many	ubiquitous: tonsil, gall bladder, pituitary fem reprod.	LT, mo/mph, LTc, brain, colon, ovary, testismainy cell types	endometrium, thyroid	N/Y	0
12874	ZIC3	Zic family member 3	HTX1 HTX, ZNF203	Xq26.3		TF, left-right body axis formationM; pluripotency regulator	visceral heterotaxy & derivatives		brain, nervous tissue, lymphoblast (stem cells)	brain-neuropile outer layer, old testis (nuclei, Sertoli o PGA)	low	N	10
29377	ZMAT1	zinc finger matrin-type 1	KIAA1789	Xq22.1		TF, unknown	unknown	neutrophils		adrenal cortex, testis-Sertoli-Leydig, Epidydimis, SmMu	thyroid, ovary, spleen	weird	0
13054	ZMYM3	zinc finger MYM-type containing 3	ZNF261 ZNF198L2, DXS6673E, KIAA0385, MYM	Xq13.1	NM_201599	gene silencer, part histone deacetylase-containing multiprotein complex	congenital myastenia, dystonia			lymphoid tissue neurons, thyroid, spleen, nuclei epithelia, many	ovary, testis, brain	N/Y many tissues	10
13107	ZNF41	zinc finger protein 41	MRX89	XP11.3	NM_153380	gene-specific transcriptional repression	mental retardation, night blindness	platelets	yes, 12% up	bone marrow, thyroid gland, lymphoid tissue	thyroid, ubiquitous		0
13145	ZNF75D	zinc finger protein 75	ZNF82, ZNF75 ZKSCAN24, D8C6, ZSCAN28	Xq26.3	NM_007131	TF, unknown	unknown			neurons, thyroid, spleen, nuclei epithelia, many	prostate, adrenal, spleen, thyroid, LN	Y/N	0
13156	ZNF81	zinc finger protein 81	MRX45 HFZ20	Xp11.23	NM_007137	TF, unknown	mental retardation, night blindness			epithelia	ubiquitos low	N	0
12942	ZNF157	zinc finger protein 157	HFZ22	Xp11.3	NM_003446	neg. Gene expression	unknown	CNS	NI	UR	brain, thyroid	N	6
13001	ZNF182	zinc finger protein 182	ZNF21 KOX14, HHZ150, Zfp182	Xp11.23	NM_006962	proliferation & differentiation - NUCLEUS cytosol	night blindness	uterus, platelet	NI	UR RBC	thyroid, lymphatic tissue	Y/N	10
12976	ZNF185	zinc finger protein 185 with LIM domain		Xq28	NM_007150	proliferation & differentiation - cytosol	unknown	epithelia/glands - cytosol	NI	R many nuclei, glia	esophagus, skin	N	10
13069	ZNF275	zinc finger protein 275		Xq28	NM_001080485	TF, unknown	unknown	adrenal / ovary	NI	epithelial-gland nuclei	adrenal, ovary	N	3
25955	ZNF280C	zinc finger protein 280C	SUHW3 FLJ20095, ZNF633	Xq26.1	NM_017666	TF, unknown	unknown	many cell types	NI	R many nuclei, glia	testis	N	0
21039	ZNF449	zinc finger protein 449	ZSCAN19, FLJ23614	Xq26.3	M_152695	TF, unknown	unknown	breast	NI	UR bile ducts/kidney ducts/Bowman	adrenal, ubiquitos	N	0
28855	ZNF630	zinc finger protein 630	BC037316, dJ54B20.2, FLJ20573, MGC138344	Xp11.23	NM_001037735	TF, unknown	mental retardation	+ (IS normal)	NI	(Neuroepithelium R) SmM	thyroid, ovary	N	0
17625	ZNF674	zinc finger protein 674	MRX92 ZNF673B	Xp11.3	NM_001039891	TF, unknown	mental retardation, retinal dystrophy	bladder	NI	epithelia, (UR))		N	0
13128	ZNF711	zinc finger protein 711	ZNF6 CMPX1, ZNF4, ZNF5, dJ75N13.1, Zfp711, MRX97	Xq21.1	NM_021998	TF, unknown	mental retardation		NI	testis, brain, adrenal gland, LN/thymus, testis-hi		N	0
23019	ZRSR2	zinc finger CCCH-type, RNA binding motif and serine/arginine rich 2	U2AF1L2 U2AF1-RS2, URP, ZC3H22	Xp22.2	NM_005089	splicing factor	myelodysplastic syndrome	ubiquitous: liver, PBMC	leukos: Tc, myeloid, LB	ND (RNA: IS, pituitary)	IS, endometrium	N/Y	0
13198	ZXDA	zinc finger X-linked duplicated A	ZNF896	Xp11.21	NM_007156	Regulation transcription, augments HLA expression 17493635	androgenetic alopecia	ubiquitous	spermatocytes, LB, skelMuscle, CervGanglion; liver, heart, endocrine	ubiquitous	ND	Y/N	0
13199	ZXDB	zinc finger X-linked duplicated B	ZNF905	Xp11.21	NM_007157	TF, cofactor CIITA to promote expression MHC-I and II	none	ubiquitous	liver, NK	liver, heart muscle	ND	Y/N	0

## Sheet: Ygenes-DEF data
HGNC	Name	Name meaning	Synonyms	Locus	NM-	Function	Disease	RNA expr: Genecard	RNA expr: biogps	Protein expr: ProteinAtlas	RNA expr: ncbi	IS-related	SystemFunctionCode
8227	AKAP17A	A-kinase anchoring protein 17A	721P, AKAP-17A, CCDC133, CXYorf3, DXYS155E, PRKA17A, SFRS17A, XE7, XE7Y, B-lymphocyte surface Ag, splicing factor Arg,Ser-rich	xp22.33 + Yp11.2	NM_005088.2	spliceosome/alternative splicing	null cell leucemia, chronic tic disorder (IR FcER pathway, allograft rejection, gene DRD4)	blood, liver, spleen	lymph tissue	lymph tissue, ubiquitous	spleen, BM, LN, lung, ovary, ubiquitous	Y	1
266	AMELY	amelogenin Y-linked	AMGL, AMGY	yp11.2	NM-001143	biomineralization during tooth enamel development	amelogenesis imperfecta, caries, endocervicitis	jaws, thyroid, pancreas, testis	no data	no data	testis, gall bladder, prostate	N	10		Key
438	ASMT	acetylserotonin O-methyltransferase	ASMTY, HIOMT, HIOMTY	xp22.33 + Yp11.2	NM_001171038/9	final step melatonin synthesis	pineoblastoma, pineal tumor, psychiatric disorders: affective, bipolar	pineal gland, CNS, intestine	no data	unreliable	ubiquitous, ovary, BM, LN; spleen	N/Y	3		Y = yes
8623	ASMTL	acetylserotonin O-methyltransferase-like	ASMTLXY, ASTML, ASMTL	xp22.33 + Yp11.2		unknown, putative unique fusion	postnatal death, severe intelectual + physical abnormalities in many body parts, patau syndrome chr13 trisomy: abnormalities urogenital, neural, facial, heart, eye development , carney complex variant	CNS, liver, adrenal, BM, intestine, ubiquitous-cytosol	LT, thyroid, liver, heart, CNS, ubiquitous	ubiquitous	ubiquitous	N/Y	10		N = no
9083	BPY2	basic charge Y-linked 2	BPY2A, VCY2, VCY2A	Yq11.223	NM_004678	spermatogenic failure, male infertility	sperm cell development, male infertility	testis	testis	ND	testis	N	7		ND = no data
442867	BPY2B	basic charge Y-linked 2B	VCY2B	Yq11.23	NM_001002760.1	may be: spermatogenic failure, male infertility	sperm cell development, male infertility	testis	ND	ND	testis	N	7		- = no data
442868	BPY2C	basic charge Y-linked 2C	VCY2C	Yq11.23	NM_001002761.1	may be: spermatogenic failure, male infertility	sperm cell development, male infertility	testis	ND	ND	testis	N	7		BM = Bone marrow
4267	CD99	Xg blood group	HBA71, MIC2, MIC2X, MIC2Y, MSK5X	xp22.33 + Yp11.2		diapedesis, cell adhesion, blood group-rosette formation erythrocytes	tumors: thymus, testicular fibroma, nailbed, ewing = neuroepithelial + eye	ubiquitous, CNS, blood, skin, liver,	thymus, spinal cord, NK, lymphos, blood cells male reprod. Tract	ubiquitous, LT; reprod. Tissue, pancreas		Y	1		CNS = Central nervous system
9085	CDY1	chromodomain Y-linked 1, testis-specific -	CDYA, CDY1	Yq11.23	NM_004680, NM_170723	gene repressor in late spermatids; Histone hyperacetylation	spermatogenic failure, male reprod system disease	testis: spermatids; monocytes, adipocytes	testis	ND	testis	N/Y	7		CT = Connective tissue
253175	CDY1B	chromodomain Y-linked 1B	CDY	Yq11.23	NM_001003895.1	gene repressor in late spermatids: histone hyperacetylation	spermatogenic failure, male reprod system disease	testis: spermatids; monocytes, adipocytes	heart, liver, muscle	ND	testis	N/Y	7		DC = Dendritic cell
9426	CDY2A	chromodomain Y-linked 2A	CDY, CDY2	Yq11.222		gene repressor in late spermatids: histone hyperacetylation, preference H4	spermatogenic failure, male reprod system disease	testis	heart, liver, muscle	ND	-	N	7		DT = Digestive tract
203611	CDY2B	chromodomain Y-linked 2B	CDY	Yq11.223		acyl/acetyl transferase activity	none	testis	heart, liver, muscle	ND	-	N	7		GIT = Gastrointestinal tract = DT
64109	CRLF2	Cytokine receptor like factor 2	CRL2Y, TSLPR, CRLF2	xp22.33 + Yp11.2	NM_001012288, NM_022148	thymic stromal lymphopoietin protein receptor: complex TSLP + IL7R to stimulate proliferation via STAT3 and STAT5	lymphoblastic leucemia, GIT allergy	monocytes, blood, LN; spleen, lung, thymus	hematopoyetic	ND	appendix, BM, gall bladder	Y	1		HSC = Hematopoyetic stem cell
1438	CSF2RA	colony stimulating factor 2 receptor alpha subunit	CD116, CDw116, CSF2RX, CSF2RAY, CSF2RX, CSF2RY, GM-CSF-R-alpha, GMCSFR, GMR, SMDP4, alphaGMR, CSF2RA	xp22.33 + Yp11.3	NM_001161529 till 32; NM_006140	GM-CSFR alpha subunit	pulmonary alveolar proteinosis, acute basophilic leucemia, surfactant metabolism dysfunction	moncyte, placenta, spleen	Lymphatic, mainly mo-lineage	unreliable, placenta, spleen	placenta, appendix, lymph node	Y	1		IS = Immune system
1617	DAZ1	deleted in azoospermia 1	SPGY	Yq11.223	NM_004081	may regulate mRNA translation, promotes meiosis in spermatogenesis	spermatogenic failure, male infertility, azoospermia	testis	testis	testis, spermatogonia	premeiotic sperm cells	N	7		LB = B lymphocyte
57055	DAZ2	deleted in azoospermia 2	pDP1678	Yq11.223	NM_001005785 till 6; NM_020363	RNA-BP with role in spermatogenesis	spermatogenic failure, male infertility, azoospermia	testis	heart muscle	testis (postmeiosis), kidney PCT	premeiotic sperm cells	N	7		LT = T lymphocyte
57054	DAZ3	deleted in azoospermia 3	pDP1679	Yq11.23	NM_020364	may regulate mRNA translation, spermatogenesis	spermatogenic failure, male infertility, azoospermia	testis	premeiotic sperm cells	testis (postmeiosis)	premeiotic sperm cells	N	7		LN = Lymph node
57135	DAZ4	deleted in azoospermia 4	pDP1680, pDP1681	Yq11.24		may regulate mRNA translation, spermatogenesis	spermatogenic failure, male infertility, azoospermia	testis, stomach	testis (Leydig)	tesist, kideney, stomach	stomach, testis	N	7		NK = Natural killer cell
8653	DDX3Y	DEAD-box helicase 3 Y-linked	DBY	Yq11.221	NM_001122665, NM_001302552, NM_004660, NM_001324195	DEAD = Asp-Gly-Ala-Asp RNA helicase, translation initiation, cell growth, embryogenesis	spermatogenic failure, male infertility, azoospermia, leucemia	testis: spermatogonia, CNS; spleen	LN: PMN, mononuclear cells, NK, (Not LB), HSC, pineal, male reprod.	germ centers-tonsil, exocrine pancreas, ubiquitous	BM, testis	Y	1		NS = Nervous system
207063	DHRSX	dehydrogenase/reductase X-linked	CXorf11, DHRS5X, DHRS5YY, DHRSY, SDR46C1, SDR7C6, DHRSX	xp22.33 + Yp11.2	NM_145177	positive regulation of starvation-induced autophagy	none	brain, intestine, exocrine pancreas	ND	brain, exocrine pancreas, adrenal gland,	ubiquitous, kidney, liver,	N	0		PBMC = Peripheral blood mononuclear cells, i.e. monocytes & lymphocytes
9086	EIF1AY	eukaryotic translation initiation factor 1A Y-linked	eIF-4C	Yq11.223	NM_004681, NM_001278612	maximizes protein synthesis speed	none	ubiquitous, overexpressed: brain, pancreas, lymphocytes, heart, kidney, gonads	early erythroid	unreliable, ubiquitous	BM, heart	N/Y	0		PFC = Prefrontal cortex
8225	GTPBP6	GTP binding protein 6	PGPL	xp22.33 + Yp11.31	NM_012227	unknown	none	LB, muscle, CNS, lung	ND	ubiquitous	kidney, spleen	N/Y	0		PMN = Neutrophil
86614	HSFY1	heat shock transcription factor Y-linked 1	HSF2L, HSFY	Yq11.222	NM_152584	transcriptional activation HSF expression	spermatogenic failure, male infertility	testis, brain!	ND	testis	testis (brain)	N	7		PNS = Peripheral nervoys system
159119	HSFY2	heat shock transcription factor Y-linked 2	HSF2L, HSFY	Yq11.223	NM_153716	transcriptional activation HSF expression	spermatogenic failure, male infertility	testis, brain!	ND	testis	testis (brain)	N	7		Tc = Cytotoxic T cell
3563	IL3RA	interleukin 3 receptor subunit alpha	CD123, IL3RY, IL3RX, IL3RY, hIL-3Ra, IL3RA	xp22.33 + Yp11.2	NM_001267713, NM_002183	IL-3 receptor (also on GM-CSFR) + IL-5R)	difteria, lupus, blood cancer, blastic NK cancer	lung, CNS, lymphoid tissue	dendritic cells, lungs	brain, fallopian tube, BM, LT	lymphoid tissue, bladder & gall bladder	Y	1		Th = Helper T cell
3581	IL9R	interleukin 9 rec.	CD129, IL-9R	Xq28 + Yq12	NM_002186, NM_176786	signal transduction, cell proliferation	astma, (B cell-derived cancer)	LT	LT, mainly B or its cancers	LT	lymphoid tissue, bladder & gall bladder	Y	1
8284	KDM5D	lysine demethylase 5D	HY, HYA, JARID1D, SMCY	Yq11.223	NM_001146705, NM_001146706, NM_004653	demethylates specifically K4 of histone 3, transcription repression, spermatogenesis?, minor histocomp Ag: male-to-female graft rejection	spermatogenic failure, male infertility	blood, BM, (immune) CNS	LN: HSC, lymphos, Th, DC; pineal (testis)	DT, LT, male reprod.	DT, LT, male reprod.	Y	1
22829	NLGN4Y	neurligin 4 Y-linked	NLG5	Yq11.221		adhesion molecules at synapse sites	autism-Asperger, intellectual disability	brain, pancreas	brain	brain	brain, prostate, bladder	N	2
286530	P2RY8	P2Y receptor family member 8	P2Y8	Xp22.33 + Yp11.2	NM_178129	purine-regulated G-protein-coupled	none /B-cell lymphoblastice leukemias after P2RY8/CRLF2 fusions	PBMC	LT, lymphos espTcd4+	LT ( GC + LN-medulla, spleen hardly)	LN, spleen, appendix, BM	Y	1		Code key
83259	PCDH11Y	protocadherin 11 Y-linked	PCDH-PC, PCDH22, PCDHX, PCDHY	Yp11.2	NM_001278619	cell-cell recognition in CNS development; Ca2+-dep cell adhesion	none (x-form PCDH11X: dyslexia)	brain, CNS	brain	unreliable	brain,	N	2		Functions biol system
55344	PLCXD1	phosphatidylinositol specific phospholipase C X domain containing 1	LL0XNC01-136G2.1	xp22.33 + Yp11.31-2	NM_018390	unknown (lipid metabolism, seems to favor proliferation)	none	lung, skin	ND	reprod., CNS, thyroid, LT	skin, BM, DT, spleen	N	0		0	U	ubiquitous, basal metabolism/functions, unknown
28227	PPP2R3B	protein phosphatase 2 regulatory subunit B¨beta	NYREN8, PPP2R3L, PPP2R3LY, PR48, PR70	xp22.33 + Yp11.31	NM_013239, NM_199326	Ser/Thr-phosphatase, inh. Cell growth	none	CNS, testis, fetal liver	heart	CNS, skel. Muscle, heart, testis	heart, testis, skin,	N	10		1	IS	immune system
100533178	PRORY	proline rich Y-linked	CYorf17	Yq11.223	NM_001282471.1	unknown	none	ND	many	DT	DT	N	0		2	NS	nervous system
9081	PRY	PTPN13 like Y-linked	PRY1, PTPN13LY	Yq11.223	-	unknown	spermatogenic failure, male infertility, azoospermia, abnormal genital physiol	testis, spermatids, spermatozoa	many	ND	testis	N	7		3	ES	endocrine system
442862	PRY2	PTPN13 like Y-linked 2	PTPN13LY2	Yq11.223	-	unknown	spermatogenic failure, male infertility, azoospermia, abnormal genital physiol	testis, spermatids, spermatozoa	many	unreliable	testis	N	7		4	DRT	digest & respir tracts
5940	RBMY1A1	RNA binding motif protein y-linked, fam 1 member A1	RBM, RBM1, RBM2, RBMY, RBMY1C, YRRM1, YRRM2	Yq11.223	NM_005058, NM_001320944, NM_001320945	involved in splicing, spermatogenesis	hemophilus meningitis, spermatogenic failure, azoospermia,	CNS, platelet	testis, PNS (cervical), muscle	testis, spermatocytes	no data	N/Y	7		5	TS	tegumentary system, skin & acces
378948	RBMY1B	RNA binding motif protein y-linked, fam 1 member B	-	Yq11.223	1006121.3, NM_001320948.1	involved in splicing, spermatogenesis	none	testis	testis, PNS (cervical), muscle	testis, spermatocytes	testis	N	7		6	US	urinary system
378949	RBMY1D	RNA binding motif protein y-linked, fam 1 member D	-	Yq11.223	NM_001006120.3	involved in splicing, spermatogenesis	male reprod disease	testis	testis, PNS (cervical), muscle	testis, spermatocytes	testis	N	7		7	RS	reprod system
378950	RBMY1E	RNA binding motif protein y-linked, fam 1 member E	-	Yq11.223	NM_001006118.2	involved in splicing, spermatogenesis	none	testis	testis, PNS (cervical), muscle	testis, spermatocytes	testis	N	7		8	CV	cvs circulation
159163	RBMY1F	RNA binding motif protein y-linked, fam 1 member F	YRRM2	Yq11.223	NM_001303410.1	involved in splicing, spermatogenesis	none	tesis, (serum)	testis, PNS (cervical), muscle	testis, spermatocytes	testis	N	7		9	MECT	musc.skel, connective tissue
378951	RBMY1J	RNA binding motif protein y-linked, fam 1 member J	-	Yq11.223	NM_001006117.3	involved in splicing, spermatogenesis	none / azoospermia	tesis, (serum)	testis, PNS (cervical), muscle	testis, spermatocytes	tesits	N	7		10	GDD	growth, diff, dev
6192	RPS4Y1	ribosomal protein S4 Y-linked 1	RPS4Y, S4	Yp11.2	NM_001008	ribosome component, protein synthesis	Turner syndrome	lung, stomach, CNS, skin, spleen ubiquitous	LT, Th, B-not	ubiquitous, except for muscle	ubiquious, prostate	N	0
140032	RPS4Y2	ribosomal protein S4 Y-linked 2	RPS4Y2P	Yq11.223	NM_001039567.2	ribosome component, protein synthesis	spermatogenic failure, male infertility, azoospermia	testis, prostate, heart, brain,	ND	unreliable	testis, prostate, BM, appendix, spleen	N	7
6473	SHOX	short stature homeobox	GCFX, PHOGY, SS,	Xp22.33 + Yp11.2	-	homeobox = linearidad: control growth, development, differentiation	Turner syndrome, short stature,	sc adipose, musculoskeletal, skin, etc.	heart, liver, muscle	unreliable	adipose tissue	N	10
293	SLC25A6	solute carrier fam 25 member 6	AAC3, ANT, ANT 2, ANT 3, ANT3, ANT3Y	Xp22.33 + Yp11.2	NM_001636	exchange ADP-ATP across mitochondrial mb; formation pore complex, pro-apoptosis	adenoma, neoplasia reprod syst. Influenza	ubiquitous	IS: thymus, leukos; CNS: retina, pineal; endocrine, DT, RespTract	ubiquitos, (LT little)	ubiquitous	y/n	10
10251	SPRY3	sprouty RTK signaling antagonist 3	spry-3	Xq28 + Yq12	NM_001304990	possible antagonist FGF, neg. Regulation organogenesis	Legius syndr. (= facial anomalies, neurofibromatosis, incl immunodef,)	ubiquitous, fetal, CNS	non-spec	unreliable	ubiquitous	Y/N	10
6736	SRY	sex determining region Y	SRXX1, SRXY1, TDF, TDY	Yp11.2	NM_003140	testis-determining region , Transcription factor	XY females, gonadal dysgenesis	testis, skin, (BM, blood)	cingulate cortex, DRG, (poco LT)	testis, skin	-	N/Y	7
90665	TBL1Y	transducin beta-like 1 Y-linked	TBL1	Yp11.2	-	may be signal transduction, corepressor/part of proteasome complex	none	heart, thyroid, prostate, fetal brain	heart, liver, muscle	unreliable, ubiquitous	prostate	N	0
90655	TGIF2LY	TGFB induced factor homeobox 2 like Y-linked	TGIFLY	Yp11.2	-	homeobox, linearity, TF, regulator/competitor female homolog	none	testis, endocr pancreas	ND	testis	-	N	7
9087	TMSB4Y	thymosin beta 4 Y-linked	TB4Y	Yq11.221	NM_004202	actin sequestrin, inhibits polymerization	none	ubiquitous, cns	ubiquitous,	DT, male reprod.	prostate, DT	N	0
7258	TSPY1	testis-specific proteinY-linked 1	CT78, DYS14, TSPY, pJA923	Yp11.2	NM_003308, NM_001197242, NM_001320964	may be involved in spermatogenesis	gonadoblastoma, seminoma, sudden infant death with dysgenesis of testes syndrome	testis	testis	testis, spermatogonia	testis	N	7
64591	TSPY2	testis-specific proteinY-linked 2	TSPYQ1	Yp11.2	NM_022573.2	unknown	none	testis	ND	testis, spermatogonia	testis	N	7
728137	TSPY3	testis-specific proteinY-linked 3	CT78	Yp11.2	NM_001077697.2	unknown	none	testis	testis	testis, spermatogonia	testis	N	7
728395	TSPY4	testis-specific proteinY-linked 4	-	Yp11.2	NM_001164471.1	unknown	none	testis	testis	testis, spermatogonia	testis	N	7
728403	TSPY8	testis-specific proteinY-linked 8	-	Yp11.2	NM_001243721.1	unknown	none	testis	testis	testis, spermatogonia	testis	N	7
100289087	TSPY10	testis-specific proteinY-linked 10	TSPY10, TSPY8	Yp11.2	NM_001282469.2	unknown	persistent mullerian duct syndrome	testis/blood	testis	testis, spermatogonia	testis	N	7
8287	USP9Y	ubiquitin-specific peptidase 9 Y-linked	DFFRY, SPGFY2	Yq11.221	NM_004654	Regulation protein turn over; SMAD-TGFbeta signaling; Cleaves ubiquitin from ubiquitin-marked proteins	spermatogenic failure, male infertility, azoospermia	eye, CNS, embryonic ubiquitous	LT, pineal	unreliable	prostate, testis	Y/N	0
7404	UTY	ubiquitously transcribed tetratricopeptide repeat containing Y-linked	KDM6AL, KDM6C1	Yq11.221	NM_001258249-tru-53	protein-protein interaction, minor histocompatibility gene, graft rejection male stem cells	kabuki syndrome = congenital disorder affecting many organs/tissues	pancreas, heart, blood	LT, brain, male reprod.	LT, brain, male reprod.	prostate, DT	Y/N	0
6845	VAMP7	vesicle-associated mb prot7	SYBL1, TI-VAMP, TIVAMP, VAMP-7	Xq28 + Yq12		late endosomal /lysosomes, fusion to transport vesicles	immunedef, tetanus, gonadal dysgenesis, autism, dementia	ubiquitous, CNS, blood, skin, liver,		ubiquitous	ubiquitous, placenta, kidney	Y	1
9084	VCY	variable charge Y-linked	BPY11, VCY1A	Yq11.221	NM_004679.2	unknown; small, highly charged proteins; spermatogenesis	chronic laryngitis, spermatogenic failure	spermatocyte precursor	testis, muscle, PNS	spermatocyte precursor		N/Y	7
353513	VCY1B	variable charge Y-linked 1B	BPY1B	Yq11.221	-	unknown; small, highly charged proteins	chronic laryngitis	spermatocyte precursor	testis, muscle, PNS	spermatocyte precursor	testis	N/Y	7
9189	ZBED1	zinc finger BED-type containing 1	ALTE, DREF, TRAMP, hDREF	Xp22.33 + Yp11.2	NM_004729, NM_001171135+6	transcription factor, cell proliferation	laryngostenosis	placenta, spleen, testis, liver, CNS	liver, DC, LB, NK, retina, pineal, adrenal	unreliable	ubiquitous	N	10
7544	ZFY	zinc finger protein Y-linked	ZNF911	Yp11.2	NM_001145275+6, NM_003411	transcription factor, master regulation proliferation	cystadenofibroma, frasier syndrome, XY females, with urogenital defects	nasal, epithelium, spleen, Tc, NK, B	male reprod, appendix	ubiquitours, tonsils	ubiquitous, male reprod system	N	0

## Sheet: PAR-DEF data
HGNC	Gene name	Name meaning	Synonyms	Locus	NM-	Function	Disease	RNA expr: GeneCard	RNA expression: Biogps	Protein expression: ProteinAtlas	RNA expression: NCBI	IS-related	SystemFunctionCode
18783	AKAP17A	A-kinase anchoring protein 17A	CXYorf3, SFRS17A, XE7, XE7Y, DXYS155E, MGC39904, 721P, CCDC133	Xp22.33 & Yp11.32	NM_005088							Y	1		Key
750	ASMT	acetylserotonin O-methyltransferase	HIOMT, ASMTY, HIOMTY	Xp22.3 & Yp11.3	NM_004043	melatonin synthesis; life & daily cycle							3		Y = yes
751	ASMTL	acetylserotonin O-methyltransferase like	-	Xp22.3 & Yp11.3	NM_004192	unknown, putative unique fusion	postnatal death, severe intelectual + physical abnormalities in many body parts, patau syndrome chr13 trisomy: abnormalities urogenital, neural, facial, heart, eye development , carney complex variant	CNS, liver, adrenal, BM, intestine, ubiquitous-cytosol	LT, thyroid, liver, heart, CNS, ubiquitous	ubiquitous	ubiquitous	N/Y	10		N = no
7082	CD99	CD99 molecule (Xg blood group)	MIC2	Xp22.33 and Yp11.3	NM_001122898							Y	1		ND = no data
14281	CRLF2	cytokine receptor like factor 2	CRL2, TSLPR	Xp22.3 and Yp11.3	NM_022148							Y	1		- = no data
2435	CSF2RA	colony stimulating factor 2 receptor alpha subunit	CSF2R CD116, alphaGMR	Xp22.32 and Yp11.3	M64445							Y	1		BM = Bone marrow
18399	DHRSX	dehydrogenase/reductase X-linked	DHRS5X, DHRSXY, DHRSY, DHRS5Y, SDR46C1, SDR7C6	Xp22.33 and Yp11.2	NM_145177	starvation-induced autophagy	none	unreliable	PMN	many			0		CNS = Central nervous system
30189	GTPBP6	GTP binding protein 6	PGPL, FLJ20977	Xp22.33 & Yp11.32	NM_012227	enzyme	none		IS, endo, liver, heart		CT		0		CT = Connective tissue
6012	IL3RA	interleukin 3 receptor subunit alpha	CD123	Xp22.3 & Yp13.3	M74782							Y	1		DC = Dendritic cell
6030	IL9R	interleukin 9 receptor	CD129	Xq28 & Yq12	NM_002186							Y	1		DT = Digestive tract
15524	P2RY8	P2Y receptor family member 8	P2Y8	Xp22.3 & Yp11.3	NM_178129							Y	1		GIT = Gastrointestinal tract = DT
23148	PLCXD1	phosphatidylinositol specific phospholipase C X domain containing 1	FLJ11323	Xp22.33 & Yp11.32	NM_018390	unknown but mainly in CD34+ cell, Tc, Th y leucemia	none	lung, skin	Tc, Th, HSC	reprod., CNS, thyroid, LT	skin, BM, GIT, spleen	N	0		HSC = Hematopoyetic stem cell
13417	PPP2R3B	protein phosphatase 2 regulatory subunit B''beta	PPP2R3L PPP2R3LY, PR48, PR70	Xp22.3 & Yp11.3	NM_013239	Br-regulatory unit may regulate substrate specificity of phosphatase	none	testis, fetal liver	heart	ND (RNA: muscle)	heart, testis	N	10		IS = Immune system
10853	SHOX	short stature homeobox	PHOG, GCFX, SS, SHOXY	Xp22.33 & Yp11.32	NM_000451	growth and devlopment via retinoic acid and phorboly-12.myristate	dyschondreostosis, short stature, turner,	fibroblast, bone, muscle, adipocyte, mesenchyme	many	many	adipose (CT)	N	10		LB = B lymphocyte
10992	SLC25A6	solute carrier family 25 member 6	ANT3 ANT3Y, MGC17525	Xp22.3 & Yp11.3	NM_001636	Mitochondrial ADP/ATP-antiporter: apoptosis	male reprod benign neoplasm, oftalmoplegia, influenza	many	IS: leukos, thyroid, prostate, lung	unreliable, many	many	N/Y	10		LT = T lymphocyte
11271	SPRY3	sprouty RTK signaling antagonist 3	HSPRY3	Xq28 & Yq12	NM_005840	may be antagonist FGF, modulate respiratory tract organogenesis	Legius syndrome = neurofibromatosis, incl. Immunodefi	widely, fetal, NS	non-spec	unreliable	many	N	10		LN = Lymph node
11486	VAMP7	vesicle associated membrane protein 7	SYBL1, VAMP-7, TI-VAMP	Xq28 & Yq12	NM_005638							Y	1		NK = Natural killer cell
447	ZBED1	zinc finger BED-type containing 1	ALTE, TRAMP, KIAA0785, DREF, hDREF	Xp22.33 & Yp11	NM_004729	master regulator proliferation, cell cycle, promotor histone H1	laryngostenosis	monocyte, LB, Tc, spleen colon, adrenal, placenta	liver, IS: DC, LB, NK; adrenal	unreliable	placenta, spleen, testis	N	10		NS = Nervous system
															PBMC = Peripheral blood mononuclear cells, i.e. monocytes & lymphocytes
total genes	18														PFC = Prefrontal cortex
															PMN = Neutrophil
Excluded: pseudogenes, RNA genes; non-pseudoautosomal characteristic															PNS = Peripheral nervoys system
31957	GAGE2B	G antigen 2B	-	Xp11.23	NM_001098411	cancer/testis Ag fam; expr inducible with demethylation; presented by HLA-I									Tc = Cytotoxic T cell
31958	GAGE2C	G antigen 2C	-	Xp11.23	NM_001472	cancer/testis Ag fam; expr inducible with demethylation; presented by HLA-I									Th = Helper T cell
31959	GAGE2D	G antigen 2C	GAGE8	Xp11.23	NM_001098407	cancer/testis Ag fam; expr inducible with demethylation; presented by HLA-I
4101	GAGE4	G antigen 4	CT4.4	Xp11.4-p11.2	NM_001474	cancer/testis Ag fam; expr inducible with demethylation; presented by HLA-I
4102	GAGE5	G antigen 5	CT4.5	Xp11.4-p11.2	NM_001475	cancer/testis Ag fam; expr inducible with demethylation; presented by HLA-I
4103	GAGE6	G antigen 6	CT4.6	Xp11.4-p11.2	NM_001476	cancer/testis Ag fam; expr inducible with demethylation; presented by HLA-I									Code key
4104	GAGE7	G antigen 7	CT4.7, GAGE-7	Xp11.4-p11.2	NM_021123	cancer/testis Ag fam; expr inducible with demethylation; presented by HLA-I									Functions biol system
4106	GAGE8	G antigen 8	CT4.8	Xp11	NM_012196	cancer/testis Ag fam; expr inducible with demethylation; presented by HLA-I									0	U	ubiquitous, basal metabolism/functions, unknown
4105	GAGE12I	G antigen 12I	GAGE7B	Xp11.23	-	cancer/testis Ag fam; expr inducible with demethylation; presented by HLA-I									1	IS	immune system
460	AMD1P2	adenosylmethionine decarboxylase 1 pseudogene 2	AMD2, AMD, AMDP1, AMDPX, AMDPY	Xq28 & Yq12	NG_001073										2	NS	nervous system
25811	ASMTL-AS1	ASMTL antisense RNA 1	CXYorf2, NCRNA00105, ASMTLAS, ASMTL-AS	Xp22.3 & Yp11.32	XR_040863	melatonin synthesis; life & daily cycle									3	ES	endocrine system
7083	CD99P1	CD99 molecule pseudogene 1	MIC2R, NCRNA00103, CXYorf12, CD99L1	Xp22.33 and Yp11.31	NR_033380										4	DRT	digest & respir tracts
37115	DDX11L16	DEAD/H-box helicase 11 like 16	-	Xq28 & Yq12	NG_006978.2	pseudogene									5	TS	tegumentary system, skin & acces
38713	DHRSX-IT1	DHRSX intronic transcript 1	DHRSXIT1, DHRSX-IT	Xp22.33 and Yp11	-										6	US	urinary system
38719	DPH3P2	diphthamide biosynthesis 3 pseudogene 2	-	Xq28 & Yq12	-										7	RS	reprod system
38160	ELOCP24	elongin C pseudogene 24	TCEB1P25, TCEB1P24	Xq28 & Yq12	-										8	CV	cvs circulation
38717	FABP5P13	fatty acid binding protein 5 pseudogene 13	FABP5L13	Xp22.33 & Yp11.32	-										9	MECT	musc.skel, connective tissue
30470	LINC00102	long intergenic non-protein coding RNA 102	NCRNA00102	Xp22.33 & Yp11.31	-										10	GDD	growth, diff, dev
31843	LINC00106	long intergenic non-protein coding RNA 106	CXYorf8, NCRNA00106	Xp22.33 & Yp11.32	-
27560	LINC00685	long intergenic non-protein coding RNA 685	XYorf10, NCRNA00107, PPP2R3B-AS1	Xp22.33 & Yp11.32	-
37720	RPL14P5	ribosomal protein L14 pseudogene 5	-	Xp22.33 & Yp11.32	NG_009084
23270	TRPC6P	transient receptor potential cation channel subfamily C member 6, pseudogene	TRPC6L	Xq28 & Yq12	NG_005687
38967	MIR3690	microRNA 3690	MIR3690-2, MIR3690-1, hsa-mir-3690, hsa-mir-3690-2	Xp22.32 & Yp11.3	NR_037461		PAP = Pulmonary Alveolar Proteinosis; Surfactant metabolism dysfunction, CSF2ra-def
50179	MIR6089	microRNA 6089	MIR6089-1, MIR6089-2, hsa-mir-6089-1	Xp22.3 & Yp11.3	NR_106737	may control CD99 expr or LINC00102
31685	WASH6P	WASP family homolog 6, pseudogene	FAM39A, CXYorf1	Xq28 & Yq12	NG_008380
38513	WASIR1	WASH and IL9R antisense RNA 1	NCRNA00286B	Xq28 & Yq12	-	non-protein coding; WASH and ILgR anti-sense RNA
12808	XGR	XG and CD99 regulator	YG	Xp22.32 & Yp11	-	locus that controls expresssion of Xg (blood group and CD99 = MIC2)
TOTAL	27
