# Supplementary material for: SeXY chromosomes and the immune system: reflections after a comparative study
Source: Biol Sex Differ. 2020 Jan 14;11:3. doi: 10.1186/s13293-019-0278-y (PMC6958619; doi:10.1186/s13293-019-0278-y)
Supplement: Supplementary file 2 — Additional file 2. Doubtful cases discarded as ISRG. This Excel file contains three sheets; the first for codes, the second provides 23 genes that were pre-selected as candidate ISRG, but did not pass the Bgee filter, and the third sheet presents a 79-item list of the 2008 Fish publication with updated information and the system code assigned by us, in accordance with Additional file 1. [file 13293_2019_278_MOESM2_ESM.xlsx]

## Sheet: System-ISfunction-Codes
System codes									Function codes for immune genes
0	U	ubiquitous, basal metabolism/functions, unknown							0	unknown
1	IS	immune system							1	proliferation & apoptosis
2	NS	nervous system							2	LB development & activation
3	ES	endocrine system							3	LT development & activation
4	DRT	digest & respir tracts							4	leukocyte distribution
5	TS	tegumentary system, skin & acces							5	Innate immune system & inflammation
6	US	urinary system							6	Immune regulation, incl. epigenetics
7	RS	reprod system							7	signal transduction
8	CV	cvs circulation
9	MECT	musc.skel, connective tissue
10	GDD	growth, diff, dev
Key Systems, tissues or cells in expression data
unreliable	The Human Protein Atlas indicates that the used antibodies for the gene product so far unreliable data.
unrel.	is unreliable; see above
B	B cell
BM	Bone marrow
BU	Basal metabolism or Ubiquitous
DC	Dendritic cell
CNS	Central nervous system
ddd	Debe
DRG	Dorsal root ganglion
DT	Digestive tract
HSC	Haematopoyetic stem cell
IS	Immune system
LN	Lymph node
ND	No data
NK	Natural killer cell
NS	Nervous system
PBMC	Peripheral blood mononuclear cells
PMN	Polymorphonuclear cell or neutrophil
PNS	Peripheral nervous system
T	T cell
Tc	Cytotoxic T
TF	Transcription factor
Th	Helper T

## Sheet: doubtful ISRG
HGNC	name	Final System Code Annotation	synonyms	locus	NM-	Function	Disease	Expr: Genecard	Expr: biogps	Expr: Protein atlas	Expr: ncbi	Bgee/Uniprot n/10:r,r	Exclusion reason	LTEEG	GO:0002376 immune system process	ISRG decision	Pmid	XCI (Balaton)	SexExprBias (Tukiainen)
560	AP1S2	0	MRX59, MRXS5, PGS, SIGMA1B	Xp22.2	NM_003916	sorting in (late) transGolgi network/endosomes; AgPresentation (biogps)	mental retardation, hydrocephalus, basal ganglia disease	PBMC, NK, LN, brain, ubiquitous	oocyte; leukos: monocytes, blood cells	mail reprod, female reprod. (NOT IS)	endometrium, heart	3:7,8,10	D0-E0.5-F0.5	No	Yes	No		E	F		Key (data from publications of Balaton and Tukiainen)
20893	BCOR	10	FLJ20285, KIAA1575	Xp11.4	NM_017745	transcriptional corepressor, neg osteodentiogenic capacity	Microphthalmia, glioblastoma, myxoid leiomyosarcoma	NS, liver	thymus, Tc, NK, (pineal, cervical ganglion)	unreliable	LN, BM, thyroid	0:15	D0-E0.5-F0	No	No	No		S	NS		S	Subject to X chromosome inactivation (XCI)
17342	BRWD3	10	FLJ38568, MRX93	Xq21.1	NM_153252	role cell morphology & cell division	mental retardation, B-cell chronic lymphocytic leukemia.	many	NS: DRG; myeloid lineage	LN strong	many	0:13,16	D0-E0.5-F0	No	No	No		S	F		E	Escape from XCI
2745	DDX3X	10	DDX3 DBX, HLP2, DDX14	Xp11.4	NM_024005	multifunctional RNA helicase	mental retardation (corpus callosum agenesis); T-cell leucemia, lymphocytic choriomeningitis, childhood medulloblastoma	BM, NS	Ubiquitous, incl. leukos	NS, endocrine, reprod	BM, LN, appendix	2:8,9	D0-E0.5-F0	No	Yes	No		E	F		V	Variable behaviour; cells with XCI and escape from XCI
2890	DKC1	10	DKC XAP101, dyskerin, NAP57, NOLA4, Cbf5 "H/ACA ribonucleoprotein complex subunit 4"	Xq28	NM_001363	ribosome biogenesis, telomere maintenance; in proliferative cells	dyskeratosis congenita = BM failure, leukoplakia, skin pigmentation & nail dystroph, pancytopenia	PBMC, Tcell, many	IS: HSC; pineal	many: nasopharynx, bronchus	BM, LN, appendix	0:14,20	D0-E0.5-F0	No	No	No		S	NS		D	Discordant data
4839	HCFC1	10	HFC1, MRX3 HCF-1, HCF1, CFF, VCAF, MGC70925, PPP1R89 "VP16-accessory protein", "protein phosphatase 1, regulatory subunit 89	Xq28	NM_005334	cell cycle control; multiprotein-DNA complex formation with viral transactivator protein	homocysteinemia, mental retardation, herpes simplex, lymphangitis; GWAS: SLE	LN, PBMC, heart, fetal tissues, kidney	heart, liver, PNS (cervical), CNS (parts, pineal), leukos	ND (RNA: many;thymus, spleen)	BM, spleen, LN, appendix	0:20	D0-E0.5-F0	No	No	No		V	NS		*	Few exceptions to the main classification
5042	HNRPH2	0	HNRPH2 hnRNPH', FTP3, HNRPH'	Xq22.1	NM_019597	pre-mRNA processing	mental retardation, agammaglobulinemia, amytrophic lateral sclerosis	ubiquitous: spleen, blood, heart, kidney	DT, pineal, CNS: PFC+amygdala, IS: myeloid, mo, NK, DC, lymphos	many, incl IS	brain, kidney,adrenal appendix	0:20	D0.5-E0-F0	No	No	No		S	-		F	Female expression bias
28381	MOSPD2	2	MGC26706	Xp22.2	NM_152581	monocyte-PMN migration in response to chemokines; PMN degranulation; innate immune system	VACTERL + hydrocephalus (ventriculomegaly)	IS: monocytes++, PMN, Bone, NS	IS: granulocytes, monocytes; NS	unreliable	thryoid, brain, skin	1:9,11,14	D0-E0-F0.5	No	Yes	No	28137892 (Disesae and article inconsistent)	S	M		M	Male expression bias
7423	MTCP1	10	P13MTCP1, p8MTCP1, C6.1B	Xq28	NM_001018025	mature LT proliferation; enhances phosphorylation + activation of AKT1 + 2; discovered in T cell	T cell leukemia, queensland tick thyphus	many, blood, IS: NK, Tc	PNS, cardiac muscle	testis, skin	testis, heart	0:-	D0.5-E0-F0.5	No	No	No		S	NS		NS	No expression bias (non-significant differences)
7449	MTMR1	7	-	Xq28	NM_003828, NM_176789	phosphoinositol-3P phosphatase, lipid metabolism	charco-marie-tooth disease (=neuronal-muscle disease)	NS, liver, (muscle)	IS++: DC, lymphos, thymus, tonsil, placenta; NS; pineal, amigdal	Sm Muscle, many	IS: LN, spleen; esophagus	1:7,11=thymus	D0-E0.5-F0	No	No	No		S	NS		-	Inconsistent expression bias or no data
19374	NKRF	2	ITBA4, NRF	Xq24	NM_017544	transcriptional repression NFkB responsive genes, silencing IFN-b rec, cytokine-induced iNOS induction, regulation IL-8 transcription	cardiomyopathy, familial	many: lung, monocytes, PBMC	NS; pineal, hypothalamus, PFC; IS: lymphos	NS	brain, LN	0:-	D0-E0-F0.5	No	No	No		S	NS
7871	NONO	0	NRB54, NMT55, P54NRB, P54, PPP1R114 "Nuclear RNA-binding protein, 54-kD", "non-Pou domain-containing octamer (ATGCAAAT) binding protein", "protein phosphatase 1, regulatory subunit 114	Xq13.1	NM_007363	transcription reguluation; role in innate IR against DNA virus	mental retardation, cancers, pyomyositis = rare bacterial infection skelMuscle	many; IS. LN; ovary, m	IS: thymus, leucos; NS: pineal	many	many	0.04375	D0-E0.5-F0.5	No	Yes	No	27084935	S*	NS		Key Systems, tissues or cells in expression data
2567	OFD1	10	CXorf5, RP23 71-7A, JBTS10	Xp22.2	NM_003611	cilia assembly, centrosome/centriole assembly, needed for development & homeostasis; OFD1 = oro-facial-digital syndrome protein 1	enhances celiac disease, embryologic face anomalies, acerebellar, fibrosis	fetal ovary, monocytes, many	LN, DC+++++, NK; lymphos, all, pineal (bit)	thyroid/parathyroid	many: LN	0:14,20	D0.5-E0.5-F0	No	No	No		E*	F		unreliable	The Human Protein Atlas indicates that the used antibodies for the gene product so far unreliable data.
9792	RAB9A	0	RAB9	Xp22.2	NM_004251	transfer between endosome and GA, lysosoma, phagocytic vesicle; melanosome trafficking	none	PBMC, bone, many	IS: NK, myeloid, monocytes	ubiquitous	adrenal	0:-	D0-E0.5-F0.5	No	Yes	No		E*	-		unrel.	is unreliable; see above
9896	RBM10	0	DXS8237E, KIAA0122, GPATC9, ZRANB5, GPATCH9, S1-1	Xp11.3	NM_005676	mRNA splicing, incl NFkB promotors, inflammation involved	spinal cord ependymoma & glioma, lymphogranuloma venereum (bacterial infection), tarp syndrome (cardiovasc)	BM, PBMC	IS: leukos,thymus;pineal	ubiquitous, incl. IS	ovary, spleen, LN	0:20	D0.5-E0.5-F0.5	No	No	No		S	NS		B	B cell
9910	RBMX	0	RNMX, hnRNP-G, HNRNPG "heterogeneous nuclear ribonucleoprotein G	Xq26.3	NM_002139	supraspliceosome, tumor suppression, motor neuron survival, IL-1B signaling;	mental retardation; association autoimmunity	NS, nasal epithelium, many	thymus, IS: leucos, pineal, GIT,	ubiquitous, incl. IS	ovary, placenta, LN	0:18	D0-E0.5-F0.5	No	No	No		S	NS		BM	Bone marrow
10432	RPS6KA3	2	MRX19, CLS RSK2, HU-3	Xp22.12	NM_004586	Ser/Thr-kinase, regulates mitogenic & stress response, survival	megaencephalus; mental retardation = neuronal, endocrine, bone mental	IS: LN; musculoskel, liver, NS	IS; Tc, Th, most; pineal, muscle	unrel: ubiquitous, incl. IS	appendix, LN; lung, coloon	1:8,12	D0-E0.5-F0	No	Yes	No		S	M		BU	Basal metabolism or Ubiquitous
11577	TAZ	0	CMD3A, EFE2, EFE BTHS, XAP-2, G4.5, TAZ1 "Barth syndrome", "transcriptional coactivator with PDZ-binding motif	Xq28	-	acyltransferase (lipid metabolism) for mitochondria; cardiolipin and other lipids remodeling enzyme; heart dev; dengue viral host factor; association rheumatoid arthritis, DM-1, celiac disease	cardiomyopathy, familial	brain, muscle, heart	Tc, Th, B (Dengue viral host factor; Sessions)	Muscle: sm; cardiac muscle: Z-discs	brain, spleen, LN	4:1,2,8,9	D0-E0.5-F0	No	Yes	No		S	M		DC	Dendritic cell
28912	WDR45	0	WDRX1 JM5, WIPI4, NBIA5	Xp11.23	NM_007075	autophagy pathway to lysosome; phosphoinositide interacting	neurodegeneration with brain iron accumulation 5, visual epilepsy	muscle, heart, liver, bone, ovary	pre-ery; IS: NK, DC; heart, liver; pineal;	unreliable, epidydimis	thyroid, bladder, adrenal	1:4,11	D0-E0.5-F0	No	No	No		S	M		CNS	Central nervous system
592	XIAP / BIRC4	10	PI3, BIRC4 hILP	Xq25	NM_001167	Apoptosis suppressor; interaction proteins apoptosis regulation	lymphoproliferative syndrome, dysgammaglobulinemia	PBMC, pancreas	ubiquitous	ubiquitous		0:-	D0.5-E0-F0	No	Yes	No		S	M		ddd or DDD	Development, differentiation
17407	ZC3H12B	2	CXorf32 MCPIP2 "MCP induced protein 2"	Xq11.2-q12	XM_293334	Regulation pro-inflammatory activation of Mph pmid18178554	none	BM, plasma,	non-spec	unrel (RNA: NS, DT)	skin, BM, many	0:18	D0-E0-F0.5	No	No	No	18178554	D	F		DRG	Dorsal root ganglion
23019	ZRSR2	0	U2AF1L2 U2AF1-RS2, URP, ZC3H22	Xp22.2	NM_005089	splicing factor	myelodysplastic syndrome	ubiquitous: liver, PBMC	leukos: Tc, myeloid, LB	ND (RNA: IS, pituitary)	IS, endometrium	1:9,16	D0-E0.5-F0	No	No	No		E	F		DT	Digestive tract
13198	ZXDA	0	ZNF896	Xp11.21	NM_007156	Regulation transcription, augments HLA expression 17493635	androgenetic alopecia	ubiquitous	spermatocytes, LB, skelMuscle, CervGanglion; liver, heart, endocrine	ubiquitous	ND	0:18	D0-E0-F0.5	No	No	No	17493635	S	M		HSC	Haematopoyetic stem cell
13199	ZXDB	0	ZNF905	Xp11.21	NM_007157	Similarity-based, ie weak: TF, cofactor CIITA to promote expression MHC-I and II	none	ubiquitous	liver, NK	liver, heart muscle	ND	1:8	D0-E0-F0.5	No	No	No		S	-		IS	Immune system
TOTAL		23																			LN	Lymph node
																					ND	No data
							Explanation of the Bgee code														NK	Natural killer cell
							Bgee/Uniprot n/10:r,r,														NS	Nervous system
							n/10	The number of immune system tissues ranked within the first 10 positions of expression.													PBMC	Peripheral blood mononuclear cells
								The criterion was that it should be at least 5/10. Indicated by: 5:													PFC	Prefrontal cortex
							r	Rank of lymphoid tissue or leukocytes													PMN	Polymorphonuclear cell or neutrophil
																					PNS	Peripheral nervous system
							example 1	3:7,8,10 (0)													T	T cell
								There were 3 immune system listed among the first 10, respectively ranked 7th, 8th and 10th.													TF	Transcription factor
								Annotation code considering Bgee would be 0, indicating that there is no clear system detectable.													Tc	Cytotoxic T
																					Th	Helper T
							example 1	1:9,16 (0)
								Only 1 immune system listed among the first 10. Immune system tissues ranked 9th and 16th													Other
								Annotation code considering Bgee would be 0, indicating that there is no clear system detectable.													LTEEG	Detection by the LTEEG method of 5-fold elevated expression in lymphoid tissue
																					GO:0002376	Detecion as an gene involved in an immune system process
							Explanation Exclusion reason
							System annotation required that at least 1 criterion should relate convincingly (scale: not, 0; good, 1) relate to a system.
							The criteria are: disease (D), expression (E) and function (F).
							Furthermore, none of these doubtful genes passed the Bgee confirmation test as none had a Bgee score that started with 5.
							Example	D0-E1-F0
							Example 1	D0-E0.5-F0	Only expression related with the immune system according,
									but not in the majority of the databases consulted.
							Example 2	D0-E0-F0.5	The gene seemed to have a function that related to the immune system,
									but perhaps due to 1 or 2 publications, or because of domains without strong proof.
							Example 3	D0-E1-F0	Not excluded, but considerted to be an ISRG due to preferred expression in the immune system

## Sheet: Fish NatRevImmunol2008
gene	Fish	current nomenclature	Our study system annotation
AR	Rec & assocProt	AR	ES	3
AGTR2	Rec & assocProt	AGTR2	embryonic/US	10
CSF2RA	Rec & assocProt	CSF2RA	IS	1
GPCR23	Rec & assocProt	LPAR4	embryonic, cardiac muscle; Ca2+ flow; metabolic	10
GPCR50	Rec & assocProt	GPR50	ES	3
GPCR101	Rec & assocProt	GPR101	NS, ES	0
GPCR112	Rec & assocProt	ADGRG4	NS, ES, embryonic, eye	2
GPCR119	Rec & assocProt	GPR119	ES	0
GPCR174	Rec & assocProt	GPR174	IS	1	autoimmunity	Graves
CXCR3	Rec & assocProt	CXCR3	IS	1
CYSLTR1	Rec & assocProt	CYSLTR1	IS	1
IL-1RAP1	Rec & assocProt	ILRAP	chr 3	-
IL-1RAP2	Rec & assocProt	IL-1RAPL2	IS	1
IL-2RG	Rec & assocProt	IL-2RG	IS	1
IL-3RA	Rec & assocProt	IL-3RA	IS	1
IL-9R	Rec & assocProt	IL-9R	IS	1
IL-13RA1	Rec & assocProt	IL-13RA1	IS	1
IL-13RA2	Rec & assocProt	IL-13RA2	IS	1
IRAK	Rec & assocProt	IRAK	IS	1
NGFRAP1	Rec & assocProt	BEX3	NS	2
TLR7	Rec & assocProt	TLR7	IS	1
TLR8	Rec & assocProt	TLR8	IS	1
XSCID	IR-relProt	IL2RG	IS-repeat	-
ELK1	IR-relProt	ELK1	NS (repr)	2
EPAG	IR-relProt	DIAPH2-AS1	RNA-gene	-	RNA-gene
GATA1	IR-relProt	GATA1	CVS	8
GTD	IR-relProt	NROB1	ES; Repr Syst	3
IDDMX	IR-relProt	none/obsolete	-	-	promotor region FOXP3 (Bassuny 2003 pmid 12750858)
IGBP1	IR-relProt	IGBP1	IS	1
IGSF1	IR-relProt	IGSF1	ES	3
ITGB1BP2	IR-relProt	ITGB1BP2	CVS	9
CD99	IR-relProt	CD99	IS	1
MTCP1	IR-relProt	MTCP1	growth/dev	10
PFC	IR-relProt	CFP	IS	1
TIMP1	IR-relProt	TIMP1	ubiquitous	0
CD40L	IR-relProt	CD40L	IS	1
Z39IG	IR-relProt	VSIG4	IS	1
RHOGAP	Transcr-translReg	ARHGAP4	IS	1
CDC42GEF6	Transcr-translReg	ARHGEF6	IS	1
CDC42GEF9	Transcr-translReg	ARHGEF9	IS	2
ETK	Transcr-translReg	BMX	unknown	0
BTK	Transcr-translReg	BTK	IS	1
CDX4	Transcr-translReg	CDX4	embryonic	10
TRAP170	Transcr-translReg	MED14	unknown	0
DUSP9	Transcr-translReg	DUSP9	embryonic	10
DUSP21	Transcr-translReg	DUSP21	unknown	0
EEF1alpha13	Transcr-translReg	-	pseudogene	-
EEFbeta4	Transcr-translReg	-	pseudogene	-
EIF1A	Transcr-translReg	EIF1AX	ubiquitous	0
EIF2a	Transcr-translReg	EIF2S3	ubiquitous	0
FOXP3	Transcr-translReg	FOXP3	IS	1
GAB3	Transcr-translReg	GAB3	IS	1
HDAC6	Transcr-translReg	HDAC6	ES, embryonic	3
HDAC8	Transcr-translReg	HDAC8	ES,	3
IKKγ	Transcr-translReg	IKBKG	IS	1
MAPKKK15	Transcr-translReg	MAP3K15	ES	3
NFκBRF	Transcr-translReg	NKRF	NS	2	ubiquitous, highest CNS
NRK	Transcr-translReg	NRK	ubiquitour, Reprod	10	ubiquitour, Reprod, embryonic
NXF2	Transcr-translReg	NXF2	Repr.S, ubiquitous	7
NXF3	Transcr-translReg	NXF3	Repr.S, ubiquitous	7
NXF4	Transcr-translReg	NXF2B	Repr.S, ubiquitous	7
NXF5	Transcr-translReg	NXF5	Repr.S, ubiquitous	2
PAK3	Transcr-translReg	PAK3	NS	2
PPP1	Transcr-translReg	?	unknown	0
PPP2	Transcr-translReg	PPP2R3B	CVS, ReprS	8	Heart
PPP6	Transcr-translReg	?	unknown	0
PRKCI	Transcr-translReg	PRKCI/PRKX	ES	10
S6K	Transcr-translReg	RPS6KA3	NS, IS, ubiquitous	2	IS doubtfuls, ubiquitous HPA: discarded
SWI/SNF	Transcr-translReg	SMARCA1	ES, embryonic	10
STK9	Transcr-translReg	CDKL5	NS	2
TAF1	Transcr-translReg	TAF1	M,CT, ubiquitous	9
UBE1	Transcr-translReg	UBE1	ubiquitous	0
UBE2A	Transcr-translReg	UBE2A	ubiquitous	0
USP9	Transcr-translReg	USP9X	repr.S, ubiquitous	0	testis, pineal, placenta		USP9Y	ES	3
USP11	Transcr-translReg	USP11	NS, many	2
USP26	Transcr-translReg	USP26	repr.S, ubiquitous	7		13
USP27	Transcr-translReg	USP27X	ubiquitous	0	unreliable
USP511	Transcr-translReg	USP51	ubiquitous	0
WASP	Transcr-translReg	IS	IS	1
total		79	IS	25
renamed		38	0	15
		41	2	10
			3	7
			7	4
			8	2
			9	2
			10	8
			-	6	pseudo, RNA, non-ex, repeat
			TOTAL	79
