# Supplementary material for: SeXY chromosomes and the immune system: reflections after a comparative study
Source: Biol Sex Differ. 2020 Jan 14;11:3. doi: 10.1186/s13293-019-0278-y (PMC6958619; doi:10.1186/s13293-019-0278-y)
Supplement: Supplementary file 3 — Additional file 3. X-linked ISRG. This Excel file contains 2 sheets; the fist with a code key and the second with DEF data, XCI status and sex-biased expression for each ISRG. It formed the basis for Fig. 2 and Additional file 7. [file 13293_2019_278_MOESM3_ESM.xlsx]

## Sheet: Codes
Functions biol system													Function IS-genes
0	U	ubiquitous, basal metabolism/functions, unknown											0	unknown
1	IS	immune system											1	proliferation & apoptosis
2	NS	nervous system											2	LB development & activation
3	ES	endocrine system											3	LT development & activation
4	DRT	digest & respir tracts											4	leukocyte distribution
5	TS	tegumentary system, skin & acces											5	Innate immune system & inflammation
6	US	urinary system											6	Immune regulation, incl. epigenetics
7	RS	reprod system											7	signal transduction
8	CV	cvs circulation
9	MECT	musc.skel, connective tissue
10	GDD	growth, diff, dev
	TOTAL
S	subject to XCI									NS	Sex neutral expression
S	mostly subject to XCI; seldomly XCI escap									F	female bias
V	variably subject to XCI or XCI escape									M	male bias
PAR	PAR: XCI escape
D	discordant data on XCI or XCI escap
ND	not determined
Key Systems, tissues or cells in expression data
unreliable	The Human Protein Atlas indicates that the used antibodies for the gene product so far unreliable data.
unrel.	is unreliable; see above
B	B cell
BM	Bone marrow
BU	Basal metabolism or Ubiquitous
DC	Dendritic cell
CNS	Central nervous system
ddd	Debe
DRG	Dorsal root ganglion
DT	Digestive tract
HSC	Haematopoyetic stem cell
IS	Immune system
LN	Lymph node
ND	No data
NK	Natural killer cell
NS	Nervous system
PBMC	Peripheral blood mononuclear cells
PMN	Polymorphonuclear cell or neutrophil
PNS	Peripheral nervous system
T	T cell
TF	Cytotoxic T
TF	Cytotoxic T
Th	Helper T

## Sheet: X-ISRG
HGNC	Name	Total	Function code	Synonyms	Locus	NM-	Function	Disease	Expression: Genecard	Expression: BioGPS	Expression: Protein atlas	Expression: ncbi	Expression Bgee x/10:rank	XCI (Balaton)	SexExprBias Tukiainen pmid 29022598
18783	AKAP17A	1	2	721P, CCDC133, CXYorf3, DXYS155E, MGC39904, SFRS17A, XE7, XE7Y	Xp22.33 +Yp11.32	NM_005088	B-cell activation, Protein kinase A anchoring protein. Part of the spliceosome complex.	Null-cell leukemia, chronic tic disorder	Blood, liver, spleen, PBMC, fetal ovary	leukos: NK, DC, ly	Kupffer cell, IS B-cell areas, mesangial, collecting tubules kidney	BM, spleen	3:6,8,10 (IS,ES)	PAR	M		Key Systems, tissues or cells in expression data
17889	APEX2	1	2	APE2, APEXL2, XTH2, ZGRF2	Xp11.21	-	somatic hypermutation, class switch recombination Ig genes; endodeoxyribonuclease, expression in blasts	none	BM, lung	oocyte; leukos: monocytes, blood cells	unreliable	many	1:7 (IS; BU,0)	S	NS		unreliable	The Human Protein Atlas indicates that the used antibodies for the gene product so far unreliable data.
674	ARHGAP4	1	4,5	C1, KIAA0131, p115, RhoGAP4, SrGAP4	Xq28	NM_001666	neutrophil chemotaxis, neg regulation; rhoGAP; redistribution microtubules. Golgi location, small GTP-binding proteins;	nephrogenic diabetes insipidus.	PBMC, LN, monocytes	Leukos: all, Th more	BM, IS strong		4:1,2,3,9	D	F		unrel.	is unreliable; see above
685	ARHGEF6	1	1	alpha-PIX, alphaPIX, Cool-2, Cool2, KIAA0006, MRX46	Xq26.3	NM_004840	association many autoimmune diseases, Guanine nt exchange factor; formation lamellipodia	mental retardation, cancers respiratory system,	NS, BM, liver, blood cells	Leukos: all, more Th	IS: LN + tonsil + female reprod/fat tissue		2:2,9 (CT, IS)	S	NS		B	B cell
1133	BTK	1	2	AGMX1, ATK, IMD1, PSCTK1, XLA	Xq22.1	NM_000061	Crucial role in B-cell development.	X-linked agammaglobulinemia (XLA)	PBMC, LN, platelet, adipose	leukos; hardly on NK and T	BM, IS		7:1-4,6,7,10	S	NS		BM	Bone marrow
28909	CCDC22	1	5,6	CXorf37, JM1	Xp11.23	NM_014008	NFkB signalling	mental retardation, cerebellar malformation, heart defects (Ritscher-Schinzel syndrome)	liver, leukocytes, LN	leukocytes, thymus	unreliable	IS: spleen, BM, LN	2:1,4 (0)	S	NS		BU	Basal metabolism or Ubiquitous
11935	CD40LG	1	2,3	CD154, CD40L, gp39, hCD40L, HIGM1, IMD3, TNFSF5, TRAP	Xq26.3	NM_000074	Tsurface Ag; B cell activation	inability Ig-class switch, hyperIgM; toxoplasmosis, rubella	IS: Th	Th	IS: Th	IS: LN	5:1-5	V	M		DC	Dendritic cell
7082	CD99	1	4	MIC2	Xp22.32 + Yp11.3	NM_001122898	T cell adhesion, leukocyte extravasation; activates a caspase-indep apoptosis in T cell	thymic epithelial tumor, ewing sarcome	many: NS, blood	thymus, NK	BM, spleen, LN, other: reprod. tissue	many: reprod. fat	1:2thymus	PAR	M		CNS	Central nervous system
8864	CFP	1	5,6	PFC	Xp11.23	NM_002621	alternative complement pathway of the innate immune	properdin deficiency, complement deficiency, gacute poststreptococcal glomerulonephritis, neisseria meningitidis infection	spleen, BM, blood	IS: DC, myeloid,	IS	spleen, BM, appendix	6:1-4,6,10	S	F		ddd	Debe
14281	CRLF2	1	3	CRL2, TSLPR	Xp22.3 + Yp11.3	NM_022148	thymic stromal lymphopoietin receptor, cell proliferation via STAT3 + 5	lymphoblastic leukemia, gastrointestinal allergy, down syndrome	PBMC, LN, spleen, Tcell	skel.Muscle, CNS	ND	appendix, BM, gall bladder	1: 1,14,15	PAR	ND		DRG	Dorsal root ganglion
2435	CSF2RA	1	1,5	CSF2R CD116, alphaGMR "alpha-GM-CSF receptor	Xp22.32 + Yp11.3	-	GM-CSF rec, low affinity; proliferation & differentiation hematopoyetic cells	(hereditary) pulmonary alveolar proteinosis, acute basophilic leukemia, crest syndrome (=scleroderma, CT disorder , Ca deposits in CT, Raynaud)	PBMC, BM, spleen, LN	IS: DC, myeloid,	unreliable	placenta, appendix, LN	3:1,4,7	PAR	M		DT	Digestive tract
4540	CXCR3	1	4,5	GPR9 CKR-L2, CMKAR3, IP10-R, MigR, CD183	Xq13.1	-	proliferation + survival mesangial, chemotaxis, IFNg induction in T cells	cutaneous lupus erythematosus, pulmonary sarcoidosis, intermediate uveitis, mycosis fungoide, contact dermatitis	PBMC, spleen, DT: Tc (heart, kidney, liver, muscle, endothelium)	IS: DC, Th	IS organs	LN, spleen, appendix	6:1,2,4,6,7,10	S!!	NS		GWAS	Genome-wide expression study
25667	CXorf21	1	0		Xp21.2	NM_025159	unknown (GWAS: SLE); lower pH in Mph lysosomes in women; IFNg response and promotor interactions (PMID 31092820)	none, but associated Lupus	blood	PNS, muscle, adrenal; IS: myeloid, mo, LB, DC	unreliable (IS, endocrine)	IS: appendix, BM, LN	4:6-9	V/D	F		HSC	Haematopoyetic stem cell
2578	CYBB	1	5	CGD GP91-PHOX, NOX2 "NADPH oxidase 2	Xp21.1-p11.4	-	NADPH oxidase 2; Possible a primary componente of the microbicidal oxidase system of phagocytes	immune def, CGD, atypical mycobacteriosis	spleen, blood: PMN, mo; NS, liver	IS: BM: myeloid, mo, DC, NK	IS: BM	IS	5:1,2,4-6	S	NS		IS	Immune system
17451	CYSLTR1	1	4,5	CysLT1, CysLT(1), CYSLT1R	Xq21.1	-	Receptor cysteinyl leukotrienes, bronchoconstriction; eosinophil migration	Asthma, adenoide hypertrophy, rhinitis, sinusitis, bronchial disease	spleen, leukos	PNS	IS (lung: mph)		3:1,4,5	S	NS		LN	Lymph node
23483	DOCK11	1	2	FLJ32122, FLJ43653, ZIZ2, ACG "zizimin2"	Xq24	NM_144658	B-cell development in BM and marginal zone; guanine nt exchange factor: GDP-GTP	none	PBMC, nasal epithelium, LN	non-spec	unrel. (RNA: adipose, IS)	adipose, IS organs	3:3,5,10 (CT)	S*	F		ND	No data
3319	ELF4	1	5,7	MEF, ELFR	Xq26.1	NM_001421	development&function; NK, NKT & innate; transcription factor, promotes: CSF2, IL3, IL8, lysozyme; development&function; NK, NKT & innate		blood	thymus, BM, blood	many, MALT	BM, placenta	4:1,2,4,6	S	F		NK	Natural killer cell
6106	FOXP3	1	3, 6	IPEX JM2, XPID, AIID, PIDX, DIETER, SCURFIN	Xp11.23	NM_014009	transcription factor for Treg; inhibits Th17	immune dysregulation, polyendocrinopathy, autoimmunity syndrome	blood, IS	adrenal, pineal, NS, myeloid	IS	IS	3:3,5,8	S	NS		NS	Nervous system
17515	GAB3	1	5	DOS/Gab family member 3", "Gab3 scaffolding protein	Xq28	NM_001081573	unknown; (macrophage differentiation)	none	blood, spleen, platelet, Tc, LN	BM, tonsil, leukos	many (RNA: IS)	spleen, BM, appendix, LN	4:3,5,7,10	S*	F		PBMC	Peripheral blood mononuclear cells
30245	GPR174	1	6	FKSG79, GPCR17, LYPSR3	Xq21.1	NM_032553	putative purine rec (GPC)	autoimmune polyendocrine syndreom	DT, spleen, blood	non-spec	IS	ND	5:1-5	V	NS		PMN	Polymorphonuclear cell or neutrophil
5461	IGBP1	1	2	IBP1 , "alpha 4"	Xq13.1	-	CD79-BP; CD79 is part BCR; IgM rec-associated	labyrinthitis, agenesis corpus callosum, mental retardation, hypertelorism	heart, skel muscle, pancreas, kidney, blood	IS: leukos>>; IS organs; pancreas, fetal brain,	ubiquitous: LN, DT, fem.reprod.	ovary, fetal brain	0:17 (ddd,10)	S*	NS		PNS	Peripheral nervous system
5961	IKBKG (NEMO)	1	6,7	IP2, IP1, IKK-gamma, NEMO, Fip3p, FIP-3, FIP3, ZC2HC9	Xq28	NM_003639	degrades NFkB inhibitor; innate protection against viral infections	immunodef, pneumococcal infection, ectodermal dysplasia	BM, blood, heart, brain, liver, skin	leukos >>	fallopian tube, many	IS organs, lung, many	3:1,5,6	S*	NS		Tc	Cytotoxic T cell
5974	IL13RA1	1	7,2,5	IL-13Ra, NR4, CD213a1 "IL13 receptor alpha-1 chain", "CD213a1 antigen"	Xq24	NM_001560	cytokine signaling; low-affinity rec IL-13;	scleroderma	cervix, serum, heart, liver, muscle, ubiquitous	leukos: myeloid, mo, DC>>; islet, muscle, colon	ND (RNA: many;liver)	many; DT	0:11 (IS)	S*	NS		TF	Transcription factor
5975	IL13RA2	1	7,2,5	IL-13R, IL13BP, CD213a2, CT19 "cancer/testis antigen 19	Xq23	NM_000640	cytokine signaling; high-affinity rec IL-13;	brain cancers	vessels, brain, lung	testis, pituitary	ND (RNA: testis)	testis	0:- (IS,BMU,NS,ES)	ND	NS		Th	Helper T
5997	IL1RAPL2	1	6	IL-1R9, TIGIRR-1, IL1RAPL-2, IL1R9	Xq22.3	NM_017416	unknown. Biogps: cytokine signaling; regulation presynapse; neuronal activity	autoinflammation, joint disease, ant scleritis, urticaria, eosinophilic cellulitis (Wells syndrome)	brain, ovary, heart	PNS (cervical); pineal-day;	unreliable (RNA: brain, endocrine, IS)	brain, endocrine	0:- (NS,ES)	D	NS
6010	IL2RG	1	6,7	SCIDX1, IMD4, CIDX, CD132	Xq13.1	-	common subunit various cytokine rec	cvid, lymphopenia, omenn syndrome	IS organs: PBMC, Tc	thymus, tonsil, LN: leukos	IS organs	IS organs	8:1-5,7-10	ND	NS
6012	IL3RA	1	1,7	CD123	xp22.33 + Yp11.2	-	IL-3 rec;	diphteria, leukemia, chilblain lupus, blastic plasmacytoid DC	lung, NS: IS: spleen, LN; blood	lung; DC >>>	brain, oviduct	IS organs	1:6,20 (ddd,10)	PAR	M		Explanation of the Bgee code
6030	IL9R	1	1,7	CD129	Xq28 + Yq12	NM_002186	IL-9 rec; escapes X-inact	asthma	hematopoyetic	testis (interstitial), cardiac muscle	IS, DT, bladder	IS, DT, bladder	4:2,3,5,6	S	M		Bgee/Uniprot n/10:r,r,
6112	IRAK1	1	5,7	IRAK, pelle	Xq28	-	antiviral state; TLR/IL-1R signaling, induction IFN-type I	lupus, mumps, pneumonia; mental retardation	ubiquitous: serum, lung, bone	leukos >>, resp tract	ubiquitous: IS	ubiquitous: IS, DT	1:9,17 (IS)	S*	NS		n/10	The number of immune system tissues ranked within the first 10 positions of expression.
6173	ITM2A	1	6	BRICD2A, E25A "BRICHOS domain containing 2A	Xq21.1	NM_004867	differentiation; plasma cell differentiation, Ig production: target gene of GATA3; osteo y chondrogenic differentiation	none; Graves association:	NS, retina; pancreas, blood, lung, bone	thymus, LN, blood: lymphos; retina, CNS: blasts, lymphos	ND (RNA: thymus, CNS, female reprod)	ovary, adrenal, adipose, LN, heart, various	2:3,10(thymus; IS,NS)	D	NS			The criterion was that it should be at least 5/10. Indicated by: 5:
7219	MPP1	1	5	DXS552E PEMP	Xq28	NM_002436	regulates neutrophil polarity by AKT1 phosphorylation	nasopharyngeal carcinoma, burkitt lymphoma	PBMC, many: NS, blood	BM: HSC, immature leuks & erys	placenta, BM	placenta, BM	6:1,4,6,8-10	S	-		r	Rank of lymphoid tissue or leukocytes
7370	MSL3	1	6	MSL3L1	Xp22.2	NM_006800	chromatin-remodeling; H4 acetylation especially at K-16; role X-inactivation; dosage compensation	none	PBMC, blood, esophagus, NS, liver	IS: LN, leucos	IS (RNA)	LN, appendix, spleen	5; 1-3, 7,9	V	NS
7373	MSN	1	6	-	Xq12	NM_002444	immunosynapse formation; proliferation, migration, adhesion lymphocytes	Immunodef 50, measles, neisseria meningitidis; Robinow syndrome=facial-genital abnormalities; neurofibromatosis II=acne, facial paralysis, sebaceous gl malfunction	IS: LN, blood; many: liver, blood, NS	IS++: NK, myeloid, leukos; BM, thymus, LN, lung	IS+++		4:6,8-10 (IS)	S	F		example 1	3:7,8,10 (0)
29873	NKAP	1	6,7	FLJ22626, "NF kappaB activating protein"	Xq24	NM_024528	transcriptional repressor Notch-signaling abT cell development; also involved in TNFa + IL-1 signaling	none	PBMC, DT, adrenal, placenta	IS: leukos, APC (mo, mph, DC, B)	many, non-spec	many, non-spec	1:6,15,18 (IS,ddd,10)	S*	F			There were 3 immune system listed among the first 10, respectively ranked 7th, 8th and 10th.
7889	NOX1	1	5	NOH1, NOH-1, MOX1, GP91-2 "mitogenic oxidase (pyridine nucleotide-dependent superoxide-generating)", "NADPH oxidase homolog-1", "NADPH oxidase 1 variant NOH-1L"	Xq22.1	NM_007052	respiratory burst; V-gated proton channel, pH control in phagocytes + other cells	synucleinopathy, CGD, vascular disease, retinitis pigmentosa	DT, secretome	DT: colon; cerebellum	unrel. DT	colon	1:7,13 (IS)	ND	NS			Annotation code considering Bgee would be 0, indicating that there is no clear system detectable.
18151	NXT2	1	6	P15-2	Xq23	NM_018698	mRNA nuclear export, protein export import	diverse colitis; IBD (IFN signalling)	ovary, bone, BM, LN, spleen PBMC	testis, IS: DC, NK	LN:IR+++, spec cells, many: NS testis IR+	testis	2:5,6,18 (IS)	S*	NS
25402	OTUD5	1	6	DKFZp761A052, DUBA	Xp11.23	NM_017602	negative regulator of the IS; suppression IFN-I; deubiquinating enzyme	none	retina, fetal liver, PB leukos	IS: leukos: PMN++; epithelia	many	NS: brain; IS: spleen	2:4,5 (IS)	S	NS		example 1	1:9,16 (0)
19906	P2RY10	1	7	P2Y10	Xq21.1	-	putative receptor for G-prot-coupled purines	none, associated rheumatoid arthritis	IS, leukos:B	IS: leukos	IS	IS	7:1-5,7,9	V	NS			Only 1 immune system listed among the first 10. Immune system tissues ranked 9th and 16th
15524	P2RY8	1	6,7	P2Y8	Xp22.33 +Yp11.3	NM_178129	down-regulation on granulocyte regulation; putative receptor for G-prot-coupled purines	none	IS: leukos, heart, kidney	IS: leukos	IS	IS	4:2-4,8	PAR	M			Annotation code considering Bgee would be 0, indicating that there is no clear system detectable.
8987	PIM2	1	1,7	-	Xp11.23	-	cell survival, proto-oncogen; IKB/NFkB-MAPK signaling cell cycle factor kinase	lymphoma, cancer	blood, spleen, heart	IS: Leucos; cancer	ND (RNA: IS	IS	6:1-4,6,9	S	NS
15975	SASH3	1	7,3,2	CXorf9 SLY, 753P9, SH3D6C, HACS2	Xq26.1	NM_018990	may be signal adapter in lymphocytes; pos. Regulation cellular and humoral, innate & adaptive IR; anti-apoptosis; pos. Proliferation	none	BM, spleen	IS: LN,thymus, all; leucos	IS: all IR++	IS	5:1-5	S	NS
15848	SEPT6	1	1	KIAA0128, SEP2, SEPT2, MGC16619, MGC20339	Xq24	NM_145802	actin skeleton organization (during cytokinesis, spermatozoids), HCV virus interference/use	nasopharyngitis, male sexual disorder	many; IS: LN, spleen, Tc; NS	IS: leukos, thymus, adrenal	IS, LN, spleen, tonsil; adrenal	LN, spleen, appendix, adrenal	4:2,3,6,9 (IS,ES)	S*	F
10820	SH2D1A	1	2,3	IMD5, LYP XLP, MTCP1, DSHP, XLPD, EBVS, SAP "Duncan's disease	Xq25	NM_002351	adapter signaling lymphocytic activator , incl. NK, also neurotrophin rec	immune def, dysgammaglobulinema, hemophagocytic lymphohistiocytosis, sel Ig-def.	thymus, blood, spleen LN	thymus,++ lymphos: T, B, NK	ND	IS: LN, spleen	9:1-3,5-10	V	NS
13867	SH3KBP1	1	7,1	CIN85	Xp22.12	NM_031892	adapter signal transduction, endocytosis-lysosomal-, regulation cell stress, Tyr-kinase, MAPK, modulation TNF-induced apoptosis: ligand-bound IgER internalization	immunodef, cancer	blood cells, adrenal, liver:Kupffer	myeloid, monoc/Mph+++	Kupffer, IS: mph!!	LN, spleen, BM	2:4,5,13	S*	F
30681	TAB3	1	7	MAP3K7IP3 "TAK1 binding protein 3	Xp21.2	NM_152787	IL-1 + TNF signal transduction via Map3K/TAK-TRAF2 ; pro-inflammatory signaling	none; association TB	retina, liver, kidney, LN	unspec.	ubiquitous	reprod, BM	1:6, (IS,U)	S	NS
11752	TFE3	1	7	TFEA, bHLHe33 transcription factor E family, member A	Xp11.23	NM_006521	transcription factor, induces CD40L expr in LT for Ab-response, binds to mu-E3motif on Ig	cancer various	NS, BM, liver	ubiquitous, moncytes, myeloid. brain, placenta, thyroid,	many, brain, GIT, BM	many, fat	1:2 (NS)	S*	M
15631	TLR7	1	5,7	-	Xp22.2	NM_016562	PAMP recognition, intracellular, activation NFkB, innate IS	viral infectious dis, basal cell carcinoma	lymphatic tissue	innate IS: DC!!	lymphatic tissue, spleen: red pulp	appendix, IS, placenta	3:1,4,10	S	NS
15632	TLR8	1	5,7	CD288	Xp22.2	NM_016610	PAMP recognition, intracellular, activation NFkB, innate IS	viral infectious dis, hemorrhagic fever, basal cell carcinoma	lymphatic tissue	innate IS	lymphatic tissue, spleen: red pulp	appendix, spleen	5:1-3,7,10	ND	NS
11881	TMSB4X	1	5,6	TMSB4 TB4X	Xp22.2	NM_021109	neg. regulation NFkB; neg. regulation IL-8 secretion; inh. innate IS; inh actin polymerization; identical IFN-inducible gene 6-26, prolif, migration, differentiation		ubiquitous, CNS	lymphatic, monocyt, myeloid, NK	ubiquitous, BM, Kupffer	spleen, lymphnode	3:1,2,6 (IS)	ND	M
3051	TSC22D3	1	1,6	DSIPI DIP, GILZ, TSC-22R, hDIP, glucocorticoid-induced leucine zipper	Xq22.3	NM_198057	IS functions, anti-apoptosis; *BCR signaling; Delta-sleep inducing peptide	none	many: brain, lung, all hematopoietic	leukos: ++	many (liver: mph), incl lymphatic tissues	appendix, adipose tissue	0:12,16 (IS)	S*	NS
11486	VAMP7	1	5	SYBL1 VAMP-7, TI-VAMP	Xq28 and Yq12	NM_005638	granulocyte degranulation, NK-killing, phagosome formation, transport of proteins between vesicles/lysosomes, mb-str	immunodef, tetanus, immuneDef, facial abnormality	many cell types	innate-lymphatic tissue	many		1:3,14,15 (IS)	S	NS
17032	VSIG4	1	6	Z39IG, CRIg	Xq12	NM_007268	phagocyte rec; inhibition complement, LT prolif (neg reg IL-2 produciton) C3b + iC3b complement rec; phagocytic rec; neg regulation mph, complement, IL-2 prod, may be negative regulator LT)	langerhans cell sarcoma, histiocyte rich lymphoma, keratoconjunctivitis sicca/dry eye syndrome	CNS/CSF, lymphatic tissue	lung, placenta	mph /DC(placenta++, liver+)		1:8,	ND	F
12731	WAS	1	1	IMD2, THC WASP, WASPA	Xp11.23	NM_000377	Neutropenia, thrombocytopenia; interacts with proliferation control proteins; actin filament reorganization (pseudopodia formation)	eczema-thrombocytopenia, immune def	lymphatic tissue, BM	lymphatic tissue	lymphatic tissue	lymphatic tissue	7:1-5,7,10	V	NS
16682	ZBTB33	1	7	ZNF-kaiso, kaiso, WUGSC:H_DJ525N14.1, KAISO, ZNF348	Xq24	NM_006777	transcription regulation; binds to methylated CpGdint + kaiso site, repression Wnt signaling	thymoma	lymphos, endothelium	supCervGanglion, heart, pineal	ubiquitous; no muscle	skin, BM, LN	1:2,11,19 (IS, BU,0)	S	NS
TOTAL		54
