# Supplementary material for: SeXY chromosomes and the immune system: reflections after a comparative study
Source: Biol Sex Differ. 2020 Jan 14;11:3. doi: 10.1186/s13293-019-0278-y (PMC6958619; doi:10.1186/s13293-019-0278-y)
Supplement: Supplementary file 4 — Additional file 4. LTEEG data and analysis. This Excel file contains 3 sheets: the first with the gene-chromosome association, the second with the analysis, and the third presents excluded genes. It formed the basis for Table 2 and Fig. 3. [file 13293_2019_278_MOESM4_ESM.xlsx]

## Sheet: Gene-Chr-Association
Gene Name	Chromosome	Synonym
RAG1	11
OR5AK2	11			Source	the Human Protein Atlas /Tissue Atlas			https://www.proteinatlas.org/
MS4A12	11			Date	2019-10-28
IGLL1	22			Select	Tissue atlas/Lymphoid tissue			https://www.proteinatlas.org/humanproteome/tissue/lymphoid+tissue
TGM6	20
HIST1H3J	6			Total genes	1419
NPVF	7
HIST1H3G	6	H3C8
HIST1H2BE	6	H2BC6
HIST1H2BF	6	H2BC7
CCL25	19
HIST1H2AI	6	H2AC13
HIST1H2BH	6	H2BC9
LCE3B	1
HIST1H2AJ	6	H2AC14
MEF2B	19
HIST1H2BM	6	H2BC14
PTCRA	6
HIST1H1B	6	H1-5
HIST1H2AG	6	H2AC11
HIST1H2AK	6	H2AC15
HIST1H3I	6	H3C11
NXPE4	11
CAPN14	2
ADAMDEC1	8
HIST1H2AL	6	H2AC16
HIST1H2BI	6	H2BC10
HIST1H2BO	6	H2BC17
HIST1H3F	6	H3C7
TRAT1	3
HIST1H2BL	6	H2BC13
HIST1H4L	6	H4C13
LYPD8	1
SPIC	12
BLK	8
HIST2H3A	1	H3C15
IL36A	2
PAX1	20
CD8A	2
HIST1H2AB	6	H2AC4
HIST1H2AD	6	H2AC7
PRSS16	6
CD72	9
HIST1H2AH	6	H2AC12
HIST1H2BN	6	H2BC15
HIST1H3B	6	H3C2
LILRA4	19
PAX9	14
PHGR1	15
PSMB11	14
CD1B	1
HIST1H3H	6	H3C10
KCNJ18	17
TCL1A	4
UGT1A7	2
CCR7	17
FBXO43	8
HIST1H2AM	6	H2AC17
NXPE1	11
PITPNM2	12
SEPTIN1	16
TREML4	6
ADGRE1	19
CCL19	9
CD1E	1
CD8B2	2
CYP2U1	4
HIST1H3C	6	H3C3
KRT9	17
LAT	6
LMAN1L	5
PLA2G2E	1
CCL22	16
CLECL1	12
FDCSP	4
HIST2H4A	1	H4C14
IL1F10	2
ITGAD	16
LGALS4	19
LILRA1	19
LY6G6C	6
PRG3	11
SATB1	3
SIGLEC10	19
SMIM28	6
TCF7	5
TIMD4	5
AMTN	4
CD1C	1
CD3D	11
CD5L	1
CLEC12A	12
CLEC9A	12
FCAMR	1
FCER2	9
GPR174	X
H1FX	3
HIST1H3D	6	H3C4
KNL1	15
KRT4	12
LCK	1
MCEMP1	19
NEIL3	4
SPIB	19
TAC1	7
TAS2R40	7
TGM3	20
TLX1	10
ACP7	19
ADORA2A	22
ARL5C	17
BPIFB2	20
CASP5	11
CCR8	3
CCR9	3
CD2	1
CD79A	19
CHRNA3	15
CLEC4M	19
DNA2	10
DNTT	10
FAM129C	8
FAM25C	10
FCRL2	1
GLYATL1B	11
HIST1H2BB	6	H2BC3
HIST1H4D	6	H4C4
IPCEF1	6
KHDC3L	6
KLRC1	12
LILRB1	19
PBK	8
RAG2	11
SBK1	16
SIGLEC11	19
SMIM35	11
SPN	16
SPNS3	17
TNFRSF9	1
UBASH3A	21
ADH7	4
APLNR	11
ARHGDIB	12
ARPP21	3
BANK1	4
BIN2	12
BTLA	3
C20orf204	20
CACNG5	17
CALHM6	6
CCNA2	4
CCR2	3
CD19	6
CD244	1
CD38	4
CENPA	2
CR2	1
DBF4	7
DEFB4B	8
DRD5	4
FBXO5	6
FGR	1
GALR2	17
GZMK	5
HASPIN	17
HIST1H4F	6	H4C6
HIST2H2AA4	1	H2AC19
HIST2H2AB	1	H2AC21
IL17A	6
IL17F	6
IL21R	16
KIF18B	17
KIFC1	6
KLRF1	2
KRT24	17
LCE3C	1
LYPD2	8
MMP9	20
MS4A1	11
MYB	6
OTOA	16
P2RY6	11
PSD4	2
PTPRCAP	11
RBP5	12
SCIMP	17
SERPINA9	14
SERPINB11	18
SERPINB13	18
SIRPG	20
SIT1	9
STAB2	12
TACC3	4
TBC1D10C	11
TERT	5
TLR10	4
TMIGD2	19
TNFAIP8L2	1
VPREB3	22
XCL1	1
ZAP70	2
ADA	20
ANKRD55	5
ARHGAP15	2
ARHGAP25	2
ARHGAP45	19
ASPM	1
B3GNT6	11
BLM	15
BUB1	2
C6orf15	6
CABP4	11
CARMIL2	16
CCR4	3
CCR6	6
CD1A	1
CD247	1
CD300A	17
CD300LF	17
CD3E	11
CD40LG	X
CD7	17
CD8B2	2
CDCA2	8
CDK1	10
CEACAM4	19
CEMIP	15
CENPF	1
CLEC17A	19
CLEC6A	12
CNR2	1		cannabinoid rec
CORO1A	16
CSAG1	x
CSAG3	x
CST7	20
CTSV	9
CXCL13	4
CXCR3	x
CXCR5	11
DOK3	5
DSC3	18
DTL	1
E2F7	12
FAM111B	11
FAM9C	x
FCMR	1
FOXD4L1	2
FPR2	19
GBP6	1
GCA	2
GJB2	13
GMFG	19
GNGT2	17
GP1BA	17
GPC2	7
GPR182	12
GRAP2	22
GZMA	5
H2AFX	11	H2AX
HIST1H1D	6	H1-3
HIST1H1E	6	H1-4
HIST1H4A	6	H4C1
HIST1H4C	6	H4C3
HIST2H2BF	1	H2BC18
IL21R	16
IL22RA2	6
IL2RG	X
IL7R	5
ITK	5
ITLN1	1
KCNA3	1
KIF11	10
KIF14	1
KIR2DL4	19
KRT79	12
LCE3A	1
LEF1	4
LIMD2	17
LRRC55	11
LRTM1	3
LST1	6
MUC21	11
MYO1F	19
NCAPD2	12
NCAPG	4
NCAPH	2
NCF4	22
NFATC3	16
NOX5	15
NUSAP1	15
OR3A2	17
OR4C6	11
PF4	4
PLA2G2D	1
RAC2	22
RAD54L	1
RGS19	20
RPTN	1
S100A12	1
SATB2	2
SELL	1
SIGLEC14	19
SLC17A8	12
SLC26A3	7
SLURP1	8
SNX20	16
SPRR2A	1
SPRR2B	1
SRY	Y
TESPA1	12
TGM1	14
TIGIT	3
TOP2A	17
TREML1	6
UBE2C	20
UHRF1	19
UMODL1	21
VCAM1	1
VNN2	6
VSIG10L	19
ZC3H12D	6
ADGRG5	16
AGAP2	12
ASF1B	19
AURKA	20
BARX2	11
BHLHE23	20
BPIFA1	20
BTK	X
C17orf53	17	HROB
CCL21	9
CCL4	17
CD200R1	3
CD300LB	17
CD3G	11
CD5	11
CD79B	17
CD96	3
CDC25C	5
CDCA5	11
CDCA7	2
CDCA8	1
CEP128	14
CHRNB4	15
CLEC2D	12
CLEC4D	12
CLEC4G	19
CLEC7A	12
CLSPN	1
CNFN	19
COL19A1	6
CSF3R	1
DEFB4A	8
DLGAP5	14
E2F2	1
EPHA8	1
ESCO2	8
FCHO1	19
FCRL1	1
FCRL4	1
FCRLA	1
FOXD4L6	9
FOXE3	1
FUT7	9
GP9	3
GPR15	3
H2BFS	21	H2BS1
HCK	20
HES3	1
HIST1H2AC	6	H2AC6
HIST1H2AE	6	H2AC8
HIST1H2BC	6
HIST1H2BD	6
HIST1H2BJ	6
HIST1H2BK	6
HIST1H4E	6
HIST2H2AC	1
HIST3H2BB	1
HJURP	2
HMGB2	4
HS3ST3B1	17
ICOS	2
IGFLR1	19
IGSF6	16
IL2RA	10
IL36B	2
JAK3	19
KLRD1	12
KNSTRN	15
KRT78	12
LAIR2	19
LILRA2	19
LIME1	20
LTA	6
LY75	2
LY9	1
MS4A7	11
MZB1	5
NCF1	7
NCF2	1
NFE2	12
NLRC3	16
NLRP12	19
NLRP4	19
NUP155	5
OR4D1	17
OSCAR	19
P2RX5	17
P2RY10	X
P2RY13	3
PADI4	1
PIK3CG	7
PIMREG	17
PKMYT1	16
POU2F2	19
PRKCQ	10
PTPRC	1
PTPRH	19
PVRIG	7
RASGRP1	15
RFPL4AL1	19
RNF138	18
RRM2	2
S1PR4	19
SGO1	3
SGO2	2
SH2D1A	X
SIGLEC12	19
SIGLEC7	19
SKA3	13
SLA	8
SLAMF1	1
SLC7A3	X
SNTG1	8
SOX15	17
SPC25	2
STAP1	4
THEMIS	6
TMEM156	4
TMEM26	10
TMPRSS11D	4
TNFSF13B	13
TOX	8
TPX2	20
TRABD2A	2
UCP2	11
ZBED2	3
ZNF804A	2
A2ML1	12
ABCA13	7
ABHD17B	9
ABI3	17
AC091057.5	15	Rho GTPase-activating protein 11B
ACAP1	17
ACOD1	13
ACSM4	12
ACSM6	10
ADA2	22
ADAM19	5
ADAM8	10
ADAMTS17	15
ADCYAP1	18
ADGRE2	19
ADGRF2	6
ADGRG3	16
ADRA1B	5
AFF3	2
AICDA	12
AIF1	6
AIF1L	9
AIM2	1
AIRE	21
AKNA	9
ALDH3A1	17
ALDH3B2	11
ALG1L2	3
ALOX5	10
ANKLE1	19
ANKRD44	2
ANLN	7
ANXA2R	5
AOAH	7
APBB1IP	10
APOBEC3A	22
APOBEC3D	22
APOBR	16
AQP3	9
ARHGAP11A	15
ARHGAP19	10
ARHGAP30	1
ARHGAP4	X
ARHGAP9	12
ARHGEF1	19
ARHGEF39	9
ARL11	13
ARL4C	2
ARRB2	17
ART4	12
ATAD2	8
ATAD5	17
ATG16L2	11
ATP12A	13
ATP2A3	17
ATXN7	3
AURKB	17
B3GALT5	21
B4GALNT2	17
BACH2	6
BATF	14
BCAS4	20
BCL11B	14
BDKRB1	14
BIK	22
BIRC3	11
BIRC5	17
BLNK	10
BMF	15
BORA	13
BPIFB1	20
BRCA2	13
BRIP1	17
BTG1	12
BUB1B	15
C10orf105	10
C10orf99	10
C11orf16	11
C11orf21	11
C12orf56	12
C12orf65	12
C12orf74	12
C15orf48	15
C15orf62	15
C16orf54	16
C1orf112	1
C1orf116	1
C1orf162	1
C1QA	1
C1QB	1
C1QC	1
C21orf58	21
MAB21L4	2	C2orf54
C4orf46	4
C5AR2	19
C6orf132	6
CACNA1I	22
CALHM1	10
CALN1	7
CAMK4	5
CARD11	7
CARD16	11
CARD9	9
CASP1	11
CAPS2	12
CBFA2T3	16
CBL	11
CBX2	17
CCDC15	11
CCDC18	1
CCDC195	2
CCDC88B	11
CCDC88C	14
CCL1	17
CCL11	17
CCL14	17
CCL17	16
CCL18	17
CCL20	2
CCL24	7
CCL3	17
CCM2L	20
CCNB1	5
CCNB2	15
CCND3	6
CCNF	16
CCR1	3
CD160	1
CD163	12
CD163L1	12
CD177	19
CD180	5
CD1D	1
CD207	2
CD209	19
CD22	19
CD226	18
CD27	12
CD28	2
CD300E	17
CD33	19
CD37	19
CD4	12
CD48	1
CD53	1
CD6	11
CD68	17
CD69	12
CD70	19
CD80	3
CD83	6
CD84	1
CDC20	1
CDC25A	3
CDC45	22
CDC6	17
CDCA3	12
CDCA7L	7
CDCP2	1
CDH26	20
CDH3	16
CDH4	20
CDK6	7
CEACAM1	19
CEACAM16	19
CEACAM21	19
CEACAM5	19
CEACAM7	19
CENPE	4
CENPH	5
CENPI	X
CENPK	5
CENPL	1
CENPM	22
CENPO	2
CENPU	4
CEP135	4
CEP55	10
CETP	16
CFP	X
CHD1	5
CHI3L2	1
CHIT1	1
CHMP7	8
CHRM4	11
CIITA	16
CIP2A	3
CKAP2	13
CKAP2L	2
CLCA2	1
CLDN10	13
CLEC10A	17
CLEC2B	12
CLEC4E	12
CLLU1OS	12
CLNK	4
CMKLR1	12
CNOT6L	4
COLQ	3
COTL1	16
CPLX3	15
CPVL	7
CR1	1
CRCT1	1
CRNN	1
CRYBA1	17
CSAG2	X
CSF1R	5
CSK	15
CSTB	21
CTLA4	2
CTSC	11
CTSS	1
CXCL1	4
CXCL10	4
CXCL5	4
CXCL6	4
CXCL9	4
CXCR4	2
CXorf21	X
CYBA	16
CYBB	X
CYP24A1	20
CYP26C1	10
CYP2F1	19
CYTH4	22
CYTIP	2
DAPP1	4
DCANP1	5
DCK	4
DCP2	5
DDIAS	11
DEF6	6
DEFB103A	8
DEFB103B	8
DENND1C	19
DENND2D	1
DEPDC1	1
DEPDC1B	5
DGKA	12
DIABLO	12
DIAPH3	13
DLL1	6
DMRT2	9
DNASE1L3	3
DNMT3B	20
DOCK10	2
DOCK2	5
DOCK8	9
DPPA4	3
DSC2	18
DSCC1	8
DSG3	18
DTX1	12
E2F1	20
E2F8	11
EBF3	10
ECM1	1
ECT2	3
EDAR	2
EDEM1	3
ELF1	13
ELL3	15
ELOVL4	6
EMB	5
EMID1	22
EML6	2
EMP1	12
EOMES	3
EPHB6	7
EPHX3	19
EPSTI1	13
EPX	17
ERCC6L	X
ESPL1	12
ETS1	11
ETV3L	1
EVI2B	17
EVL	14
EVPL	17
EVPLL	17
EXO1	1
EXOC3L1	16
EZH2	7
F2R	5
FAM111A	11
FAM153A	5
FAM163A	1
FAM178B	2
FAM72B	1
FAM72C	1
FAM72D	1
FAM78A	9
FAM83A	8
FAM83C	20
FAM83H	8
FANCA	16
FANCD2	3
FANCI	15
FASLG	1
FBXL12	19
FCAR	19
FCER1G	1
FCGR3A	1
FCRL3	1
FCRL5	1
FCRL6	1
FCRLB	1
FEN1	11
FERMT3	11
FES	15
FFAR2	19
FFAR3	19
FGD2	6
FGD3	9
FGFBP1	4
FHOD1	16
FLI1	11
FLT3	13
FLT3LG	19
FMNL1	17
FOLR3	11
FOXD4L3	9
FOXM1	12
FOXN1	17
FOXO6	1
FOXP3	X
FPR1	19
FRMD1	6
FUT3	19
FUT6	19
FYB1	5
FZD10	12
GABRP	5
GAL3ST2	2
GAL3ST4	7
GALNT7	4
GALNTL6	4
GAS2	11
GBP5	1
GCSAM	3
GDF3	12
GDPD2	X
GDPD3	16
GDPD5	11
GFI1	1
GIMAP2	7
GIMAP5	7
GINS1	20
GINS2	16
GJB3	1
GJB5	1
GJD3	17
GLCCI1	7
GLTP	12
GLYATL2	11
GMIP	19
GNA15	19
GP5	3
GP6	19
GPR132	14
GPR142	17
GPR152	11
GPR171	3
GPR18	13
GPR25	1
GPR31	6
GPR55	2
GPR65	14
GPR82	X
GPSM3	6
GRAP	17
GRAPL	17
GRHL3	1
GSDMC	8
GTSE1	22		CANCER
GYPE	4
GZMM	19
HAPLN3	15
HAS1	9
HCLS1	3
HCST	19
HDAC7	12
HELLS	10
HESX1	3
HIST1H1C	6
HIST1H2BG	6
HIST1H3A	6
HIST1H3E	6
HIST1H4B	6
HIST1H4H	6
HIST1H4J	6
HIST1H4K	6
HIST2H2BE	1
HIST2H3D	1
HIST2H3PS2	1
HIST3H2A	1
HIVEP3	1
HK3	5
HLA-DOA	6
HLA-DOB	6
HLA-DPB1	6
HLA-DQA1	6
HLA-DQA2	6
HLA-DQB1	6
HLA-DQB2	6
HLA-DRA	6
HLA-DRB5	6
HMGA1	6
HMMR	5
HMOX1	22
HOMER3	19
HOXC12	12
HRK	12
HSH2D	19
HTR3A	11
HVCN1	12
HYAL2	3
ICAM2	17
ICAM3	19
IFNA2	9
IFNA21	9
IGLL5	22
IGSF21	1
IHH	2
IKBKE	1
IKZF1	7
IKZF2	2
IKZF3	17
IL10	1
IL10RA	11
IL12B	5
IL12RB1	19
IL16	15
IL17RA	22
IL17REL	22
IL18BP	11
IL18RAP	2
IL1A	2
IL1B	2
IL1R2	2
IL1RN	2
IL2	4
IL22	12
IL23A	12
IL23R	1
IL24	1
IL26	12
IL27RA	19
IL2RB	22
IL3	5
IL34	16
IL36G	2
IL36RN	2
IL6	7
IL7	8
INCENP	11
INPP5D	2
IRF4	6
IRF8	16
ISG20	15
ITGA2B	17
ITGA4	2
ITGAE	17
ITGAL	16
ITGAX	16
ITGB2	21
ITGB7	12
ITIH6	X
ITM2A	X
IZUMO1R	11
JCHAIN	4
KAZALD1	10
KAZN	1
KBTBD8	3
KCNB2	8
KHDC1L	6
RESF1	12	KIAA1551
KIF15	3
KIF18A	11
KIF20A	5
KIF20B	10
KIF22	16
KIF23	15
KIF2C	1
KIF4A	X
KIR2DL1	19
KIR2DL3	19
KIR3DL1	19
KIR3DL2	19
KIR3DX1	19
KISS1R	19
KLF1	19		ERY
KLHL6	3
KLK10	19
KLK11	19
KLK12	19
KLRC3	12
KLRC4	12
KLRK1	12
KNTC1	12
KREMEN2	16
KRT13	17
KRT80	12
KRTAP29-1	17
L1TD1	1
LAG3	12
LAIR1	19
LAPTM5	1
LAT2	7
LAX1	1
LBR	1
LCE3D	1
LCE3E	1
LCN2	9
LCP1	13
LCP2	5
LDLRAD4	18
LGALS9	17
LGALS9C	17
LHX8	1
LILRA5	19
LILRA6	19
LILRB2	19
LILRB3	19
LILRB4	19
LILRB5	19
LINGO3	19
LMNB1	5
LPXN	11
LRMP	12
LRRC25	19
LRRC61	7
LRRK1	15
LTB	6
LTB4R2	14
LY6G6F	6
LY75-CD302	2
LY86	6
LYL1	19
LYN	8
LYPD3	19
LYST	1
LYVE1	11
LZTFL1	3
MAD2L1	4
MADCAM1	19
MAFB	20
MAP4K1	19
MARCH1	4
MARCO	2
MCM10	10
MCM2	3
MCM3	6
MCM4	8
MCM5	22
MCM6	2
MCOLN2	1
MCTP2	15
MCUB	4
MEFV	16
MEI1	22
MELK	9
MFNG	22
MIXL1	1
MKI67	10
MMP12	11
MMP20	11
MMP25	16
MMS22L	6
MND1	4
MPEG1	11
MPHOSPH9	12
MPIG6B	6
MPL	1
MRC1	10
MS4A14	11
MS4A6A	11
MTA3	2
MTF2	1
MTFR2	6
MTNR1B	11
MUC4	3
MUC5B	11
MX2	21
MXD3	5
MYBL1	8
MYBL2	20
MYO1G	7
N4BP2	4
NABP1	2
NAIP	5
NAT14	19
NCAPG2	7
NCCRP1	19
NCKAP1L	12
NCR1	19
NCR2	6
NCR3	6
NDC80	18
NDST3	4
NEK2	1
NEMP2	2
NETO2	16
NFAM1	22
NFATC2	20
NKX2-3	10
NKX2-6	8
NKX3-2	4
NLGN4X	X
NLRC4	2
NLRP11	19
NLRX1	11
NOS2	17
NOS3	7
NOXO1	16
NPFFR2	4
NPY1R	4
NPY5R	4
NR5A1	9
NTN4	12
NUF2	1
NUGGC	8
NUP210	3
OC90	8
OCM	7
OIP5	15
OPN1MW	X
OR10G2	14
OR13A1	10
OR1L8	9
OR2AJ1	1
OR52N4	11
OR56B1	11
OR5B12	11
OR6S1	14
OR9G4	11
ORC1	1
ORC6	16
P2RY8	X-Y-PAR
PADI1	1
PARP15	3
PARPBP	12
PARVG	22
PATL2	15
PAX5	9
PCDH17	13
PCED1B	12
PCLAF	15
PCNA	20
PCSK6	15
PDCD1	2
PDE2A	11
PDE7A	8
PDLIM2	8
PDSS1	10
PEAK3	19
PF4V1	4
PHOX2A	11
PI3	20
PIDD1	11
PIF1	15
PIK3AP1	10
PIK3CD	1
PIK3R6	17
PIM2	X
PITPNM3	17
PITX1	5
PKD1L3	16
PKD2L1	10
PLA2G2F	1
PLA2G4B	15
PLA2G7	6
PLAC8	4
PLCB2	15
PLCG2	16
PLEK	2
PLEKHG1	6
PLEKHN1	1
PLEKHO2	15
PLK1	16
PLK4	4
PLXNC1	12
PNOC	8
POC1A	3
POLE2	14
POLQ	3
POU2AF1	11
PPBP	4
PPL	16
PPP1R16B	20
PRC1	15
PRDM1	6
PRF1	10
PRIM2	6
PRKCB	16
PRR11	17
PRR5-ARHGAP8	22
PRR5L	11
PRSS22	16
PRSS27	16
PSMB9	6
PSORS1C2	6
PSTPIP1	15
PSTPIP2	18
PTGDR2	11
PTGER1	19
PTPN22	1
PTPN6	12
PTPN7	1
PTTG2	4
PYHIN1	1
RAB42	1
RACGAP1	12
RAD51	15
RAD51AP1	12
RAD54B	8
RAET1E	6
RAET1L	6
RASAL3	19
RASGRP2	11
RASGRP4	19
RASSF5	1
RASSF6	4
RCSD1	1
RDM1	17
RECQL4	8
RENBP	X
RETN	19
RFX8	2
RGS10	10
RGS13	1
RGS18	1
RHCG	15
RHOH	4
RIPOR2	6
RMI1	9
RMI2	16
RNASE7	14
RNASEH2A	19
RNASEH2B	13
RNASEK-C17orf49	17
RNF222	17
RNF223	1
RNF225	19
RORC	1
RPL39	X
RPLP1	15
RPS27	1
RRM1	11
RUBCNL	13
RUFY4	2
RUNX1	21
RUNX3	1
S100A7	1
S100Z	5
SAMD1	19
SAMD9	7
SAMSN1	21
SASH3	X
SCAI	9
SCARF1	17
SCGB1D1	11
SCML4	6
SCN11A	3
SELPLG	12
SEMA3D	7
SEMA7A	15
SEPTIN6	X
SERPINB1	6
SERPINB7	18
SERPINB9	6
SERTAD2	2
SFN	1
SH2D2A	1
SHCBP1	16
SHISAL2A	1
SIGLEC1	20
SIGLEC9	19
SIM2	21
SIPA1	11
SIRPB2	20
SKA1	18
SKAP1	17
SLA2	20
SLAMF6	1
SLAMF7	1
SLAMF8	1
SLC11A1	2
SLC37A2	11
SLC40A1	2
SLC46A2	9
SLC9A5	16
SLCO5A1	8
SLFN12L	17
SLFN14	17
SLURP2	8
SMAP2	1
SMC2	9
SMC4	3
SMPD3	16
SNX31	8
SOCS1	16
SOWAHD	X
SP140	2
SP7	12
SPAG5	17
SPATA1	1
SPC24	19
SPI1	11
SPINK4	9
SPRR1B	1
SPRR3	1
SSBP2	5
SSTR3	22
SSTR5	16
ST8SIA4	5
STAB1	3
STIL	1
STK10	5
STK17A	7
STK17B	2
STK32B	4
STMN1	1
STXBP2	19
SUCNR1	3
SULT2B1	19
SYK	9
TAGAP	6
TARM1	19
TBC1D3	17
TBC1D31	8
TBC1D3K	17
TBX21	17
TBX6	16
TBXAS1	7
TCF12	15
TCF19	6
TCL1B	14
TDGF1	16
TEDC2	16
TFDP2	3
TGM5	15
TGM7	15
THEMIS2	1
TICRR	15
TIFAB	5
TIMP1	X
TK1	17
TLR1	4
TLR6	4
TLR8	X
TMC6	17
TMC8	17
TMEM106A	17
TMEM131L	4
TMEM154	4
TMEM40	3
TMEM71	8
TMPO	12
TMPRSS11A	4
TMPRSS11B	4
TMPRSS11E	4
TMPRSS11F	4
TMPRSS4	11
TMPRSS9	19
TNF	6
TNFAIP8	5
TNFRSF13B	17
TNFRSF13C	22
TNFRSF17	16
TNFRSF25	1
TNFRSF4	1
TNFRSF6B	20
TNFSF11	13
TNFSF4	1
TNFSF8	9
TNIP3	4
TOX2	20
TP53	17
TP53AIP1	11
TPRG1	3
TRAF3IP3	1
TRAPPC3L	6
TRIM29	11
TRIM31	6
TRIM59	3
TRIP13	5
TROAP	12
TSPAN32	11
TTC24	1
TTC7A	2
TTK	6
TUBB	6
TUBB1	20
TXK	4
TYMP	22
TYMS	18
TYROBP	19
UBASH3B	11
UBD	6
UBE2S	19
UBE2T	1
UGT3A2	5
UNC93B1	11
UPK3B	7
UPK3BL1	7
UPK3BL2	7
USP1	1
UTY	Y
VAV1	19
VIP	6
VPREB1	22
VRTN	14
WAS	X
WDFY4	10
WDHD1	14
WDR76	15
WFIKKN1	16
WSCD1	17
XCR1	3
XKR5	8
XRCC2	7
XYLT1	16
ZBP1	20
ZGRF1	4
ZNF101	19
ZNF107	7
ZNF215	11
ZNF296	19
ZNF367	9
ZNF492	19
ZNF681	19
ZNF695	1
ZNF724	19
ZNF730	19
ZNF750	17
ZNF831	20
ZNF860	3
ZNRF1	16
ZP4	1
ZWINT	10
TOTAL	1390

## Sheet: Count-Analysis
Chromosome	PEG (n; HGNC)	Rel. contribution to PEG (%)	LTEEG (n)	Rel. Contribution to LTEEG (%)	LTEEG/PEG (%)	Normalised Contribution Index
1	2002	10.4347	174	12.509	8.69131	1.19879		Key
2	1213	6.32232	75	5.3918	6.18302	0.852821		PEG	Protein-expressed gene
3	1040	5.42062	57	4.09777	5.48077	0.75596		Rel. contribution to PEG	Number of PEG on a particular chromosome divided by the genome-wide number of PEG x 100
4	738	3.84655	68	4.88857	9.21409	1.2709		LTEEG	Lymphoid tissue elevated expression gene
5	800	4.16971	50	3.59454	6.25	0.86206		Rel. contribution to LTEEG	Number of LTEEG on a particular chromosome divided by the genome-wide number of LTEEG x 100
6	1009	5.25904	129	9.2739	12.7849	1.76342		Normalised contribution index	Rel. contribition to LTEEG/Rel. Contribution to PEG; i.e. %LTEEG/%PEG on a certain chromosome
7	879	4.58147	41	2.94752	4.66439	0.643357
8	658	3.42958	41	2.94752	6.231	0.859439
9	753	3.92474	35	2.51618	4.64807	0.641107
10	713	3.71625	36	2.58807	5.04909	0.696418
11	1271	6.62462	95	6.82962	7.47443	1.03094
12	1003	5.22777	83	5.96693	8.27517	1.14139
13	313	1.6314	20	1.43781	6.38978	0.881339
14	596	3.10643	21	1.50971	3.52349	0.485993
15	566	2.95007	48	3.45075	8.48057	1.16972
16	813	4.23746	63	4.52912	7.74908	1.06883
17	1135	5.91577	90	6.47017	7.92952	1.09371
18	263	1.37079	14	1.00647	5.32319	0.734226
19	1383	7.20838	129	9.2739	9.32755	1.28654
20	522	2.72073	41	2.94752	7.85441	1.08335
21	223	1.16231	12	0.862689	5.38117	0.742222
22	424	2.20994	31	2.22861	7.31132	1.00845
X	841	4.3834	36	2.58807	4.28062	0.590424
Y	46	0.239758	3	0.215672	6.52174	0.899541
PAR	18	0.0938184	1	0.0718907	5.55556	0.766275
TOTAL or (median)	19186	(4.1)	1391	(3.2)	(6.5)	(0.95)
No data			28
GRAN TOTAL			1419
S-Wp = p-value according to Shapiro-Wilk test for normality							http://www.statskingdom.com/320ShapiroWilk_2.html?utm_expid=.ySMaHkUJQY6lbyPUlQ_6Jg.1&utm_referrer=https%3A%2F%2Fwww.google.com%2F
date:		2019, nov. 4-6
S-Wp chr. 1-XY	0.57	0.6	0.02	0.02	0.26	0.2
distribution	normal	normal	not normal	non normal	normal	normal
mean	800	4.2	58	4.2	6.9	0.94
median	777	4.1	45	3.2	6.5	0.88
SD	428	2	42	3	1.7	0.28
outlier			chr. 1	chr.1		chr. 6
S-Wp chr. 1-XY w/ outlier		w/o outlier	0.1	0.09
distribution			normal	normal
mean			53	3.9
median			46	3.2
SD			34	2.5

## Sheet: Excluded
ID
ACO64853.2
Z82206.1
AL031777.3
AC243967.1
AC010616.1
AC012476.1
AC119396.1
AC233755.1
AC008878.3
AC009086.2
AC011530.1
AC013394.1
AC020909.1
AC068775.1
AC069368.1
AC099489.1
AC136428.1
AC233755.2
AC243756.1
AL049634.2
AL121845.3
AL160272.2
AL512428.1
AL645941.2
AL669918.1
Z83844.3
-
-
28
